# Supplementary material for: Retracted: The Effect of Elephantopus scaber L. on Liver Regeneration after Partial Hepatectomy
Source: Hindawi journal article supplement (doi:10.1155/2017/4561243), 2017-01-01

**FIG 2**

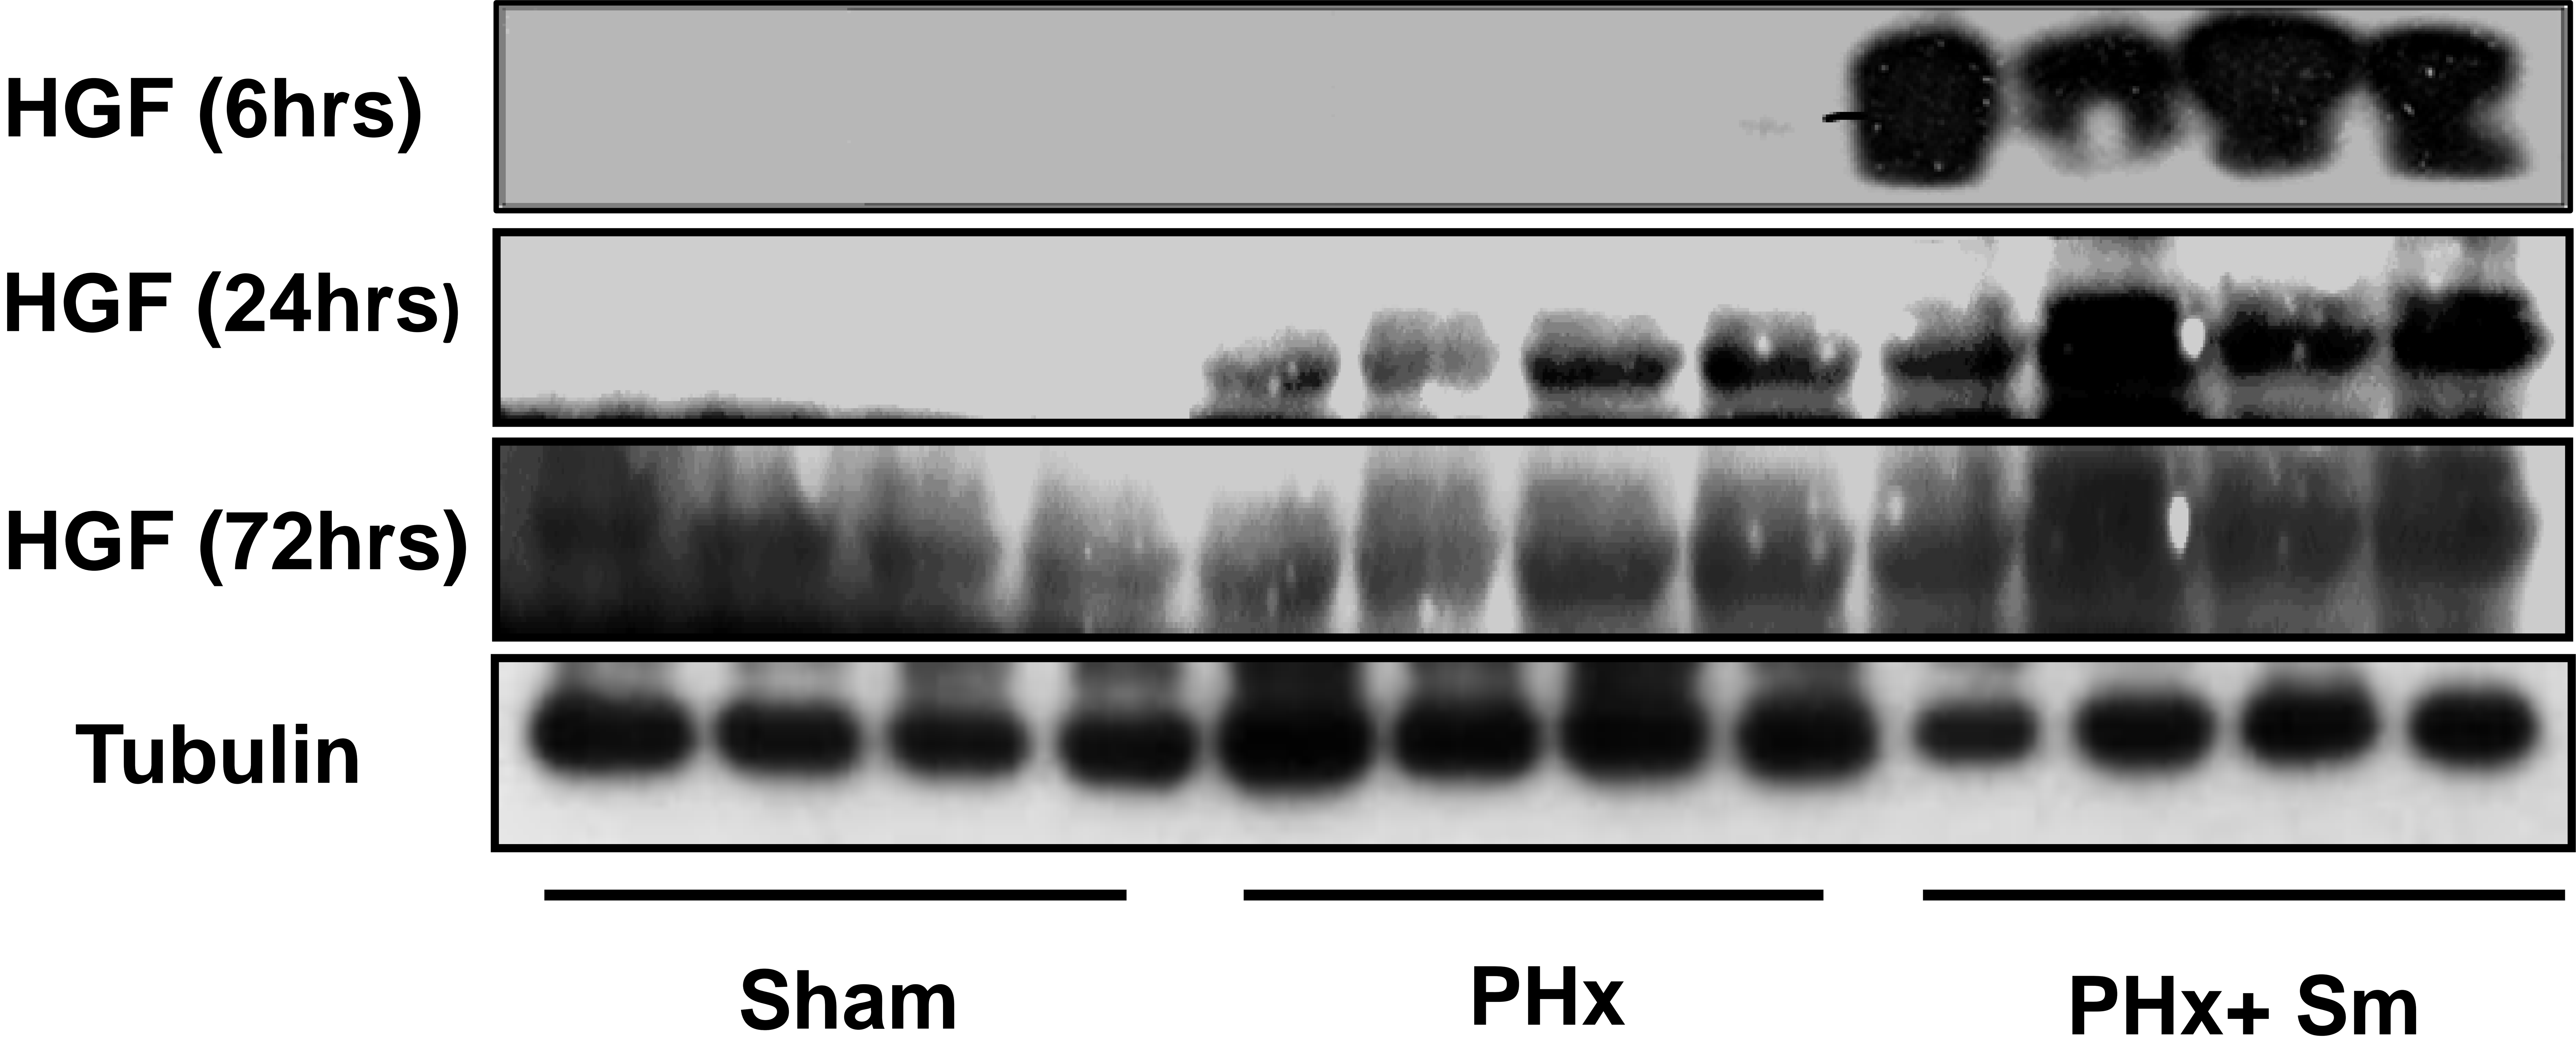

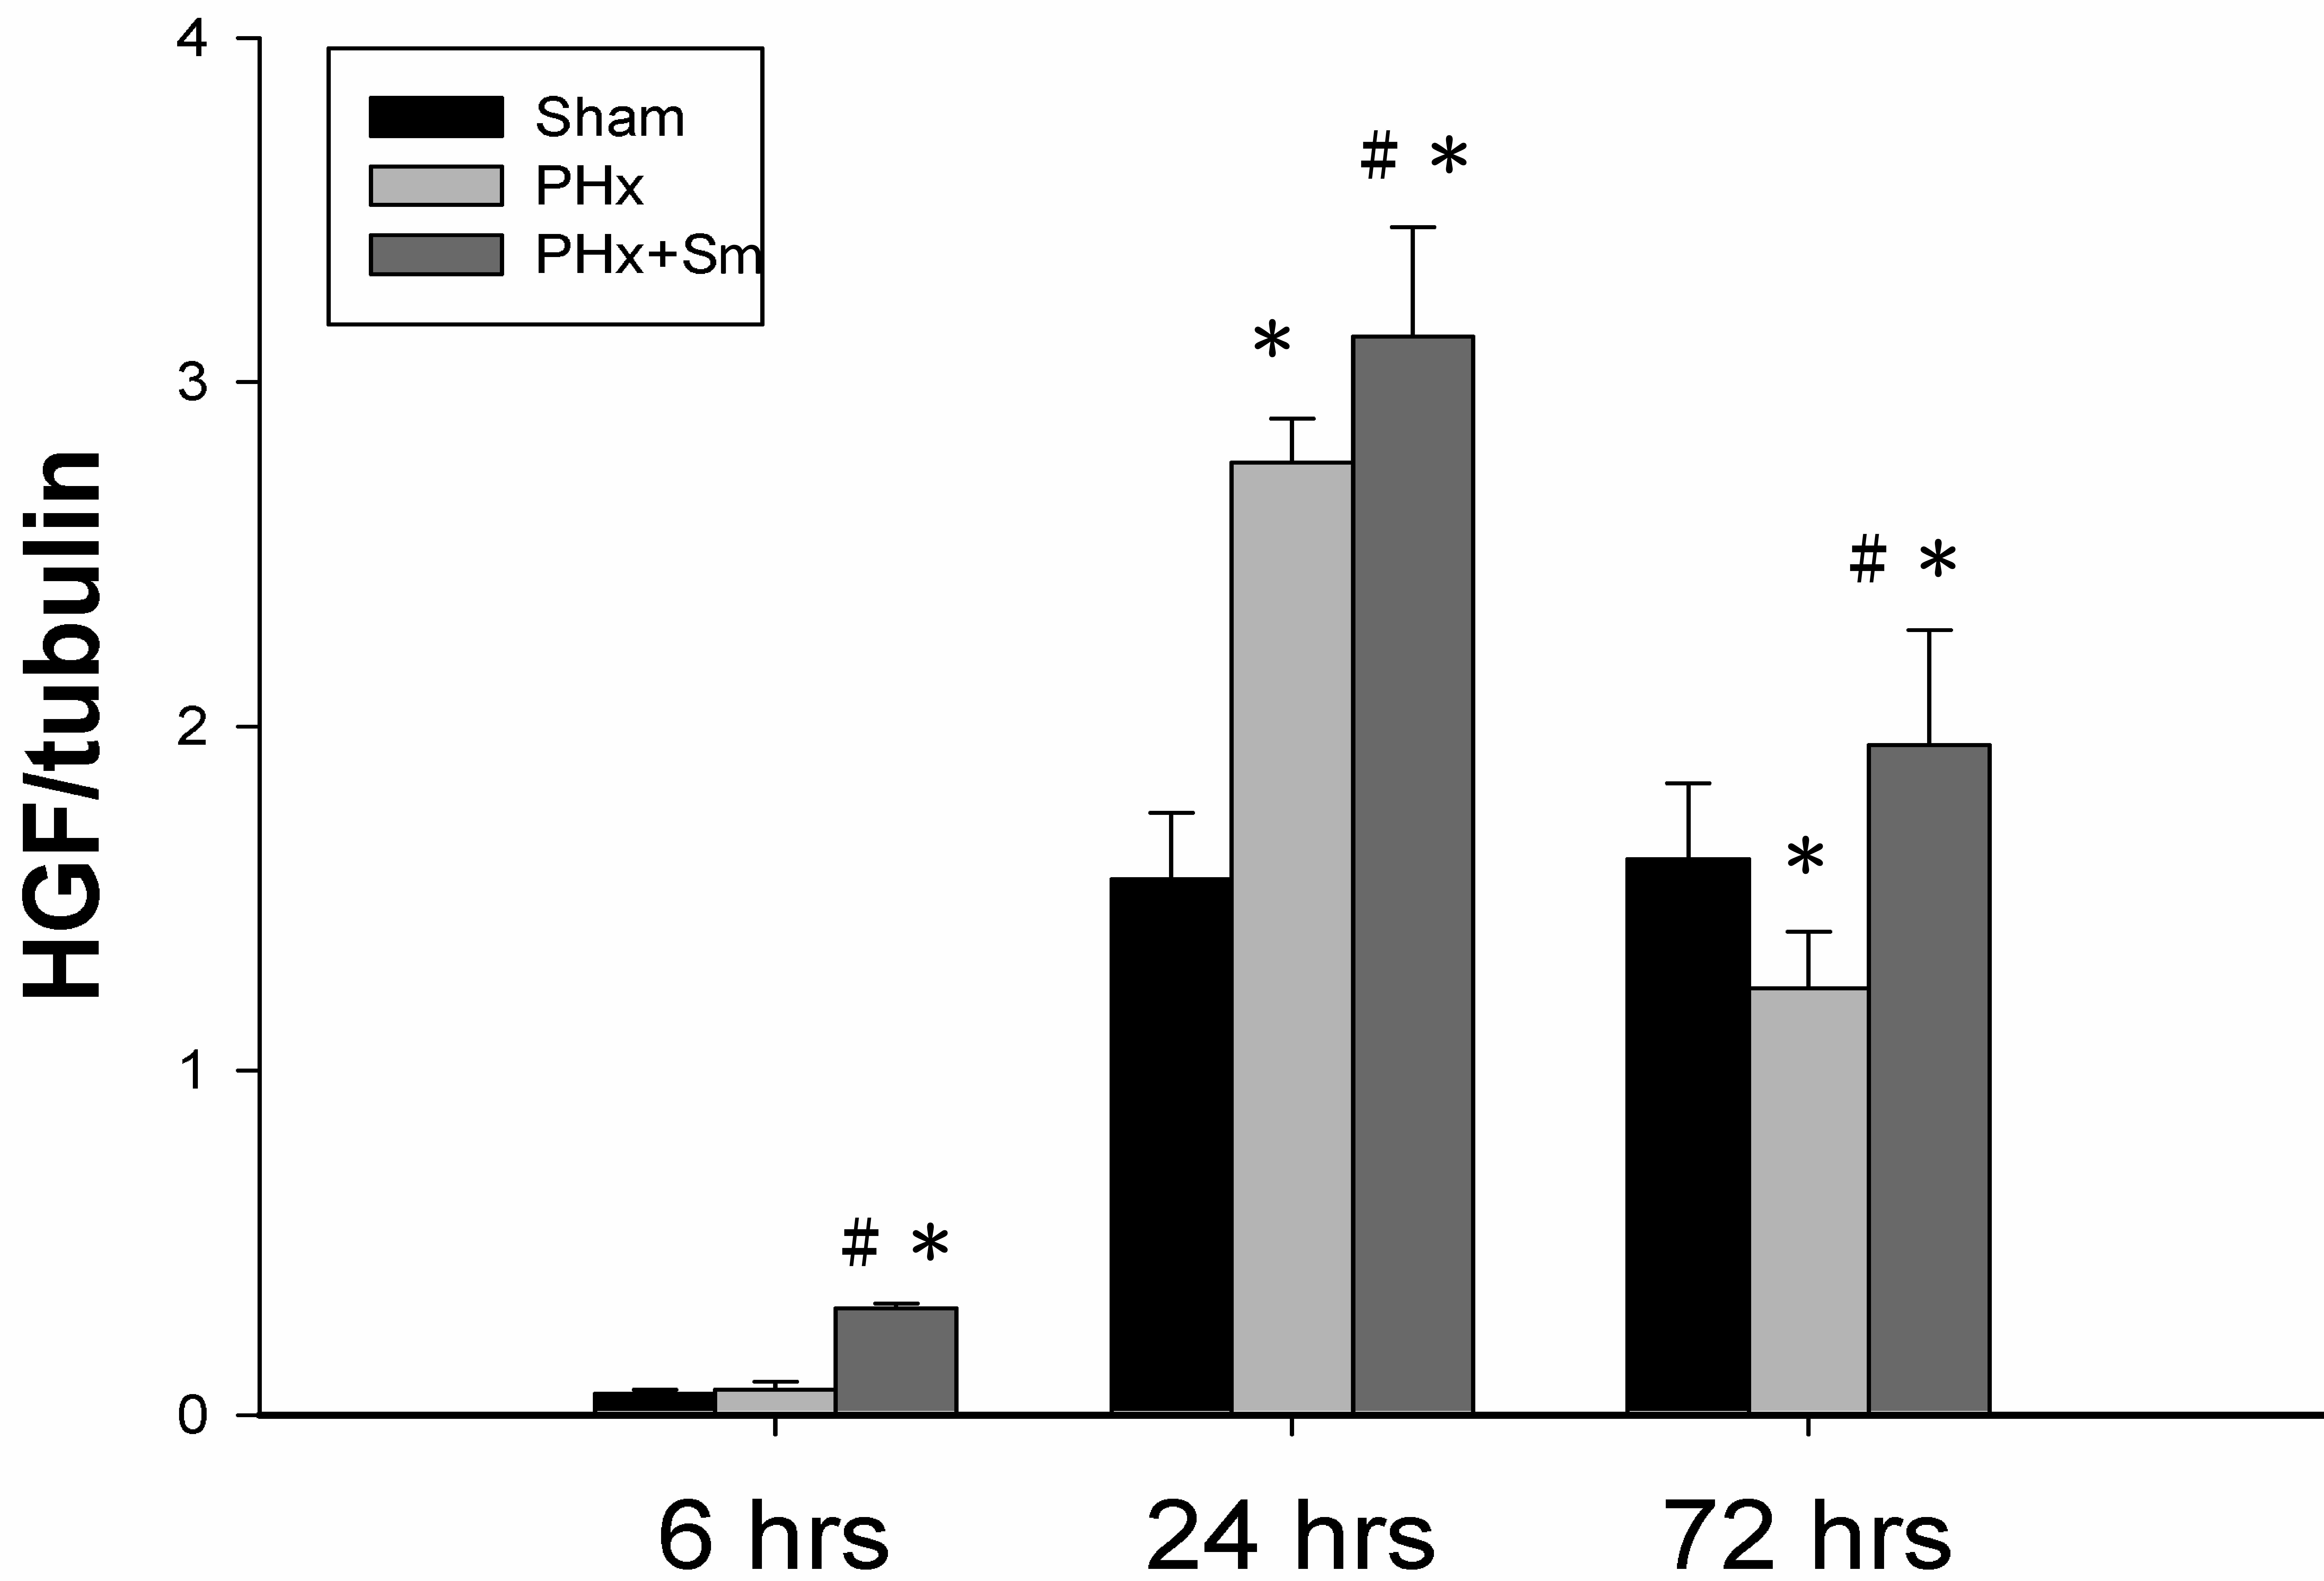

**Cyclin D1 (6 hrs)**

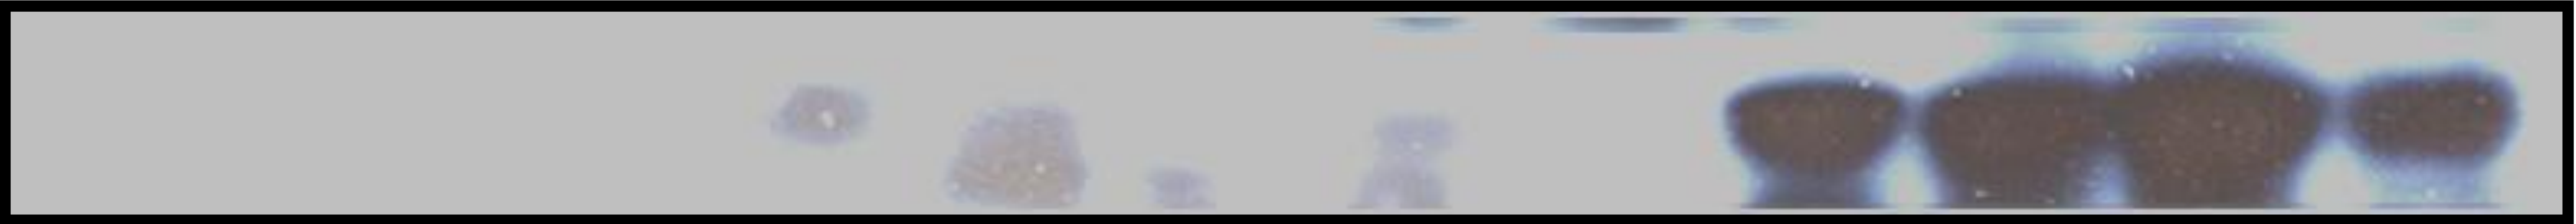

**Cyclin D1 (24 hrs)**

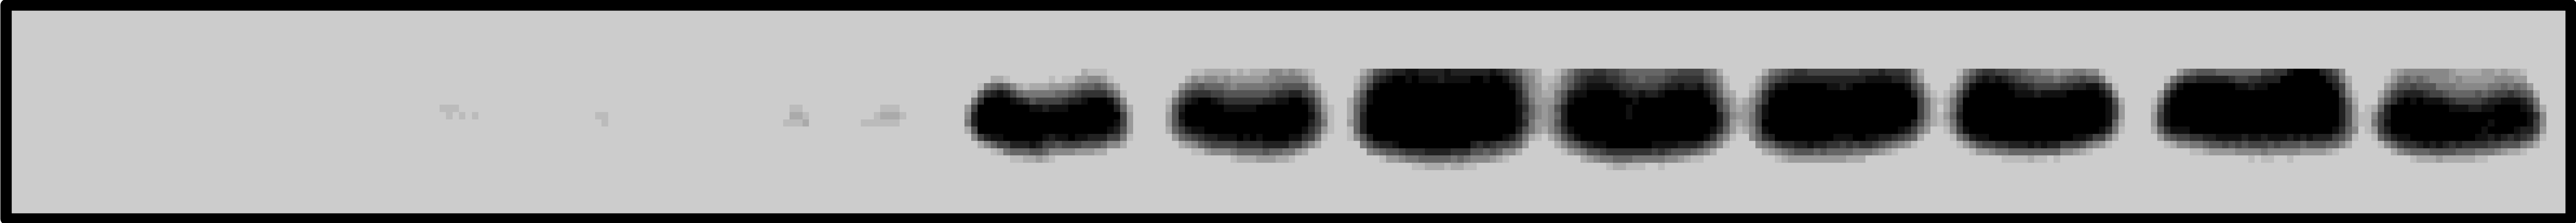

**Cyclin D1 (72 hrs)**

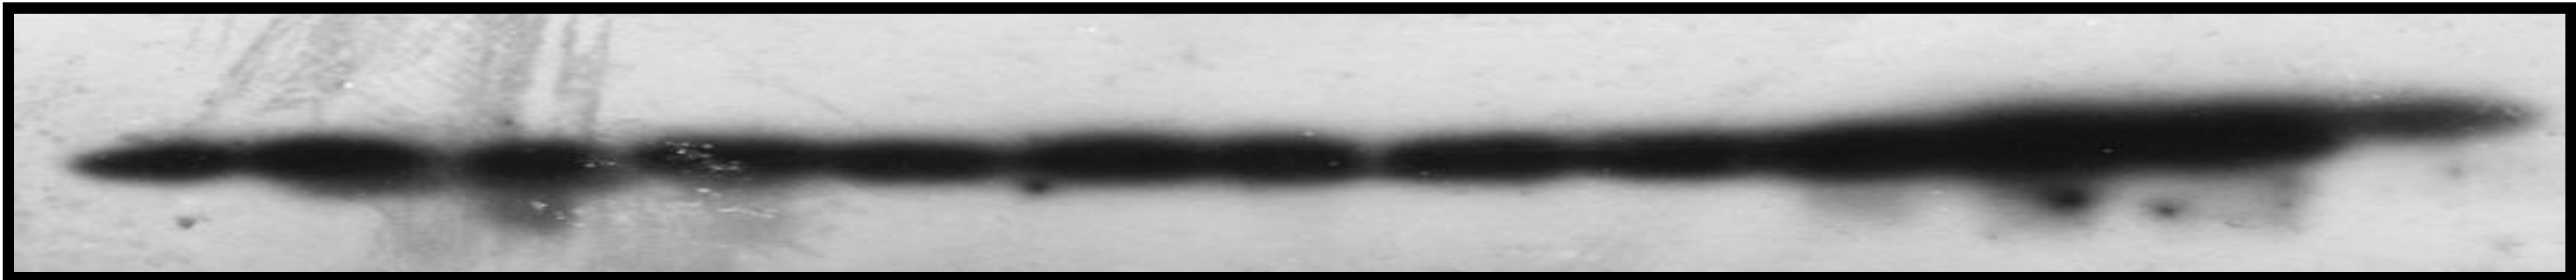

**Tubulin**

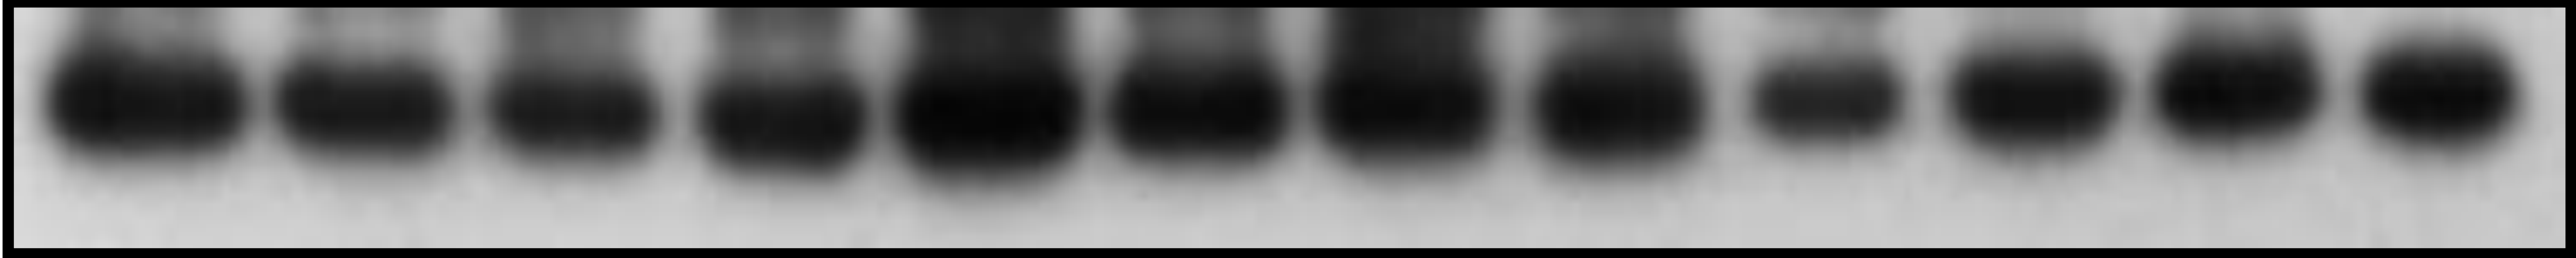

**Sham**

**PHx**

**PHx+ Sm**

# cyclin D1/tubulin

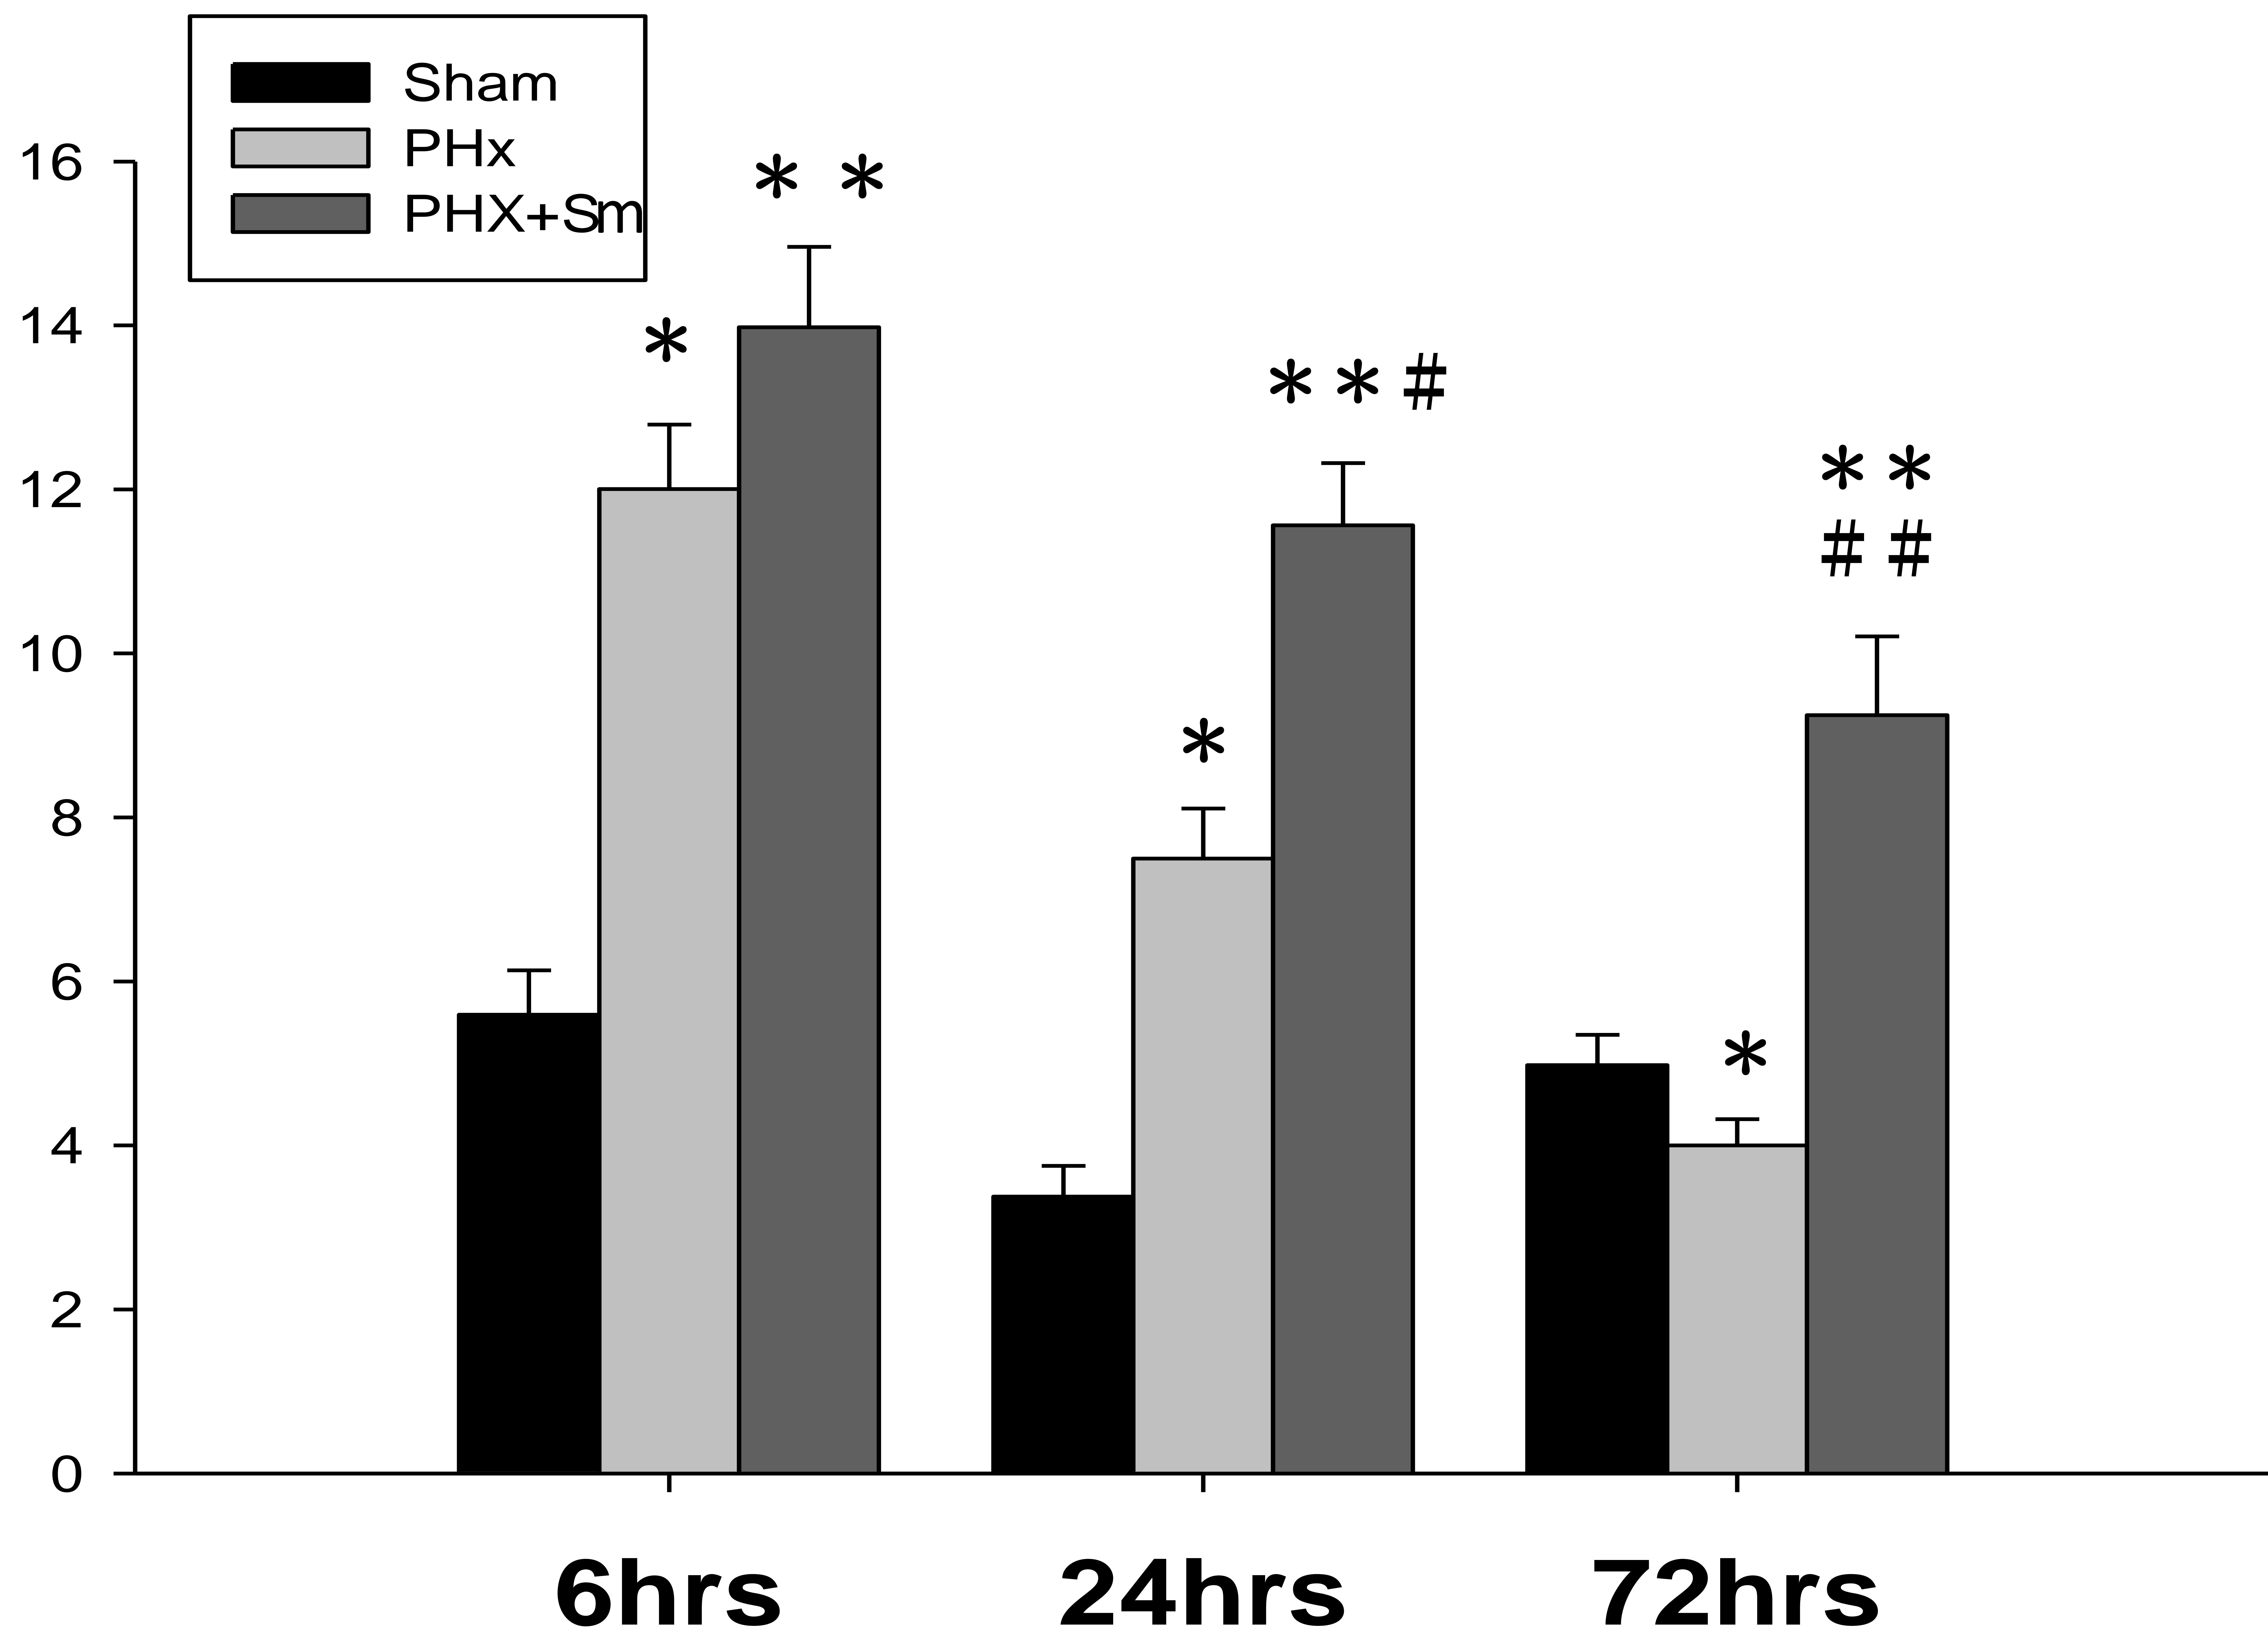



**Cyclin E (6 hrs)**

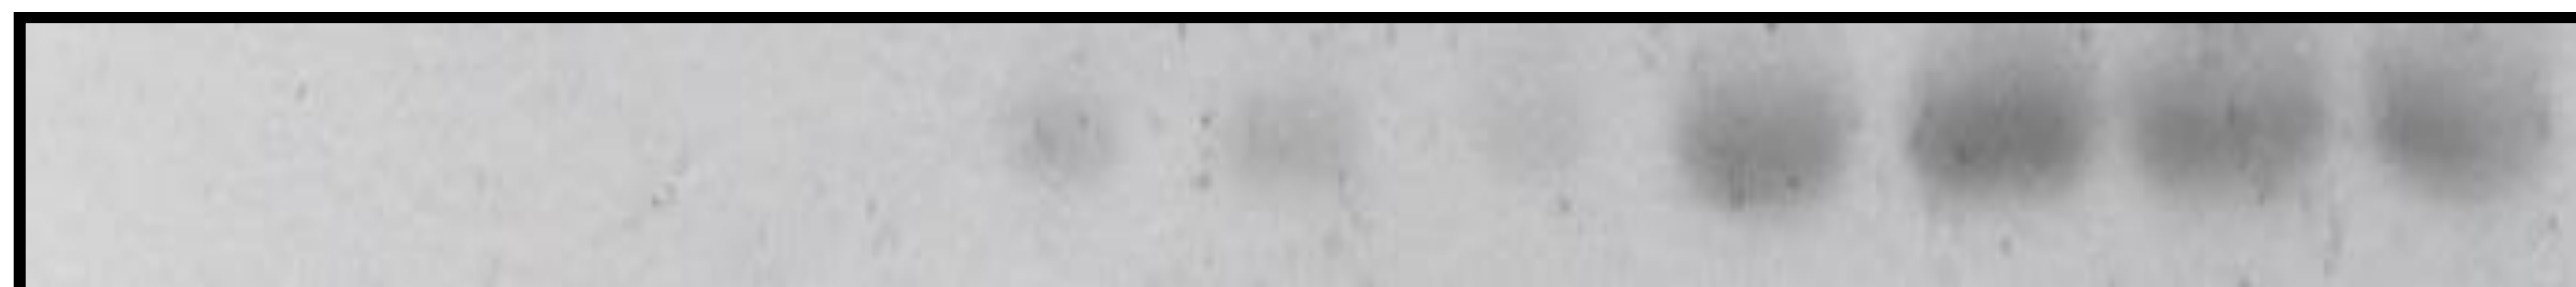

**Cyclin E (24 hrs)**

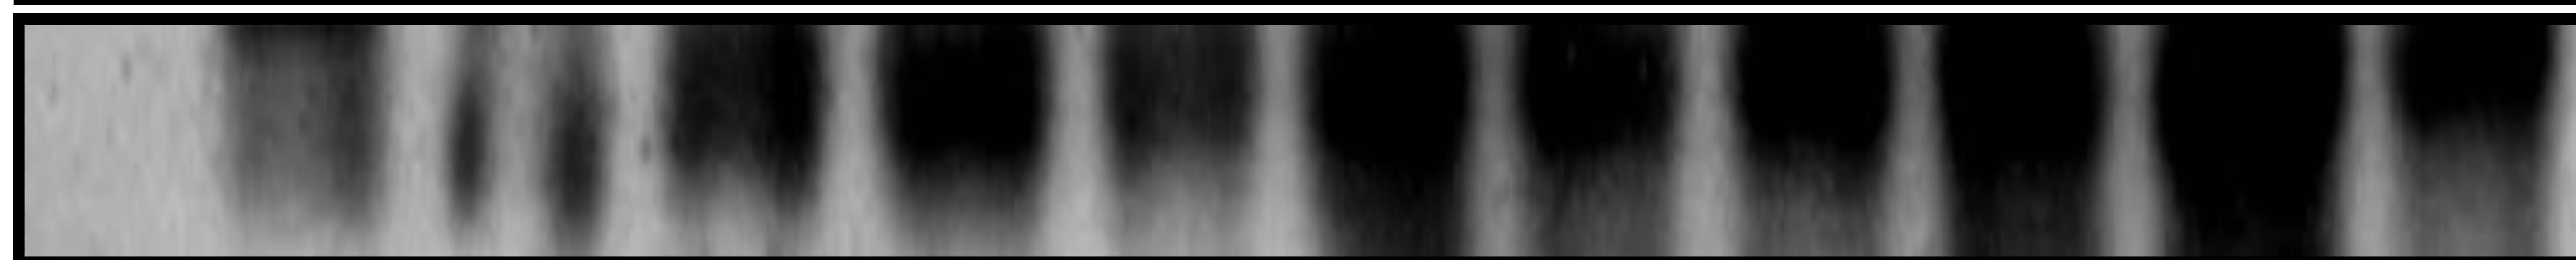

**Cyclin E (72 hrs)**

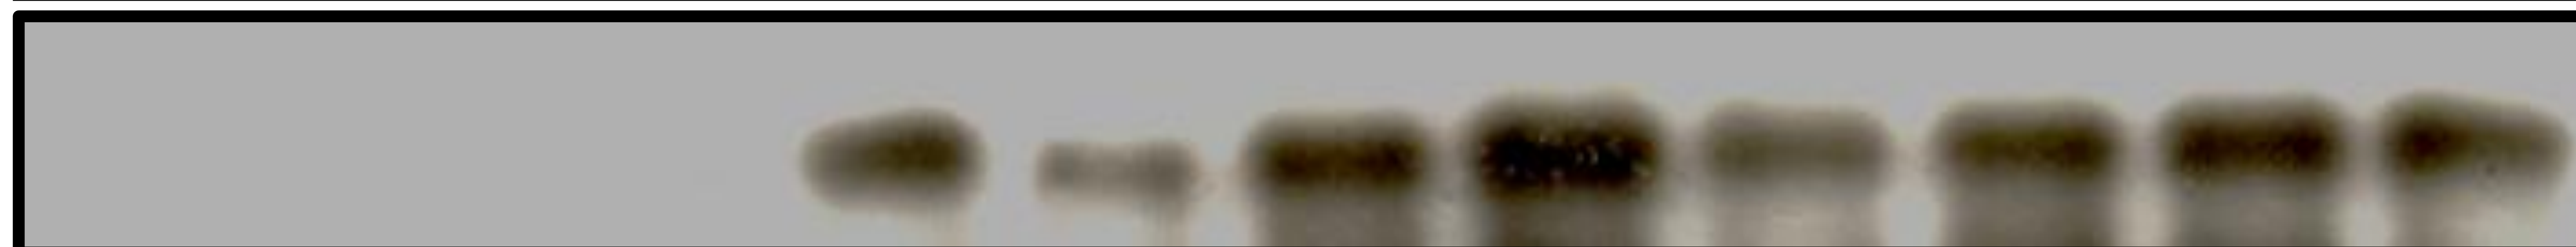

**E2F (6 hrs)**

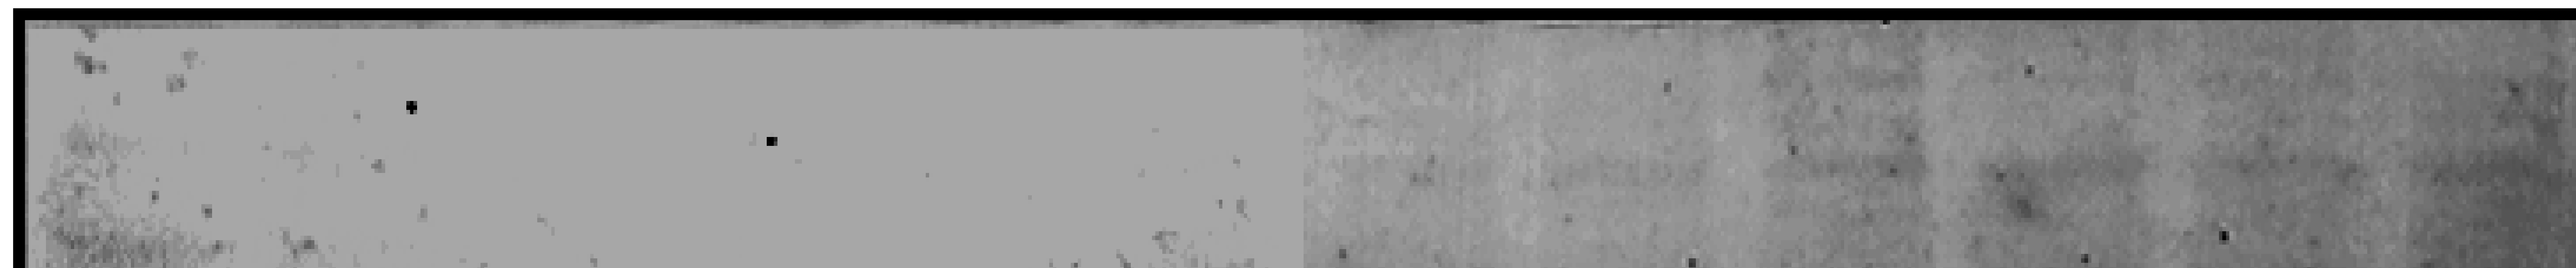

**E2F (24 hrs)**

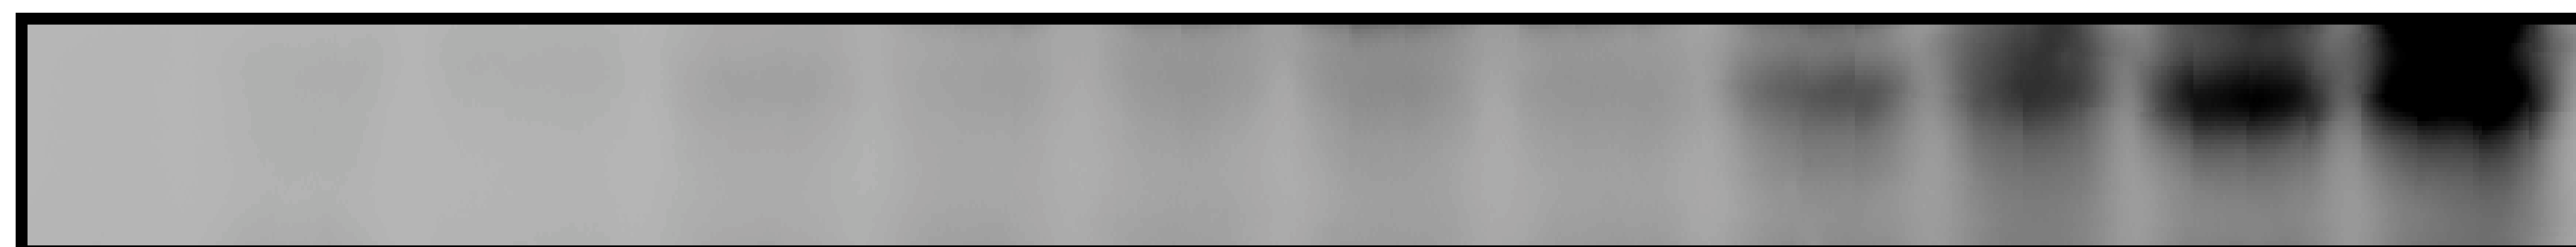

**E2F (72 hrs)**

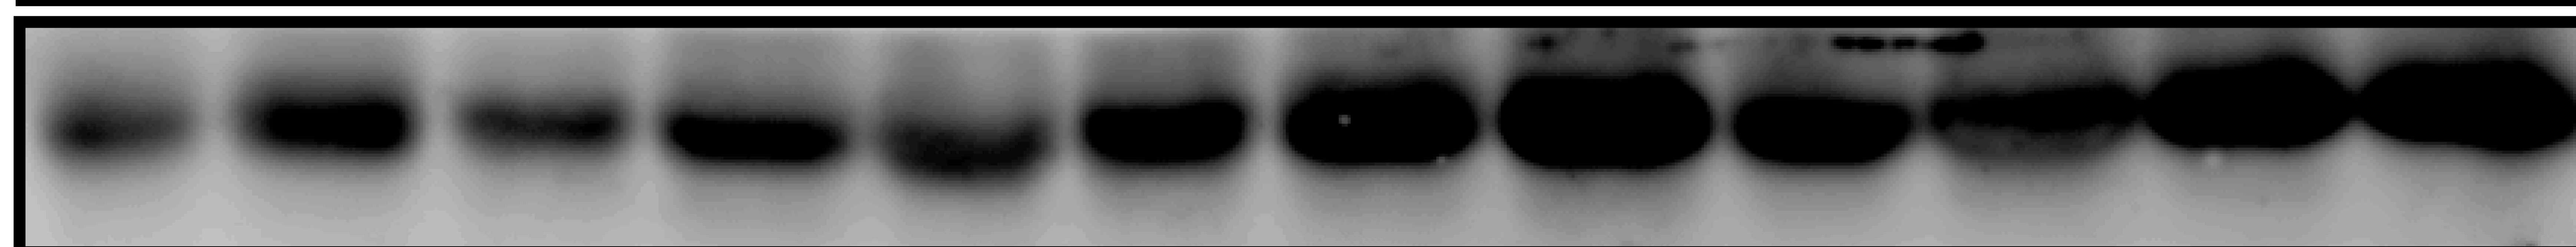

**Tubulin**

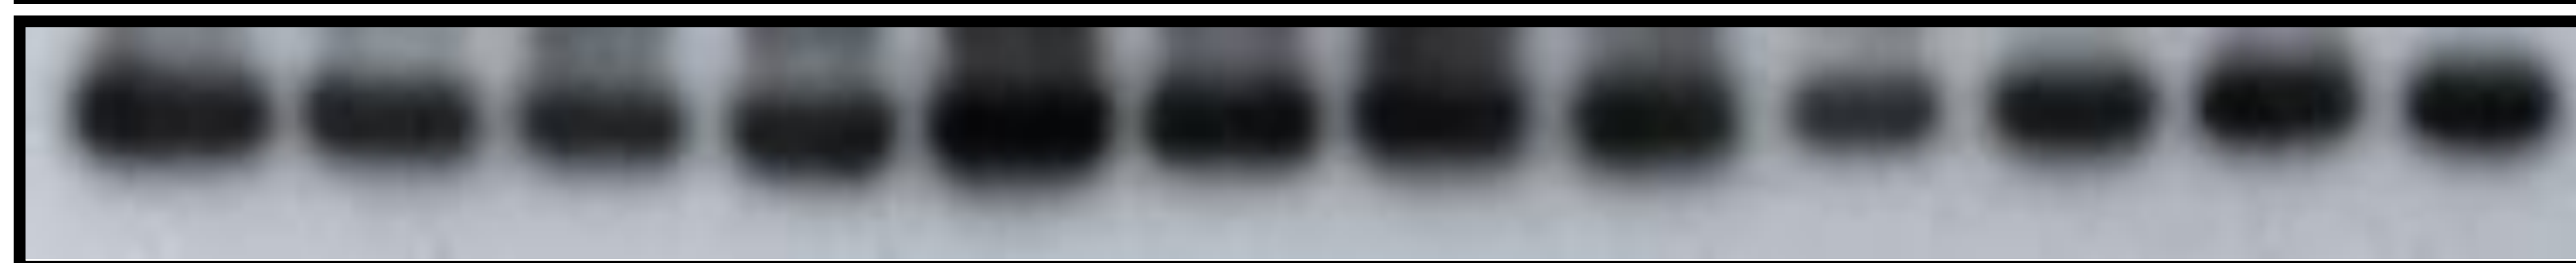

**Sham**

**PHx**

**PHx+Sm**

# cyclin E/tubulin

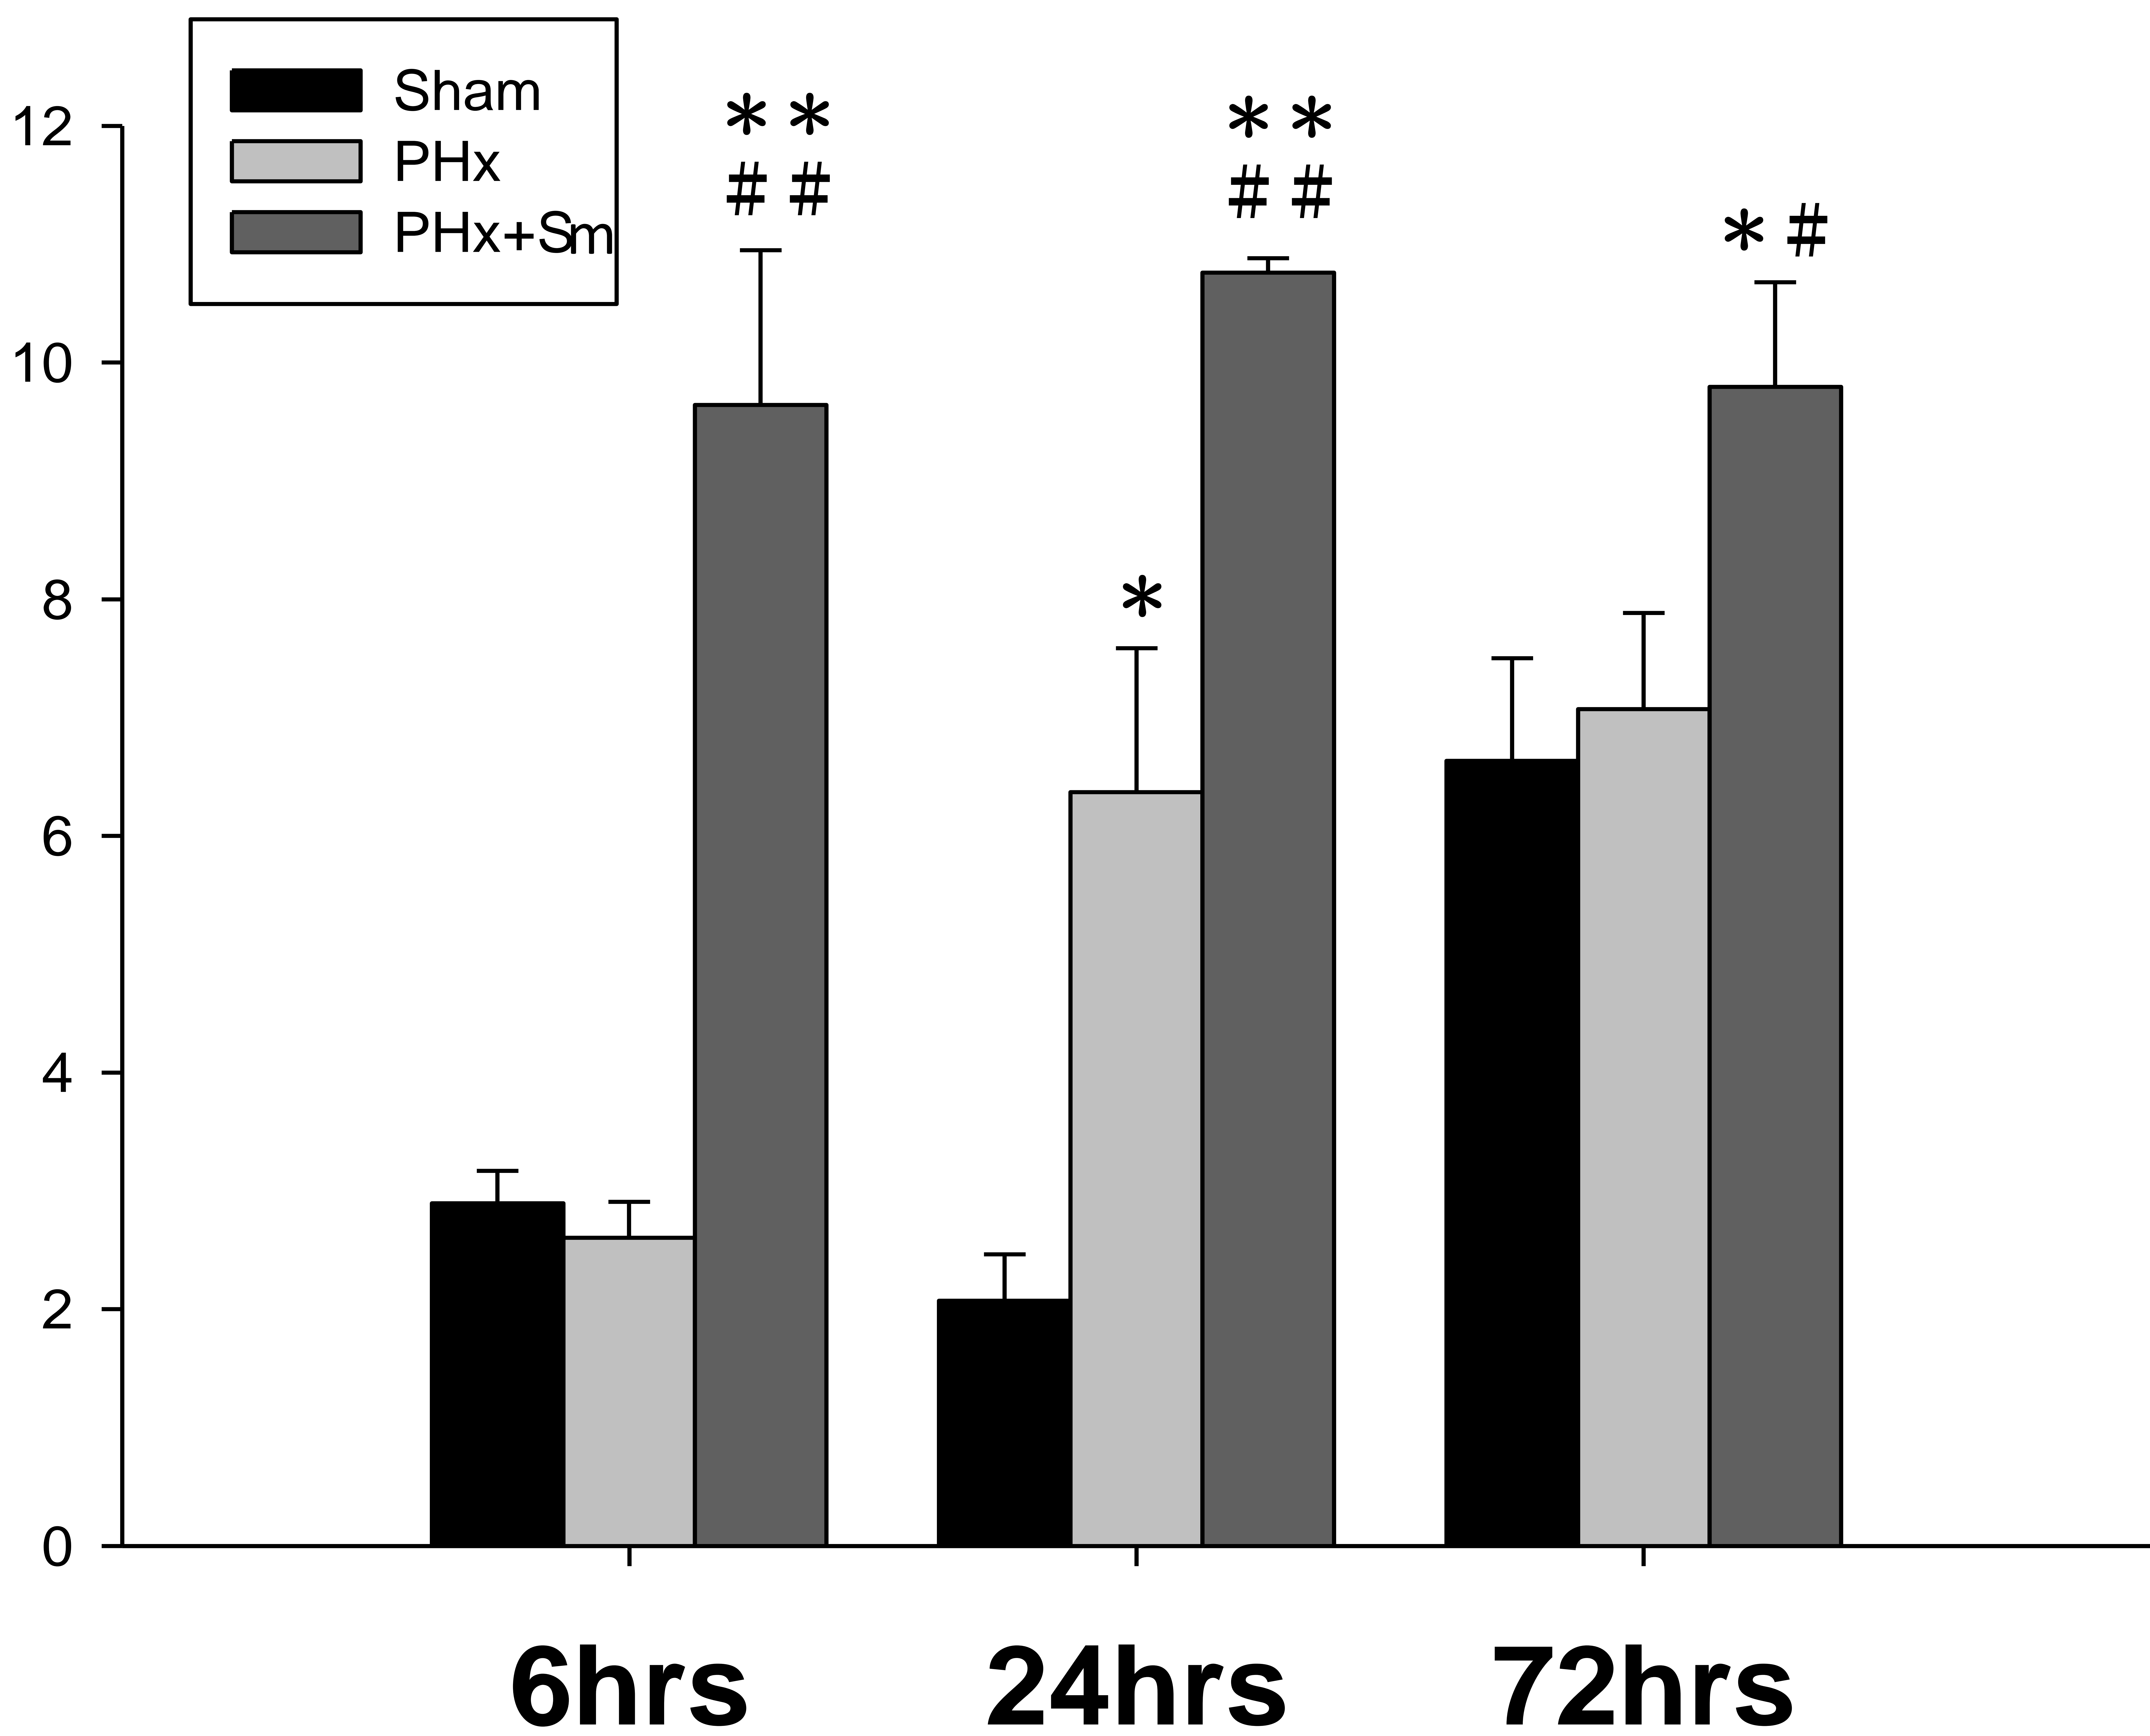

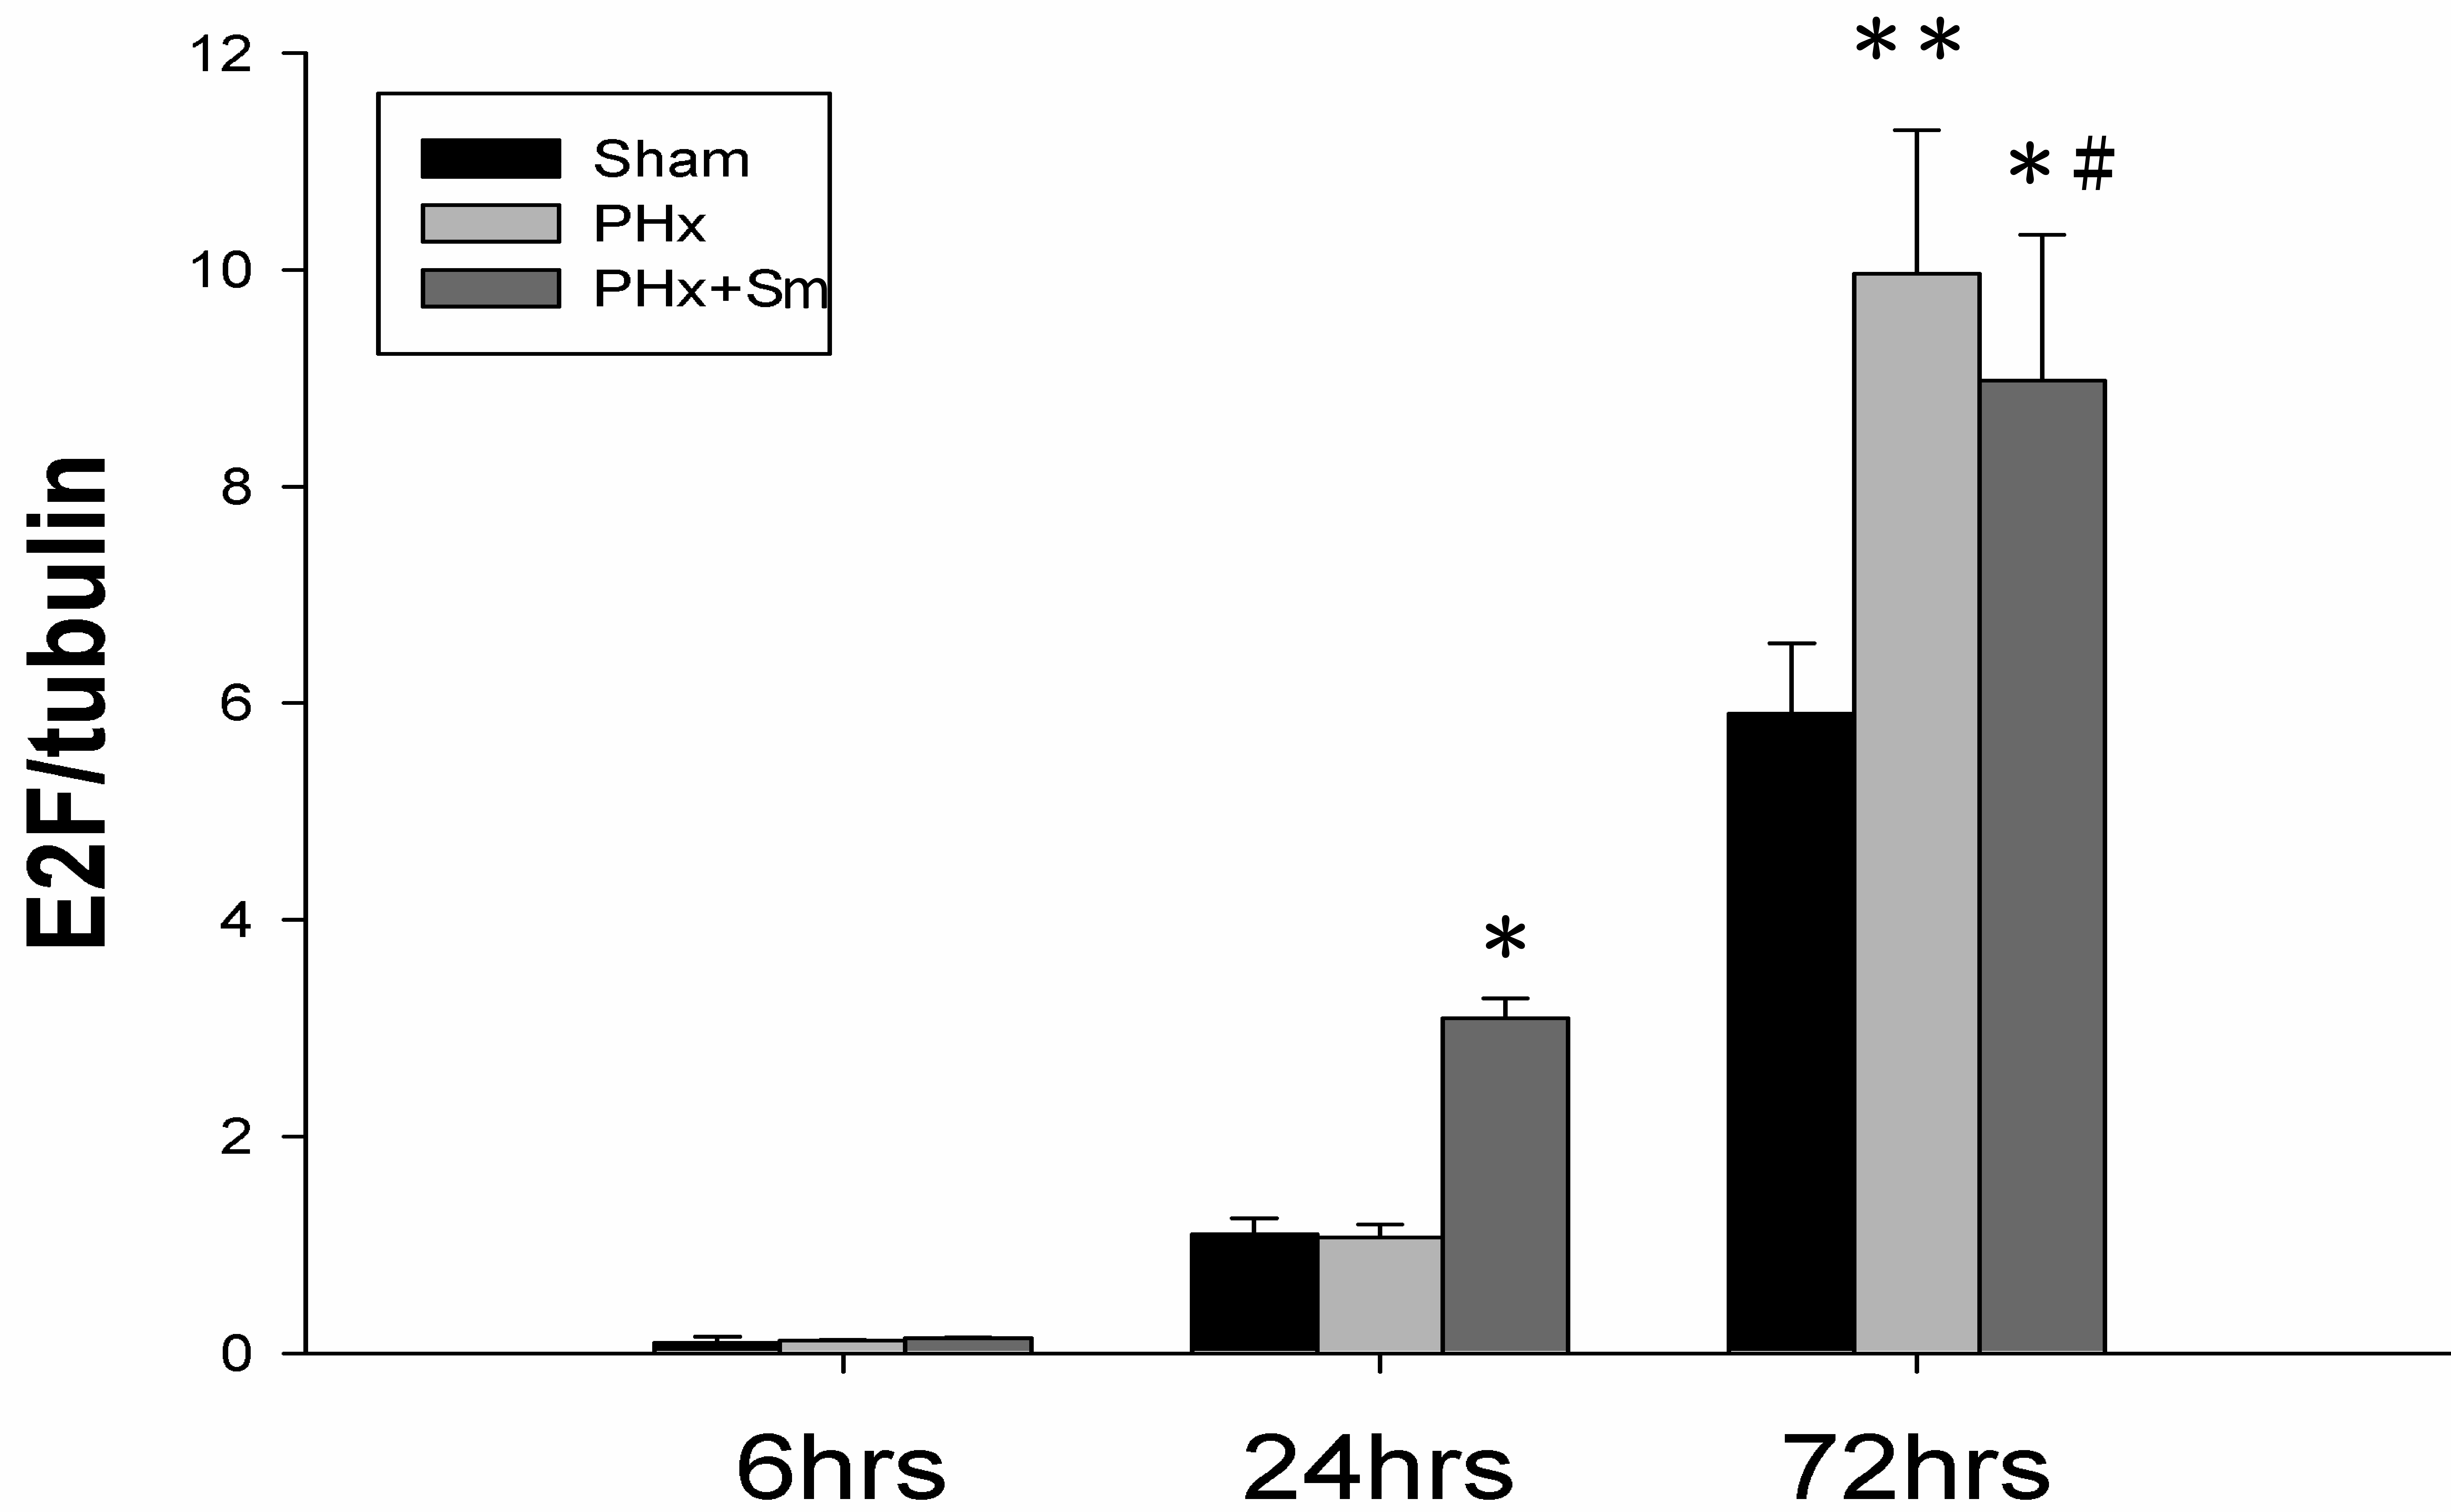



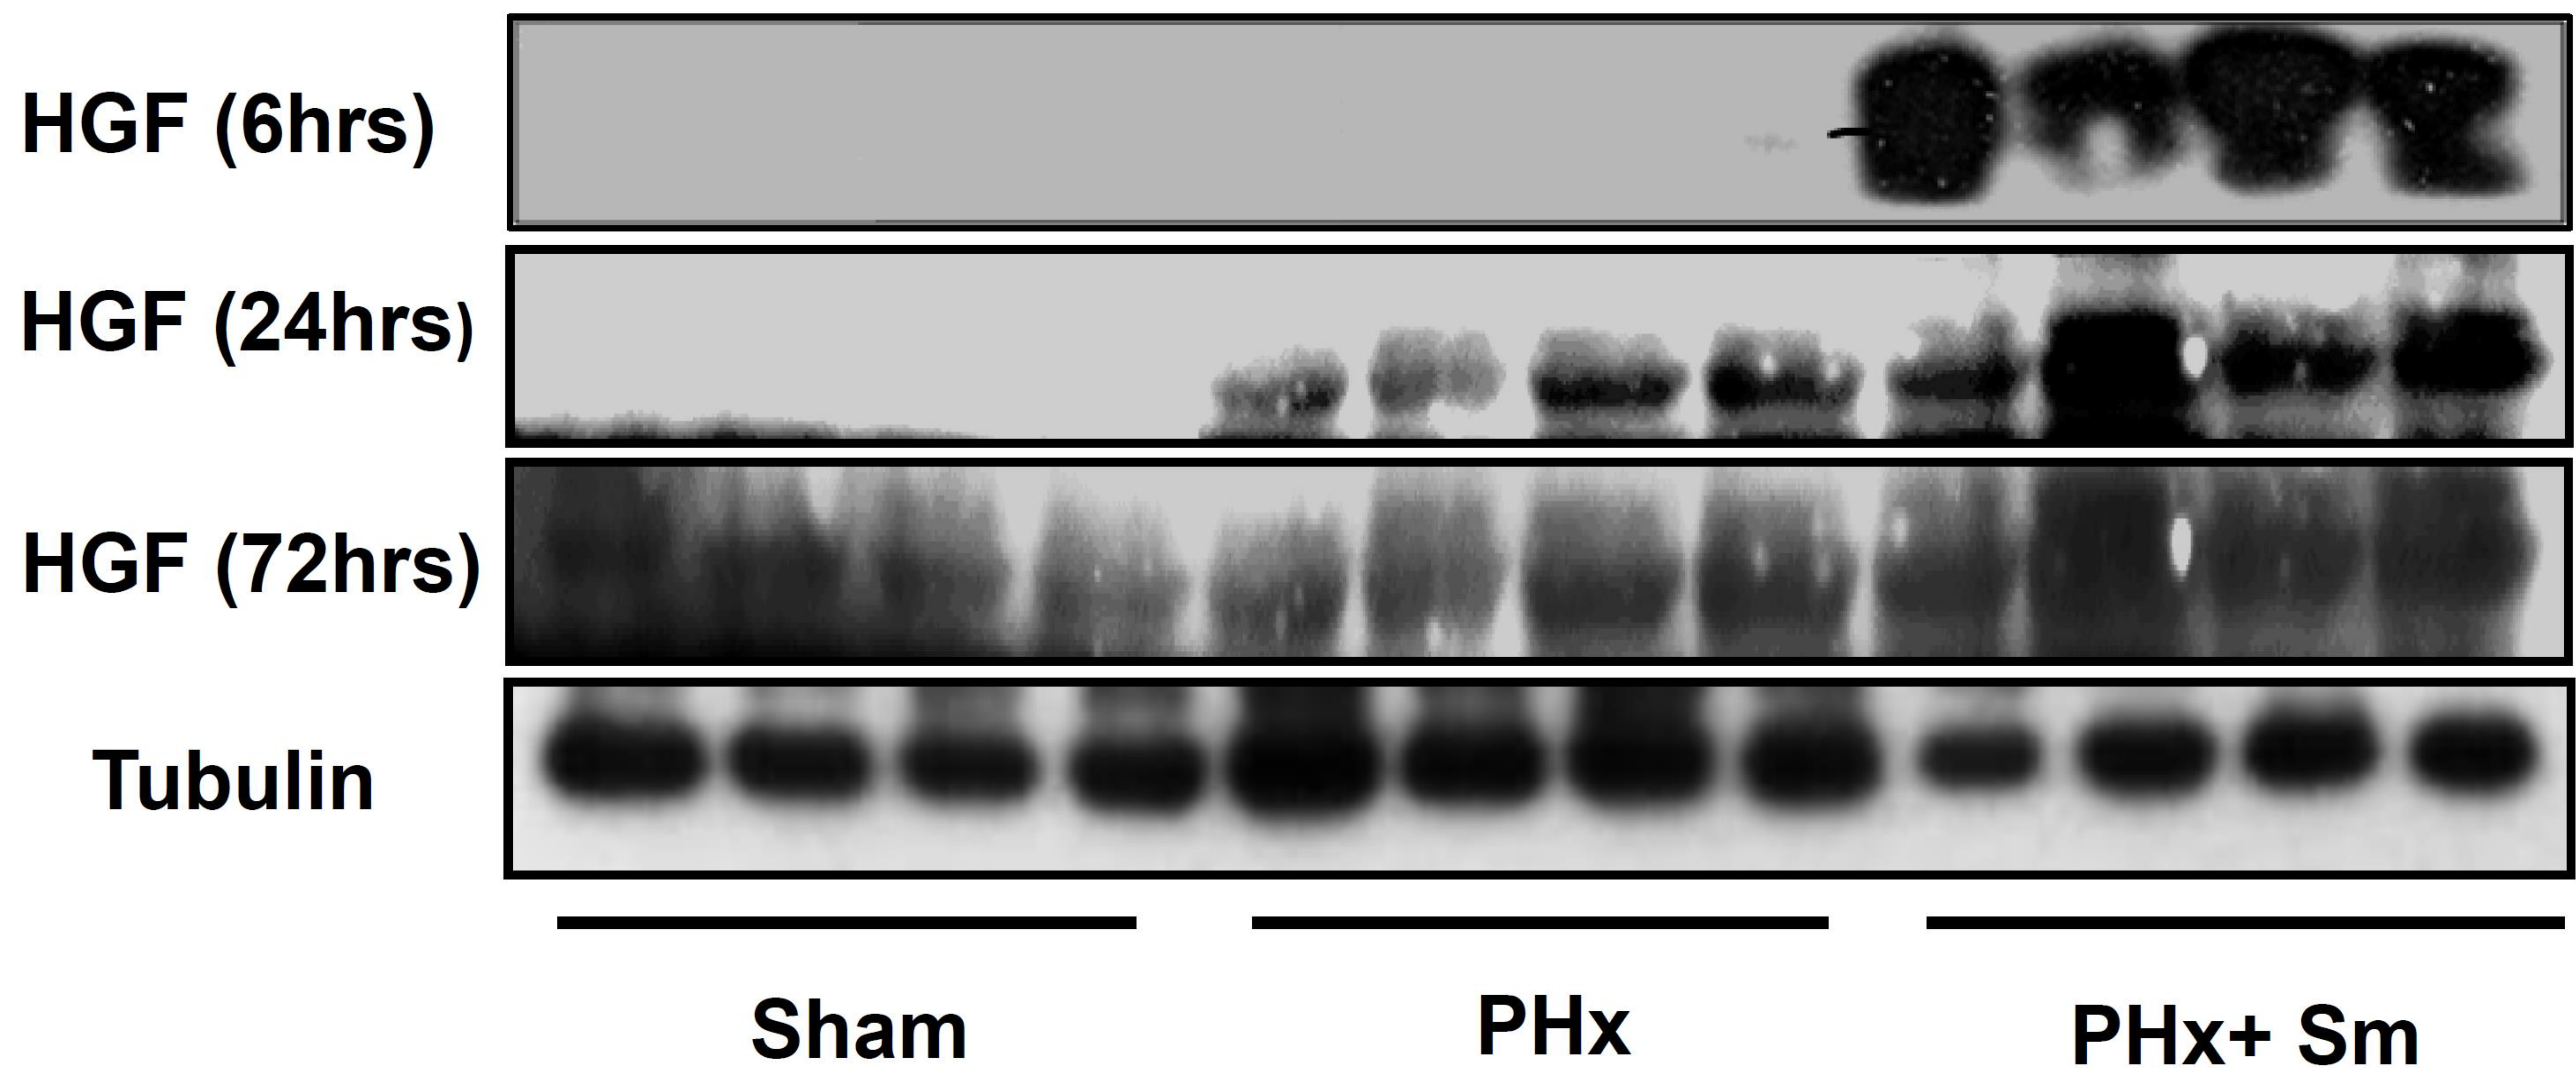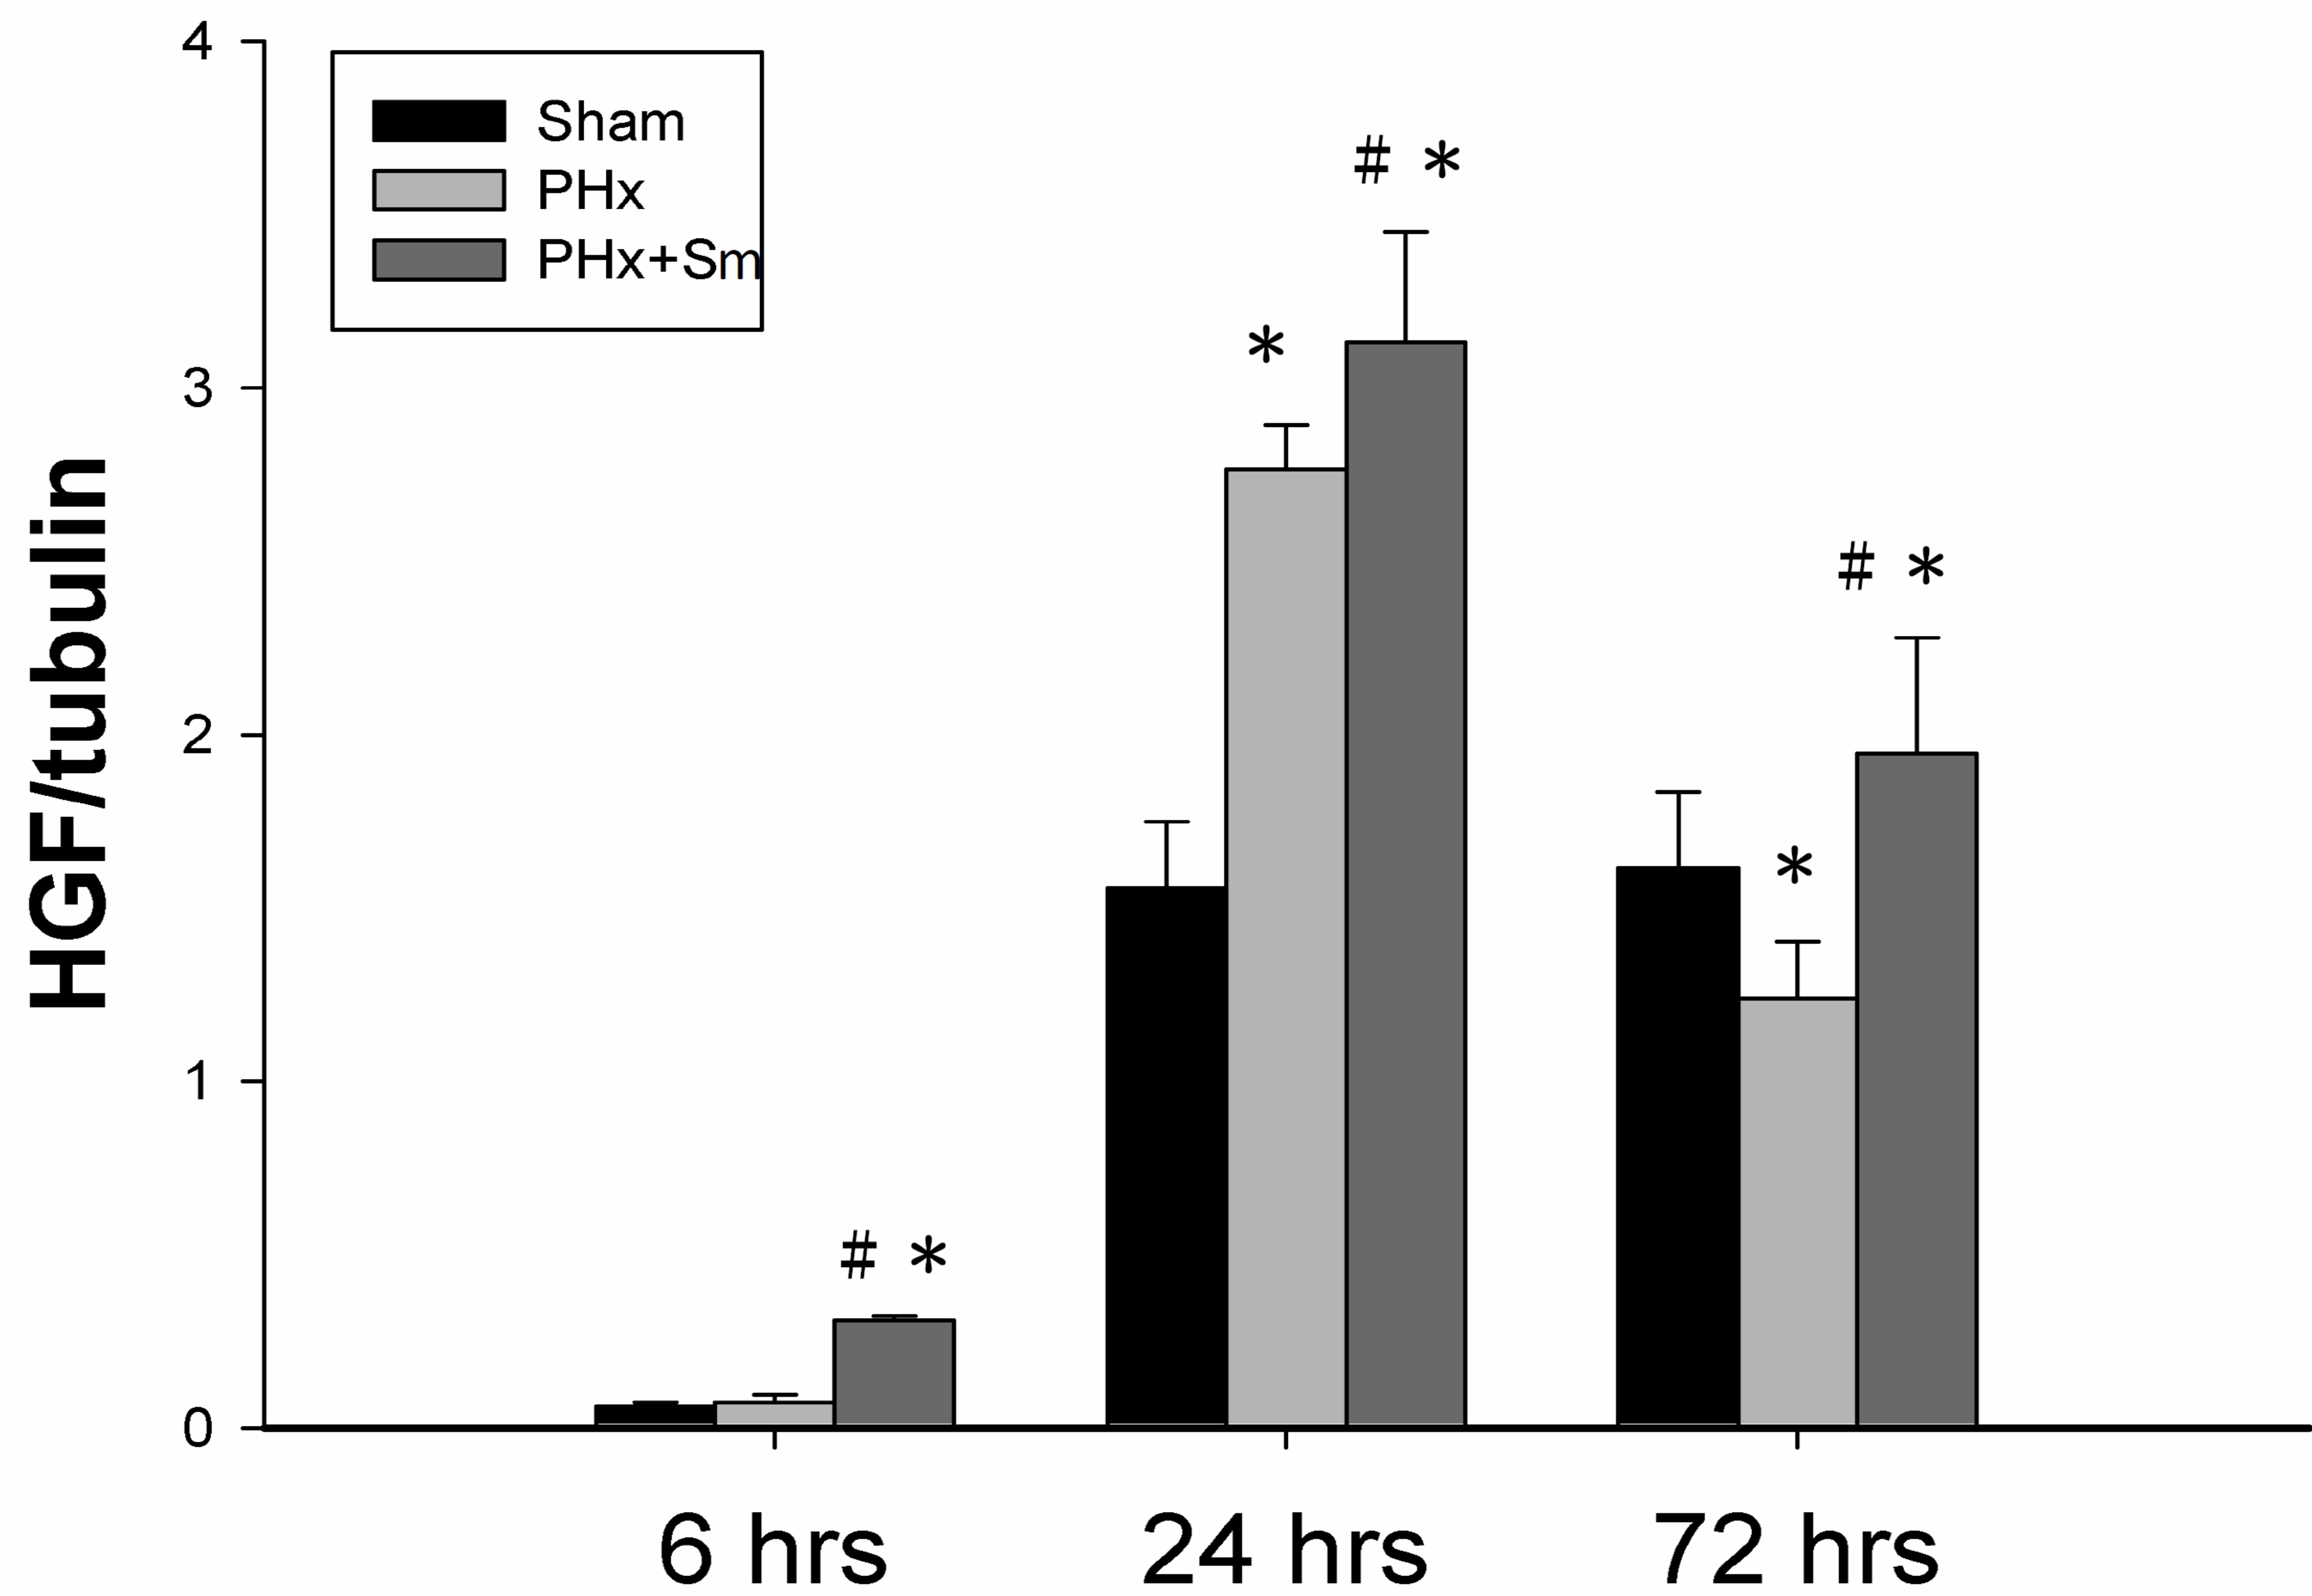



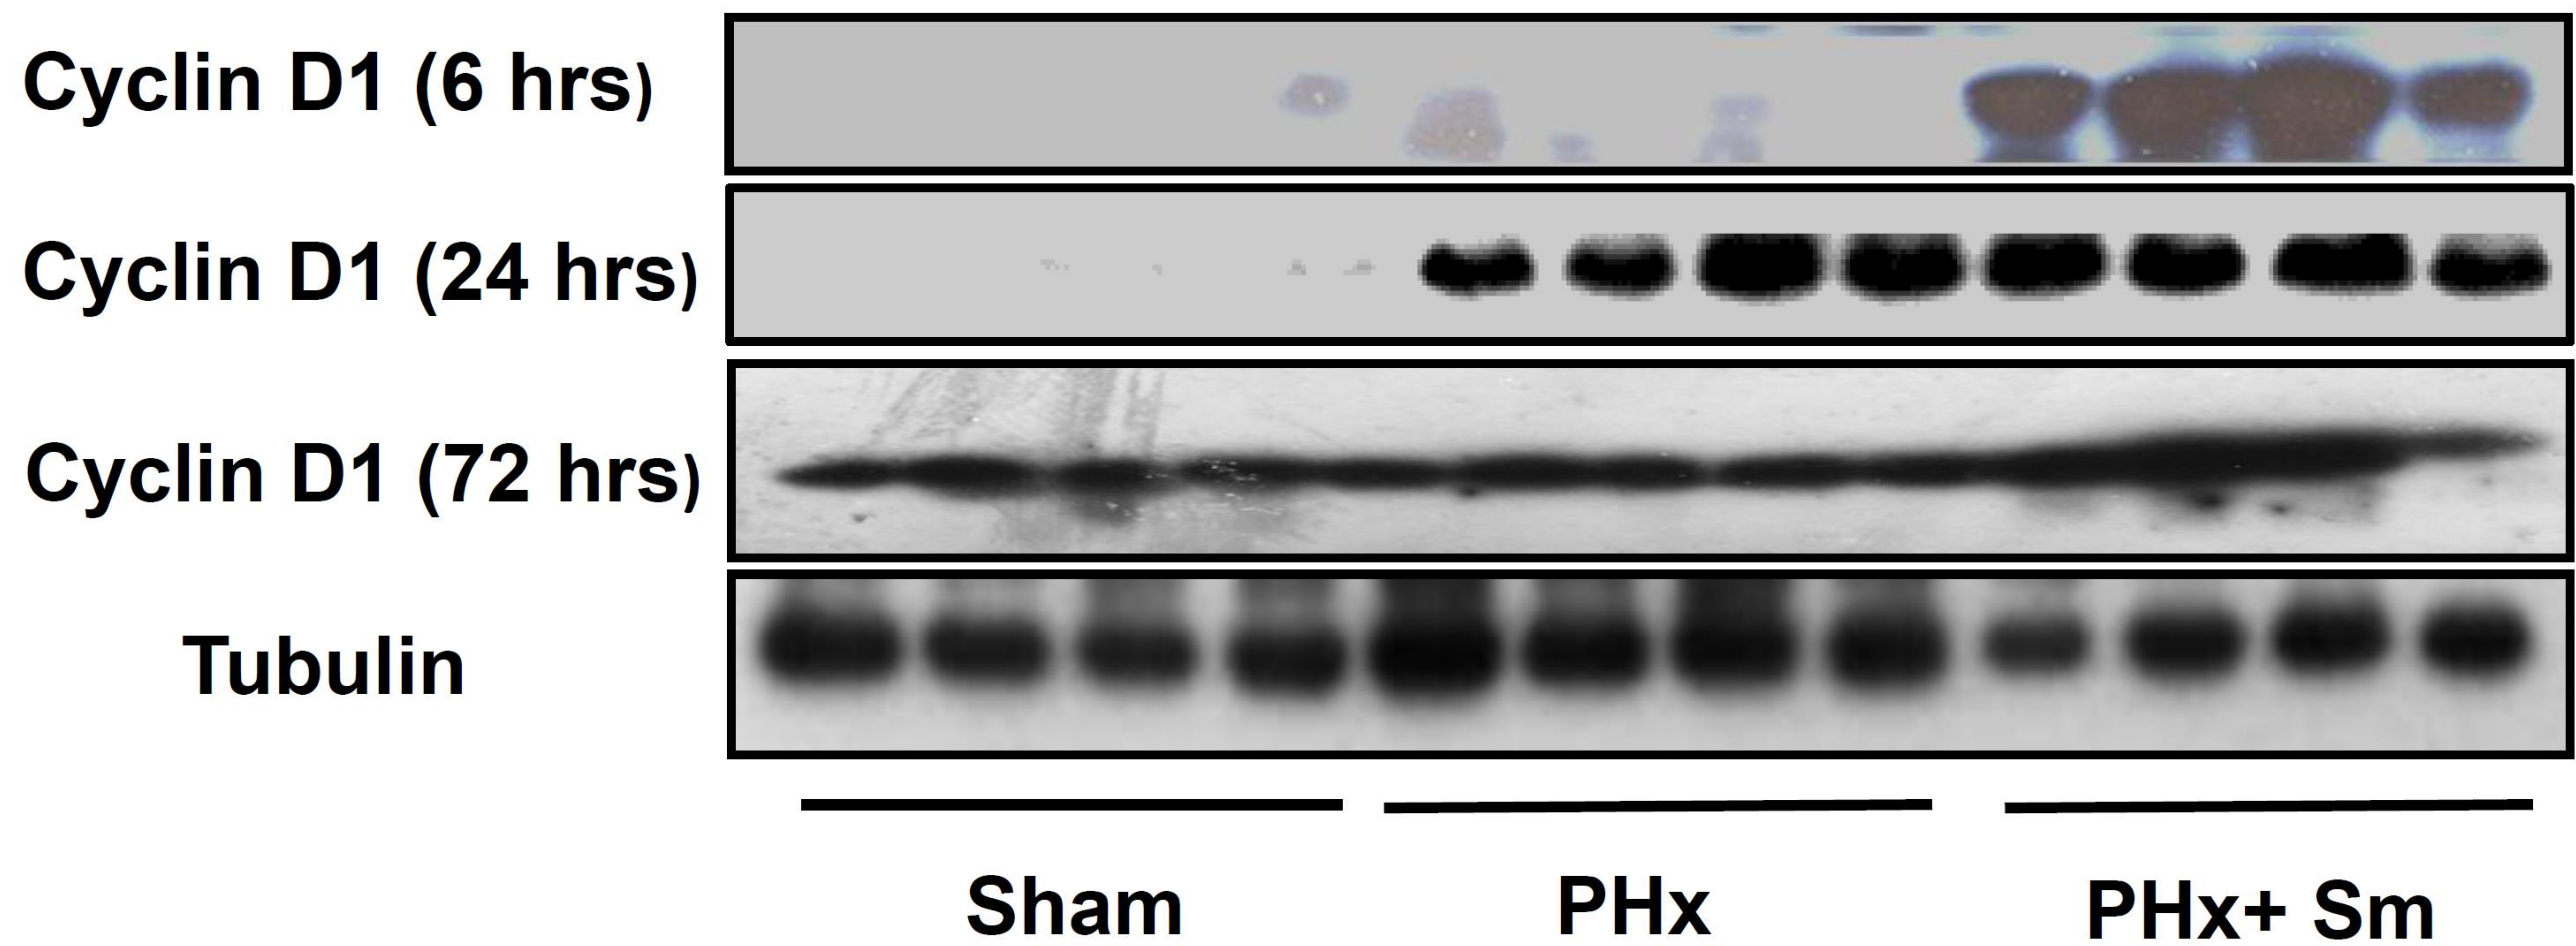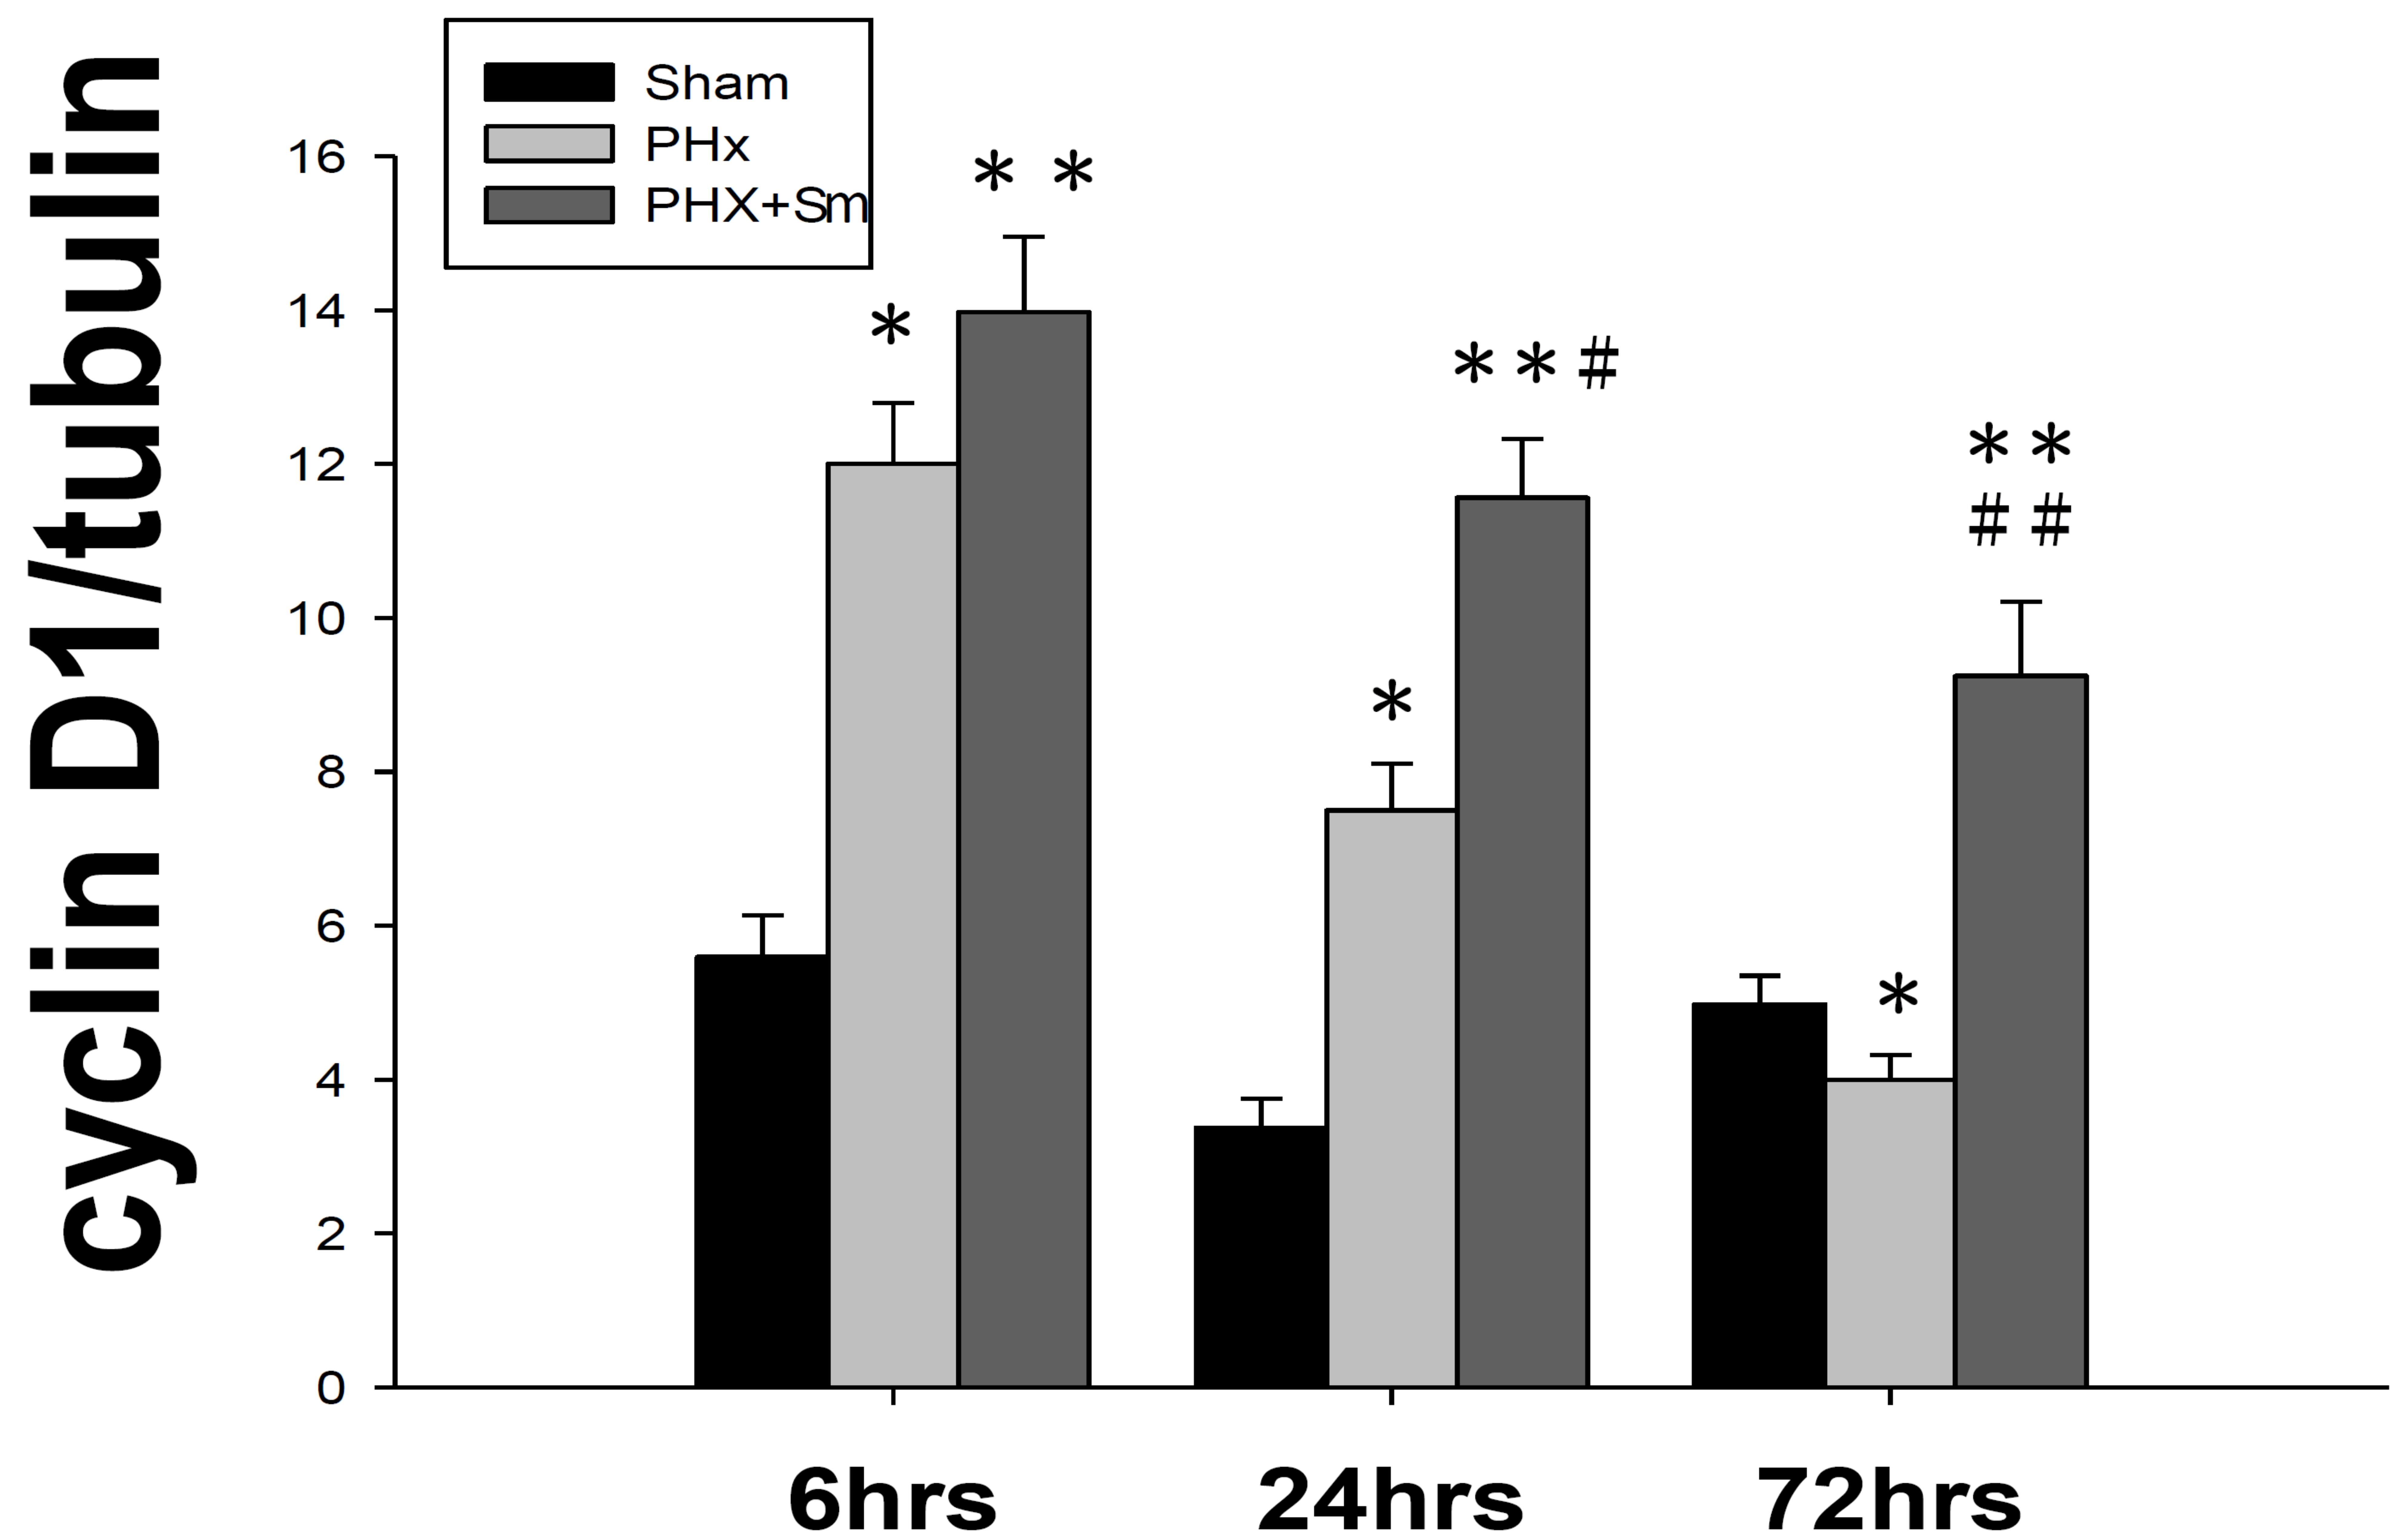



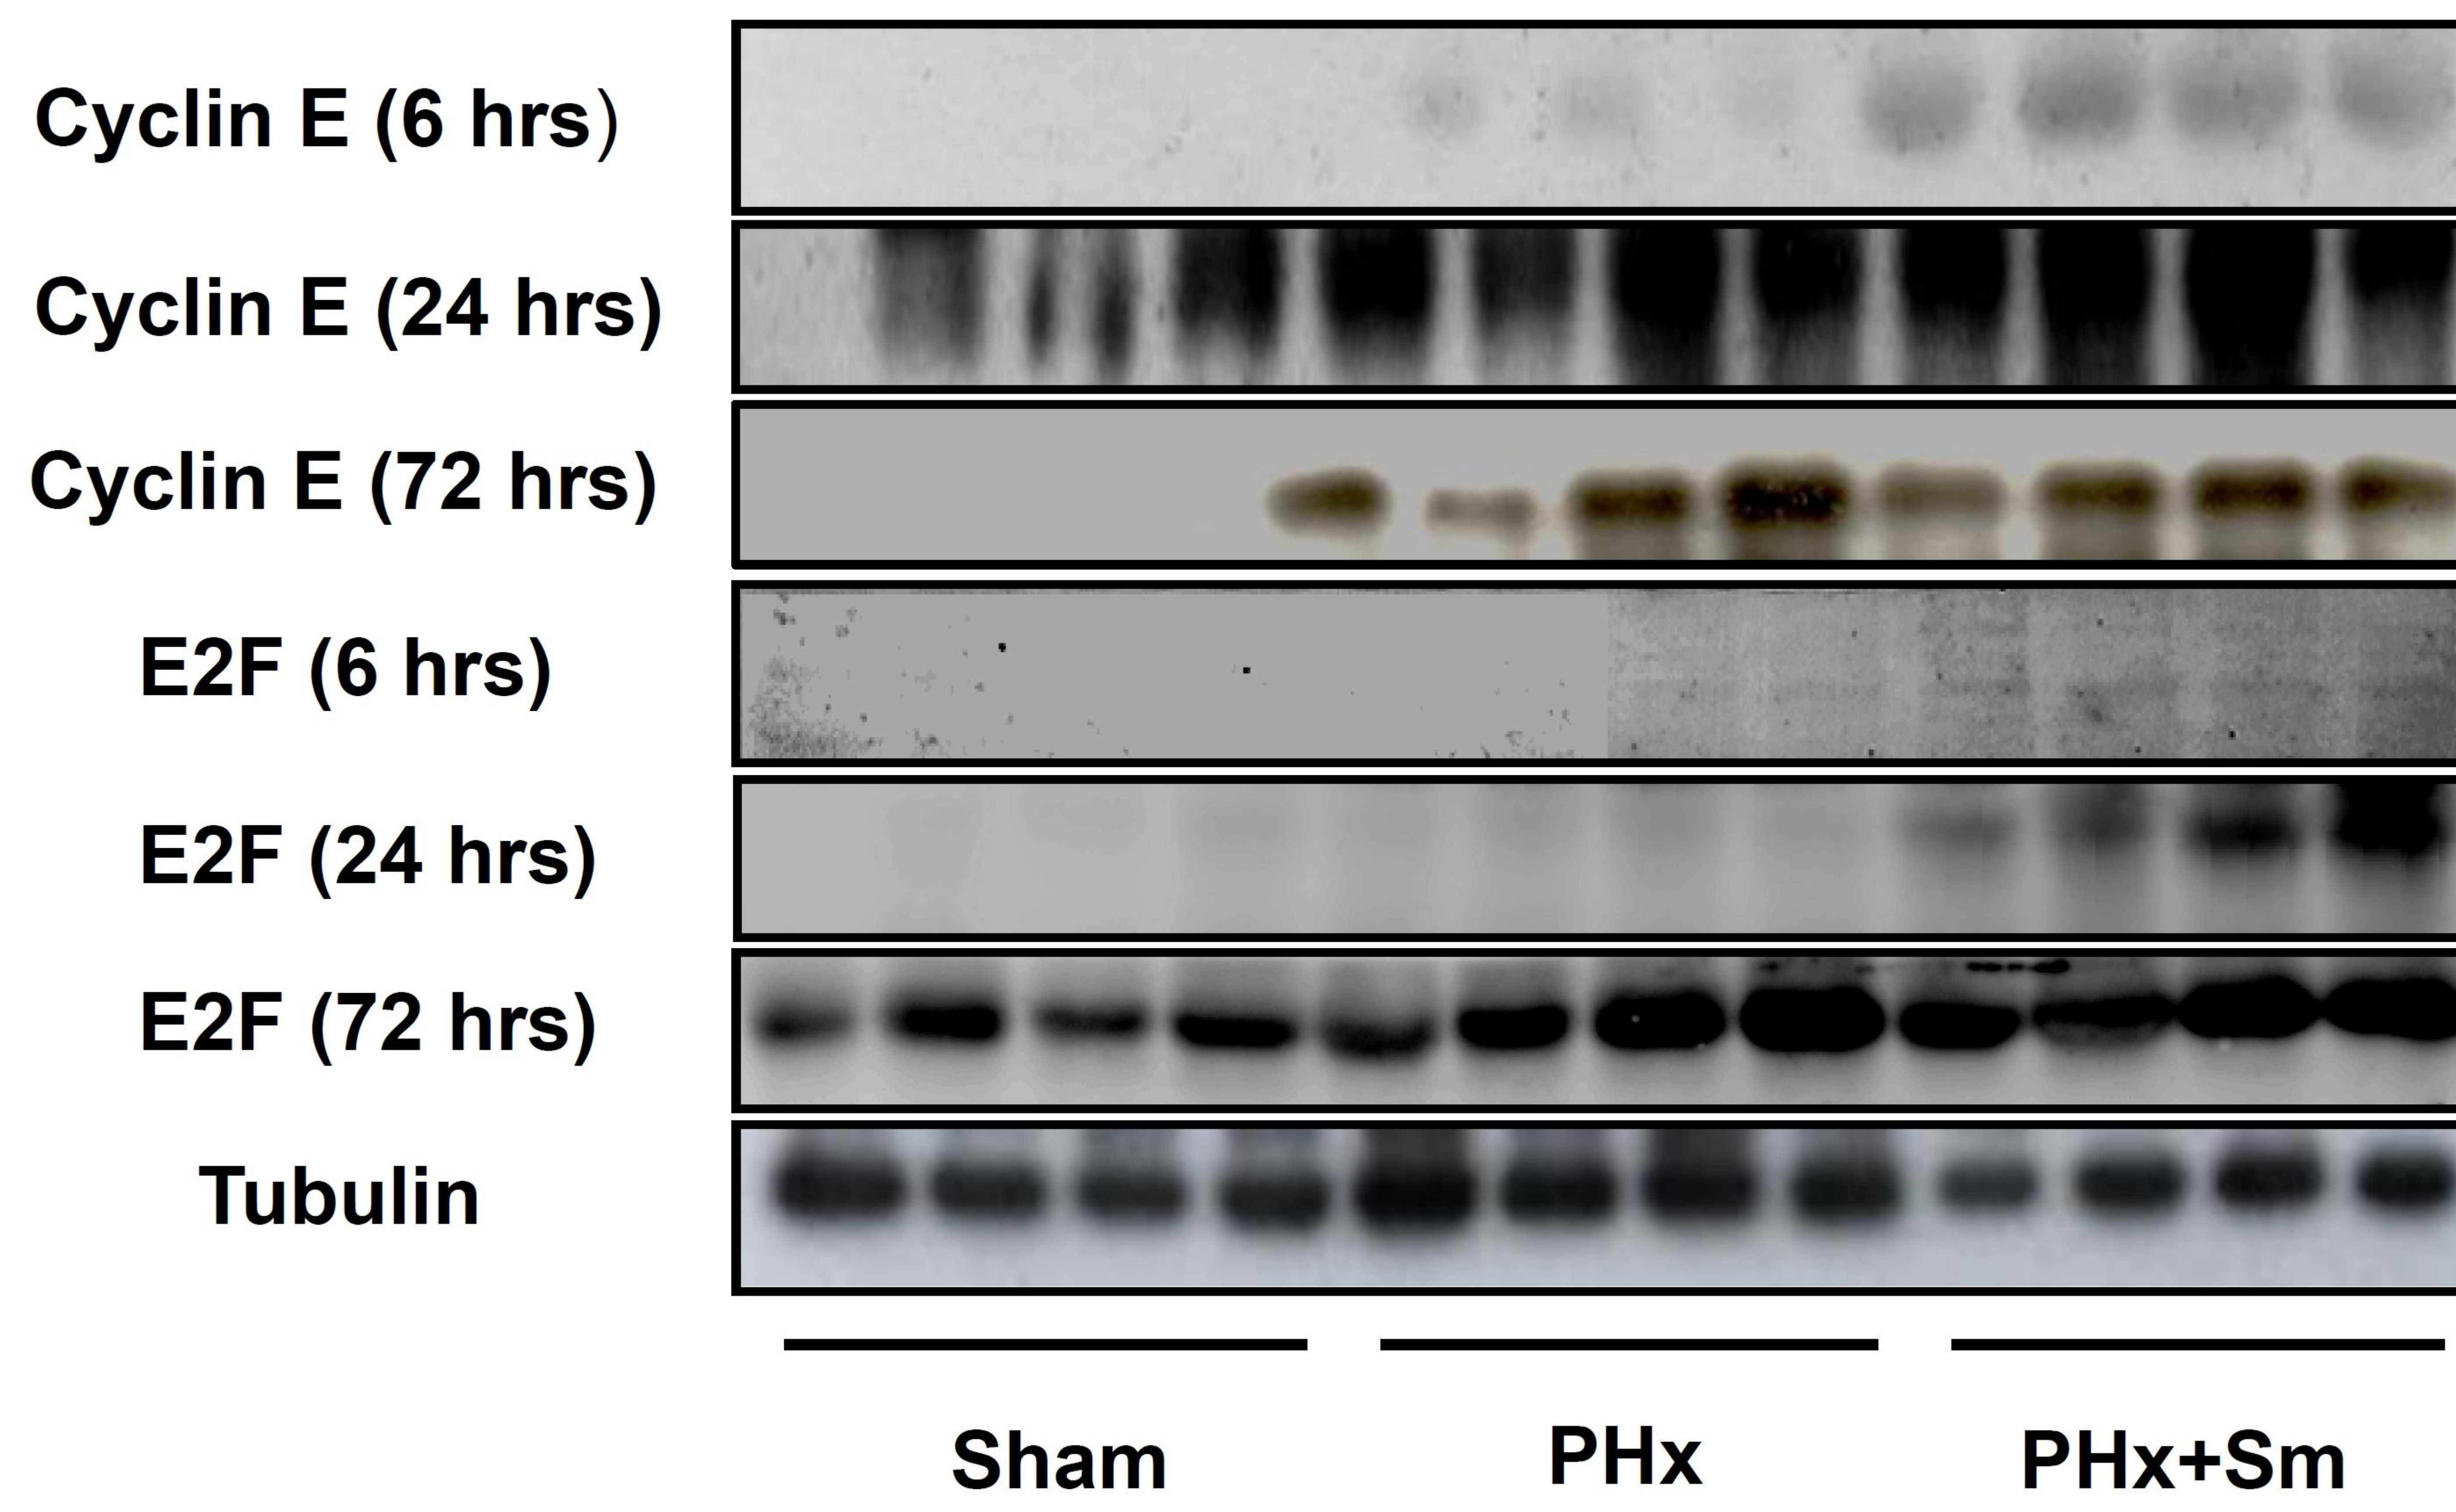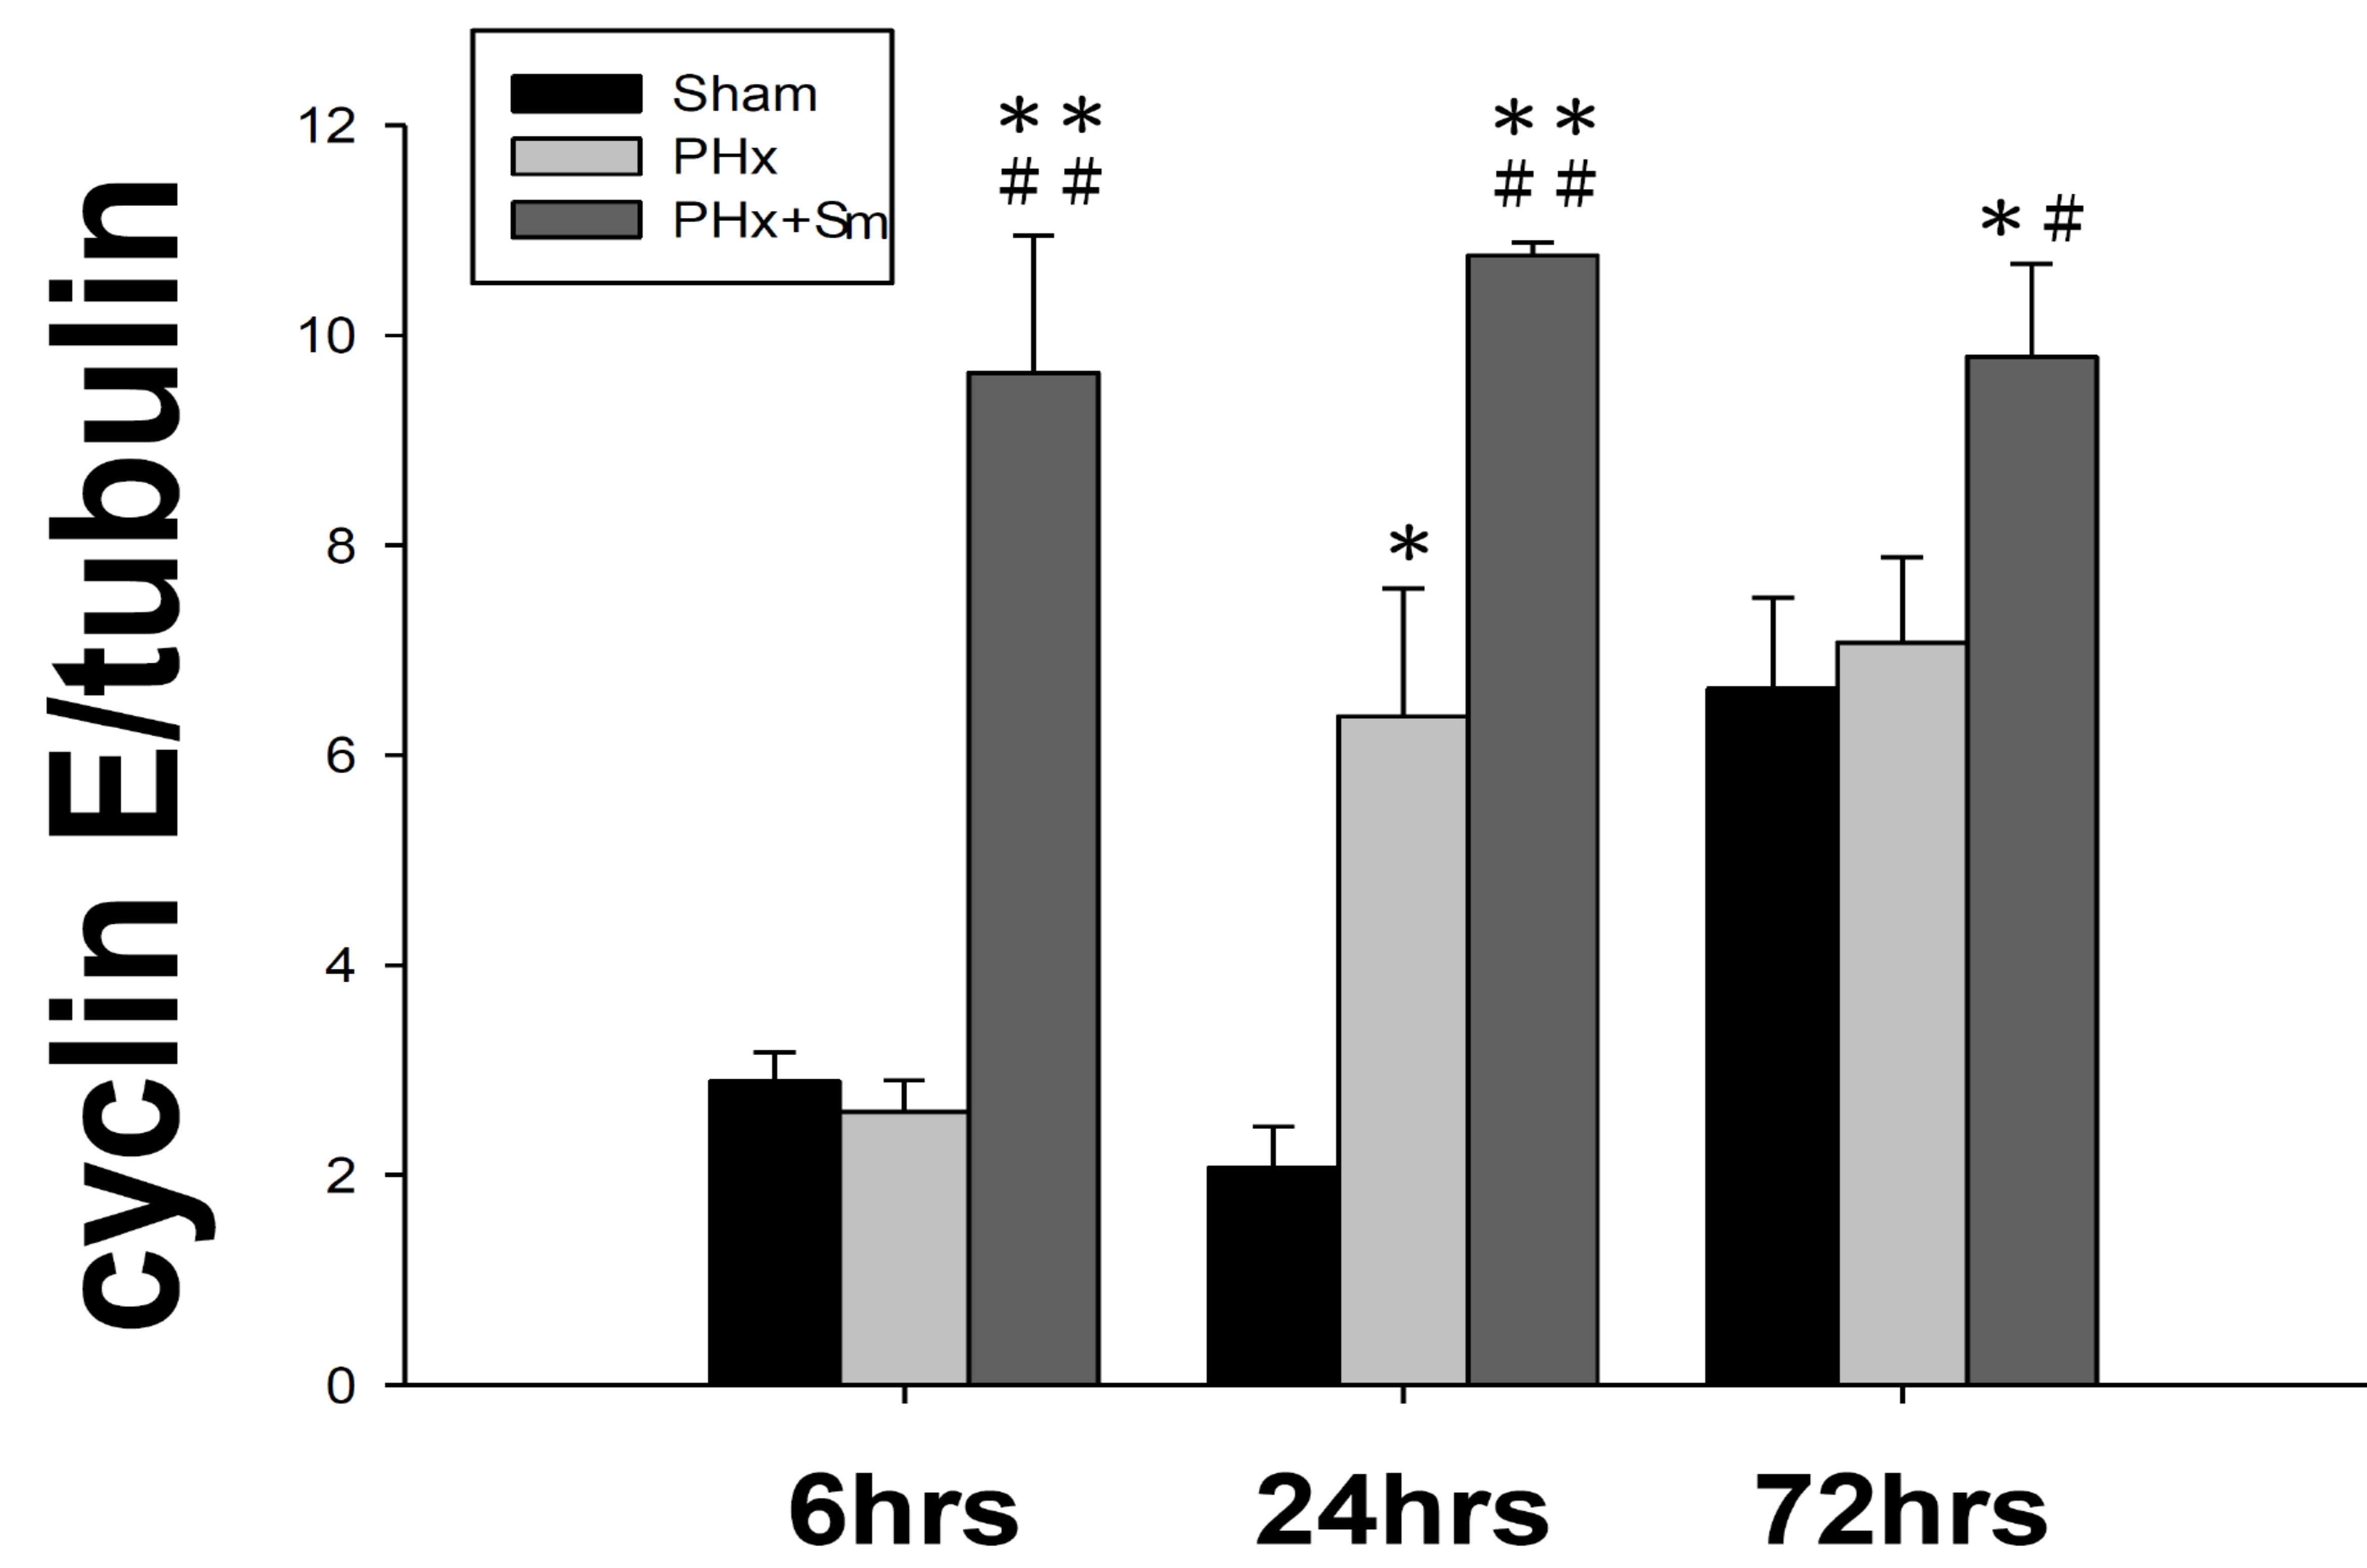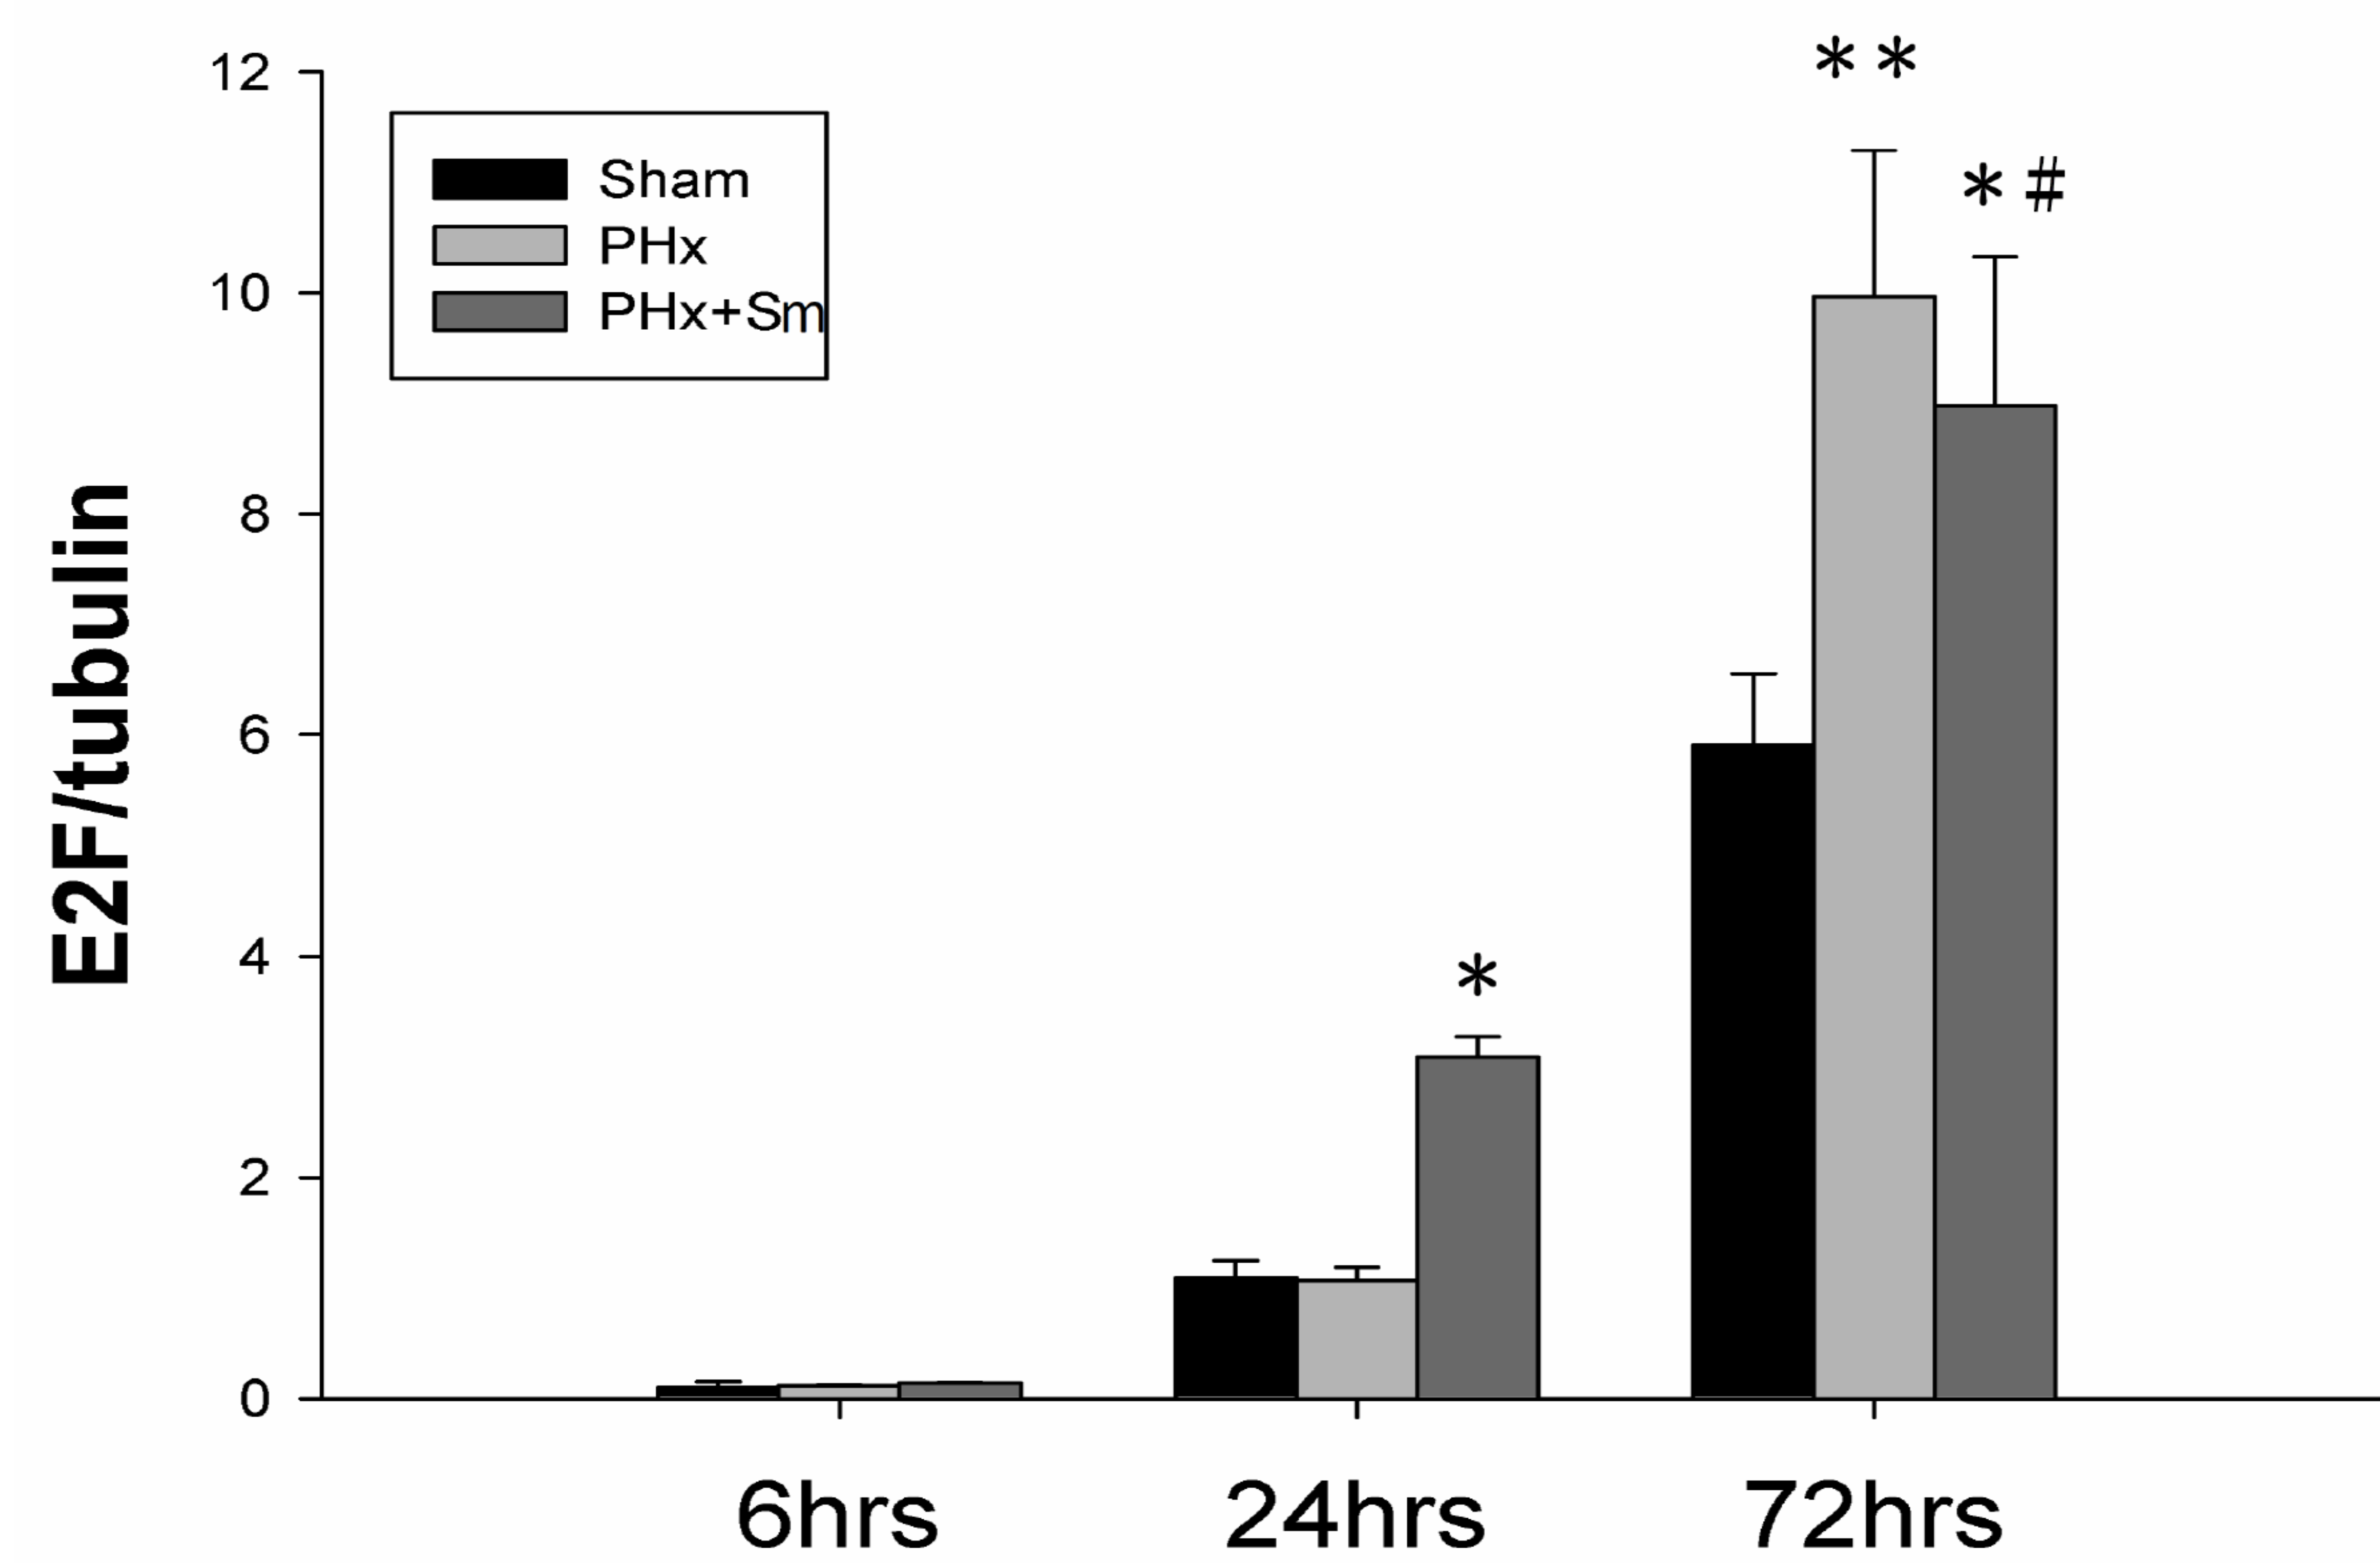



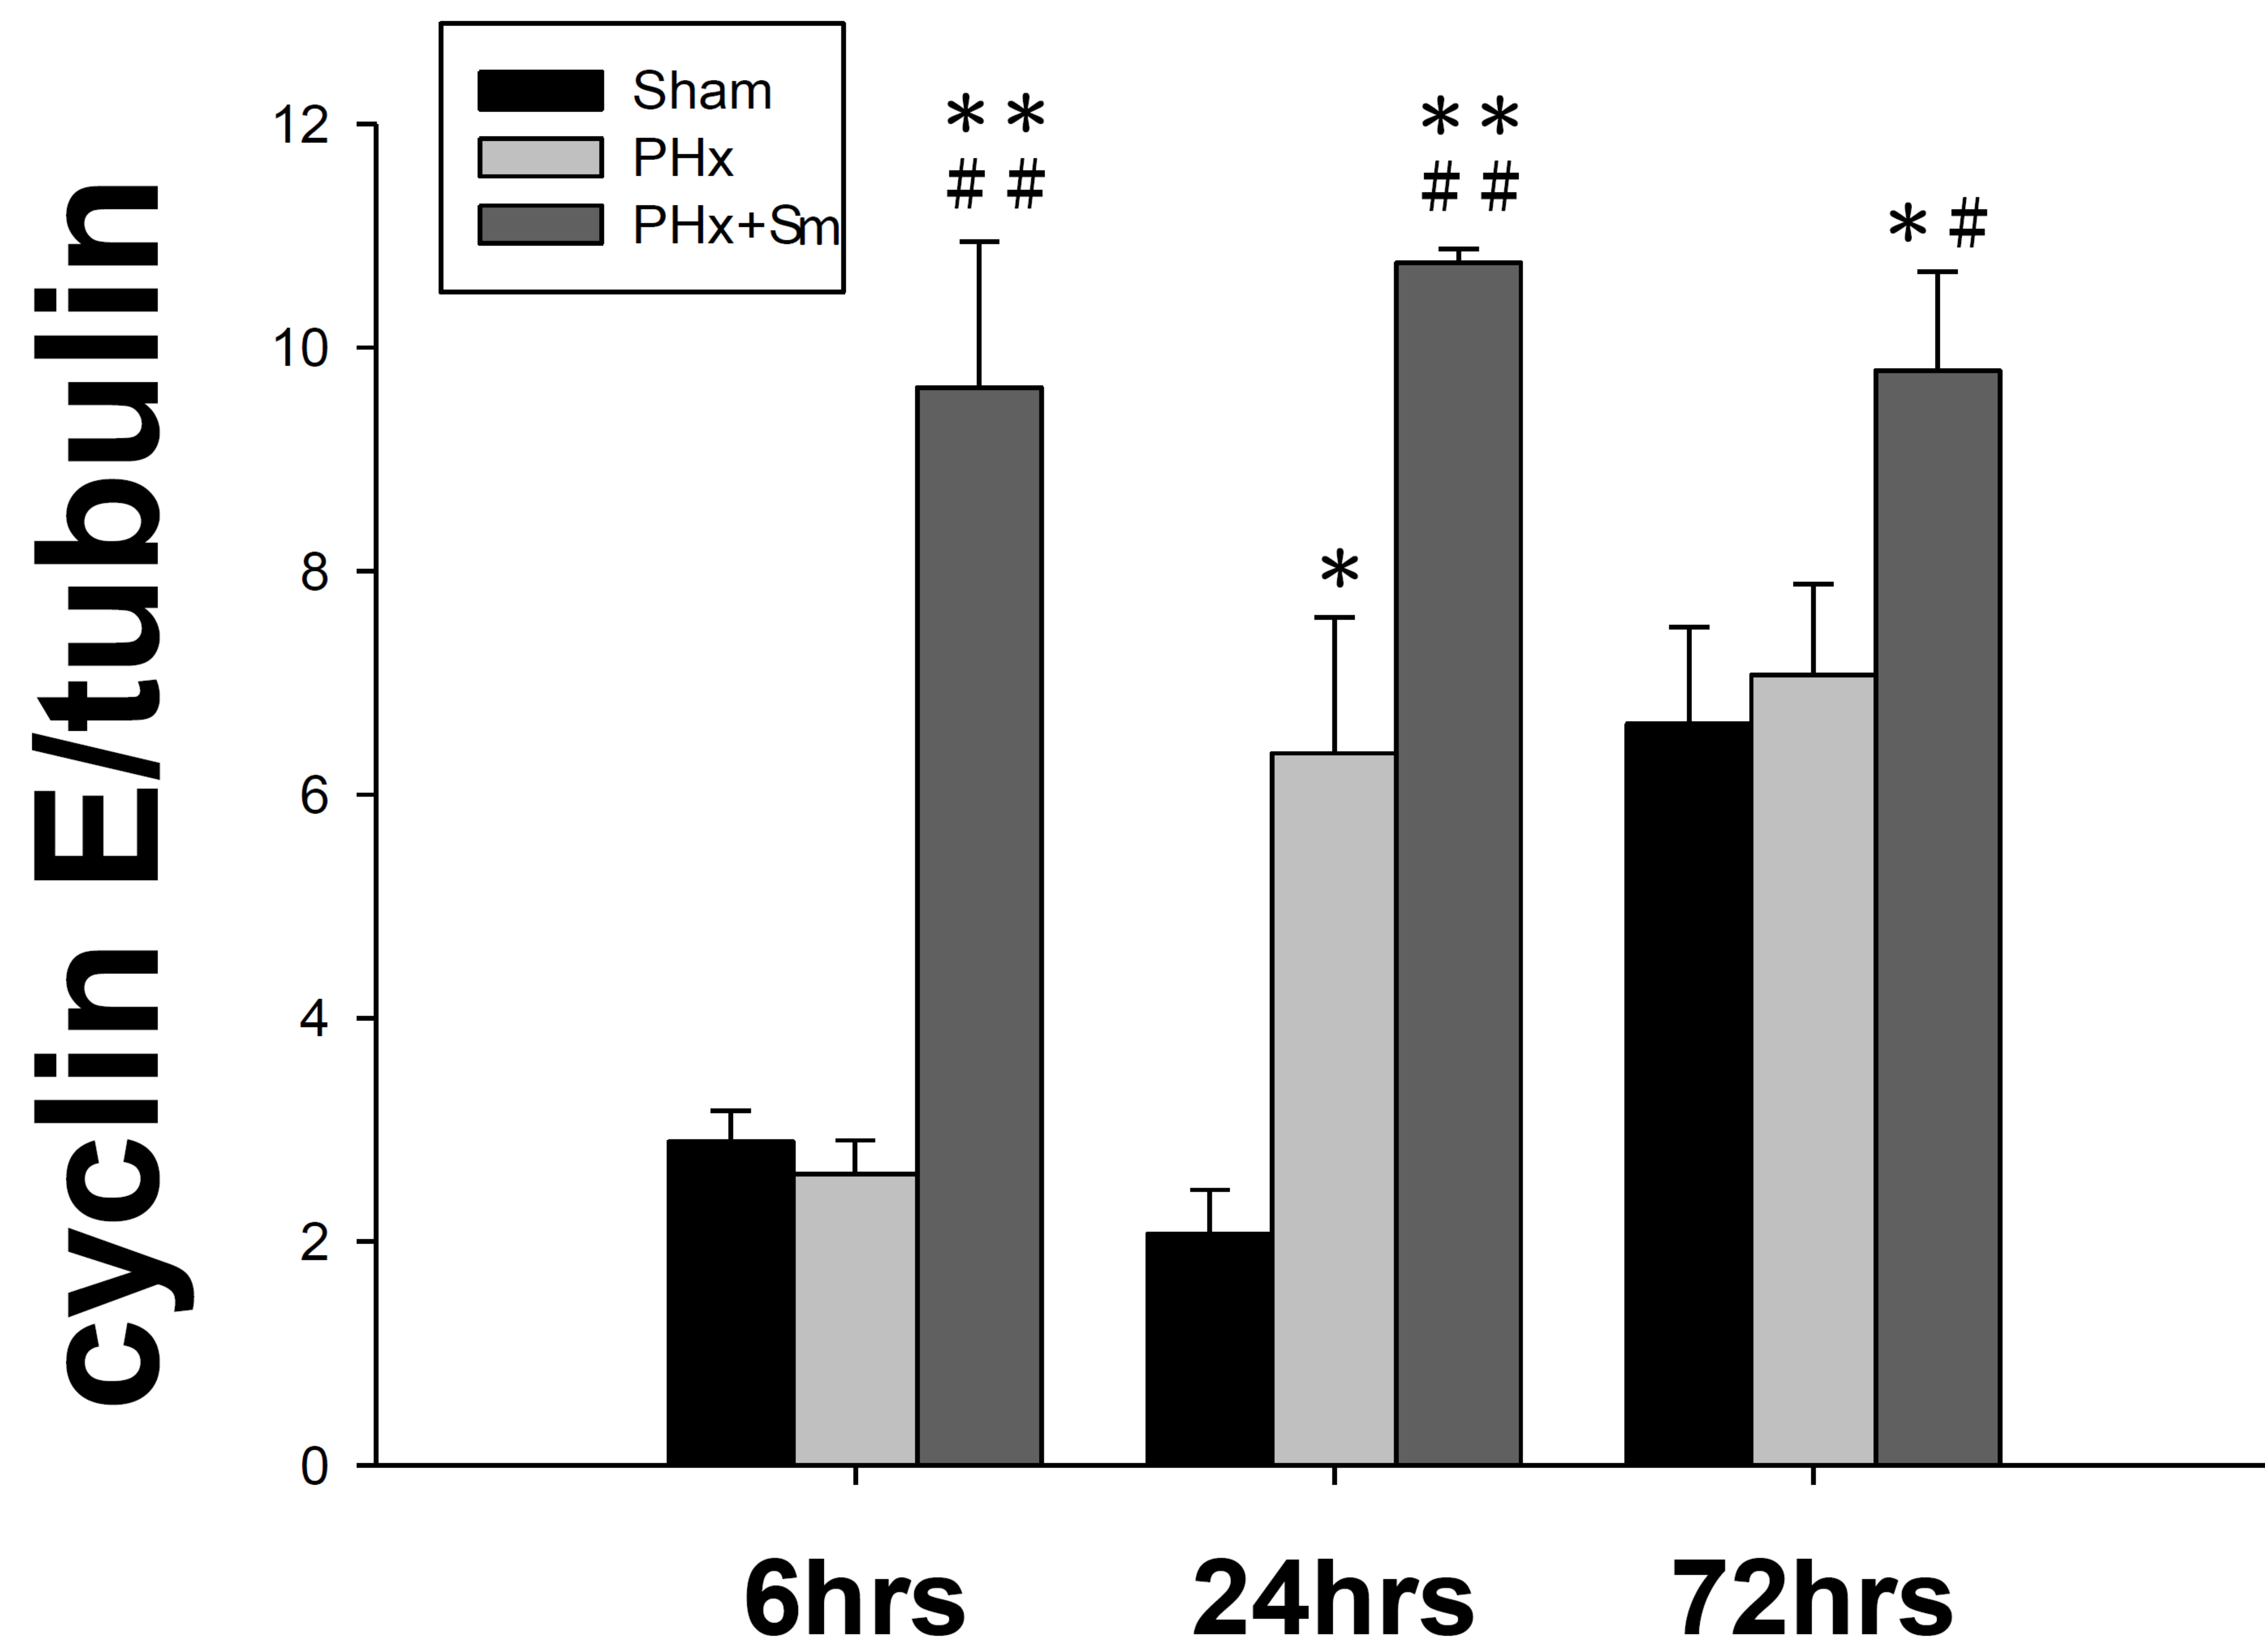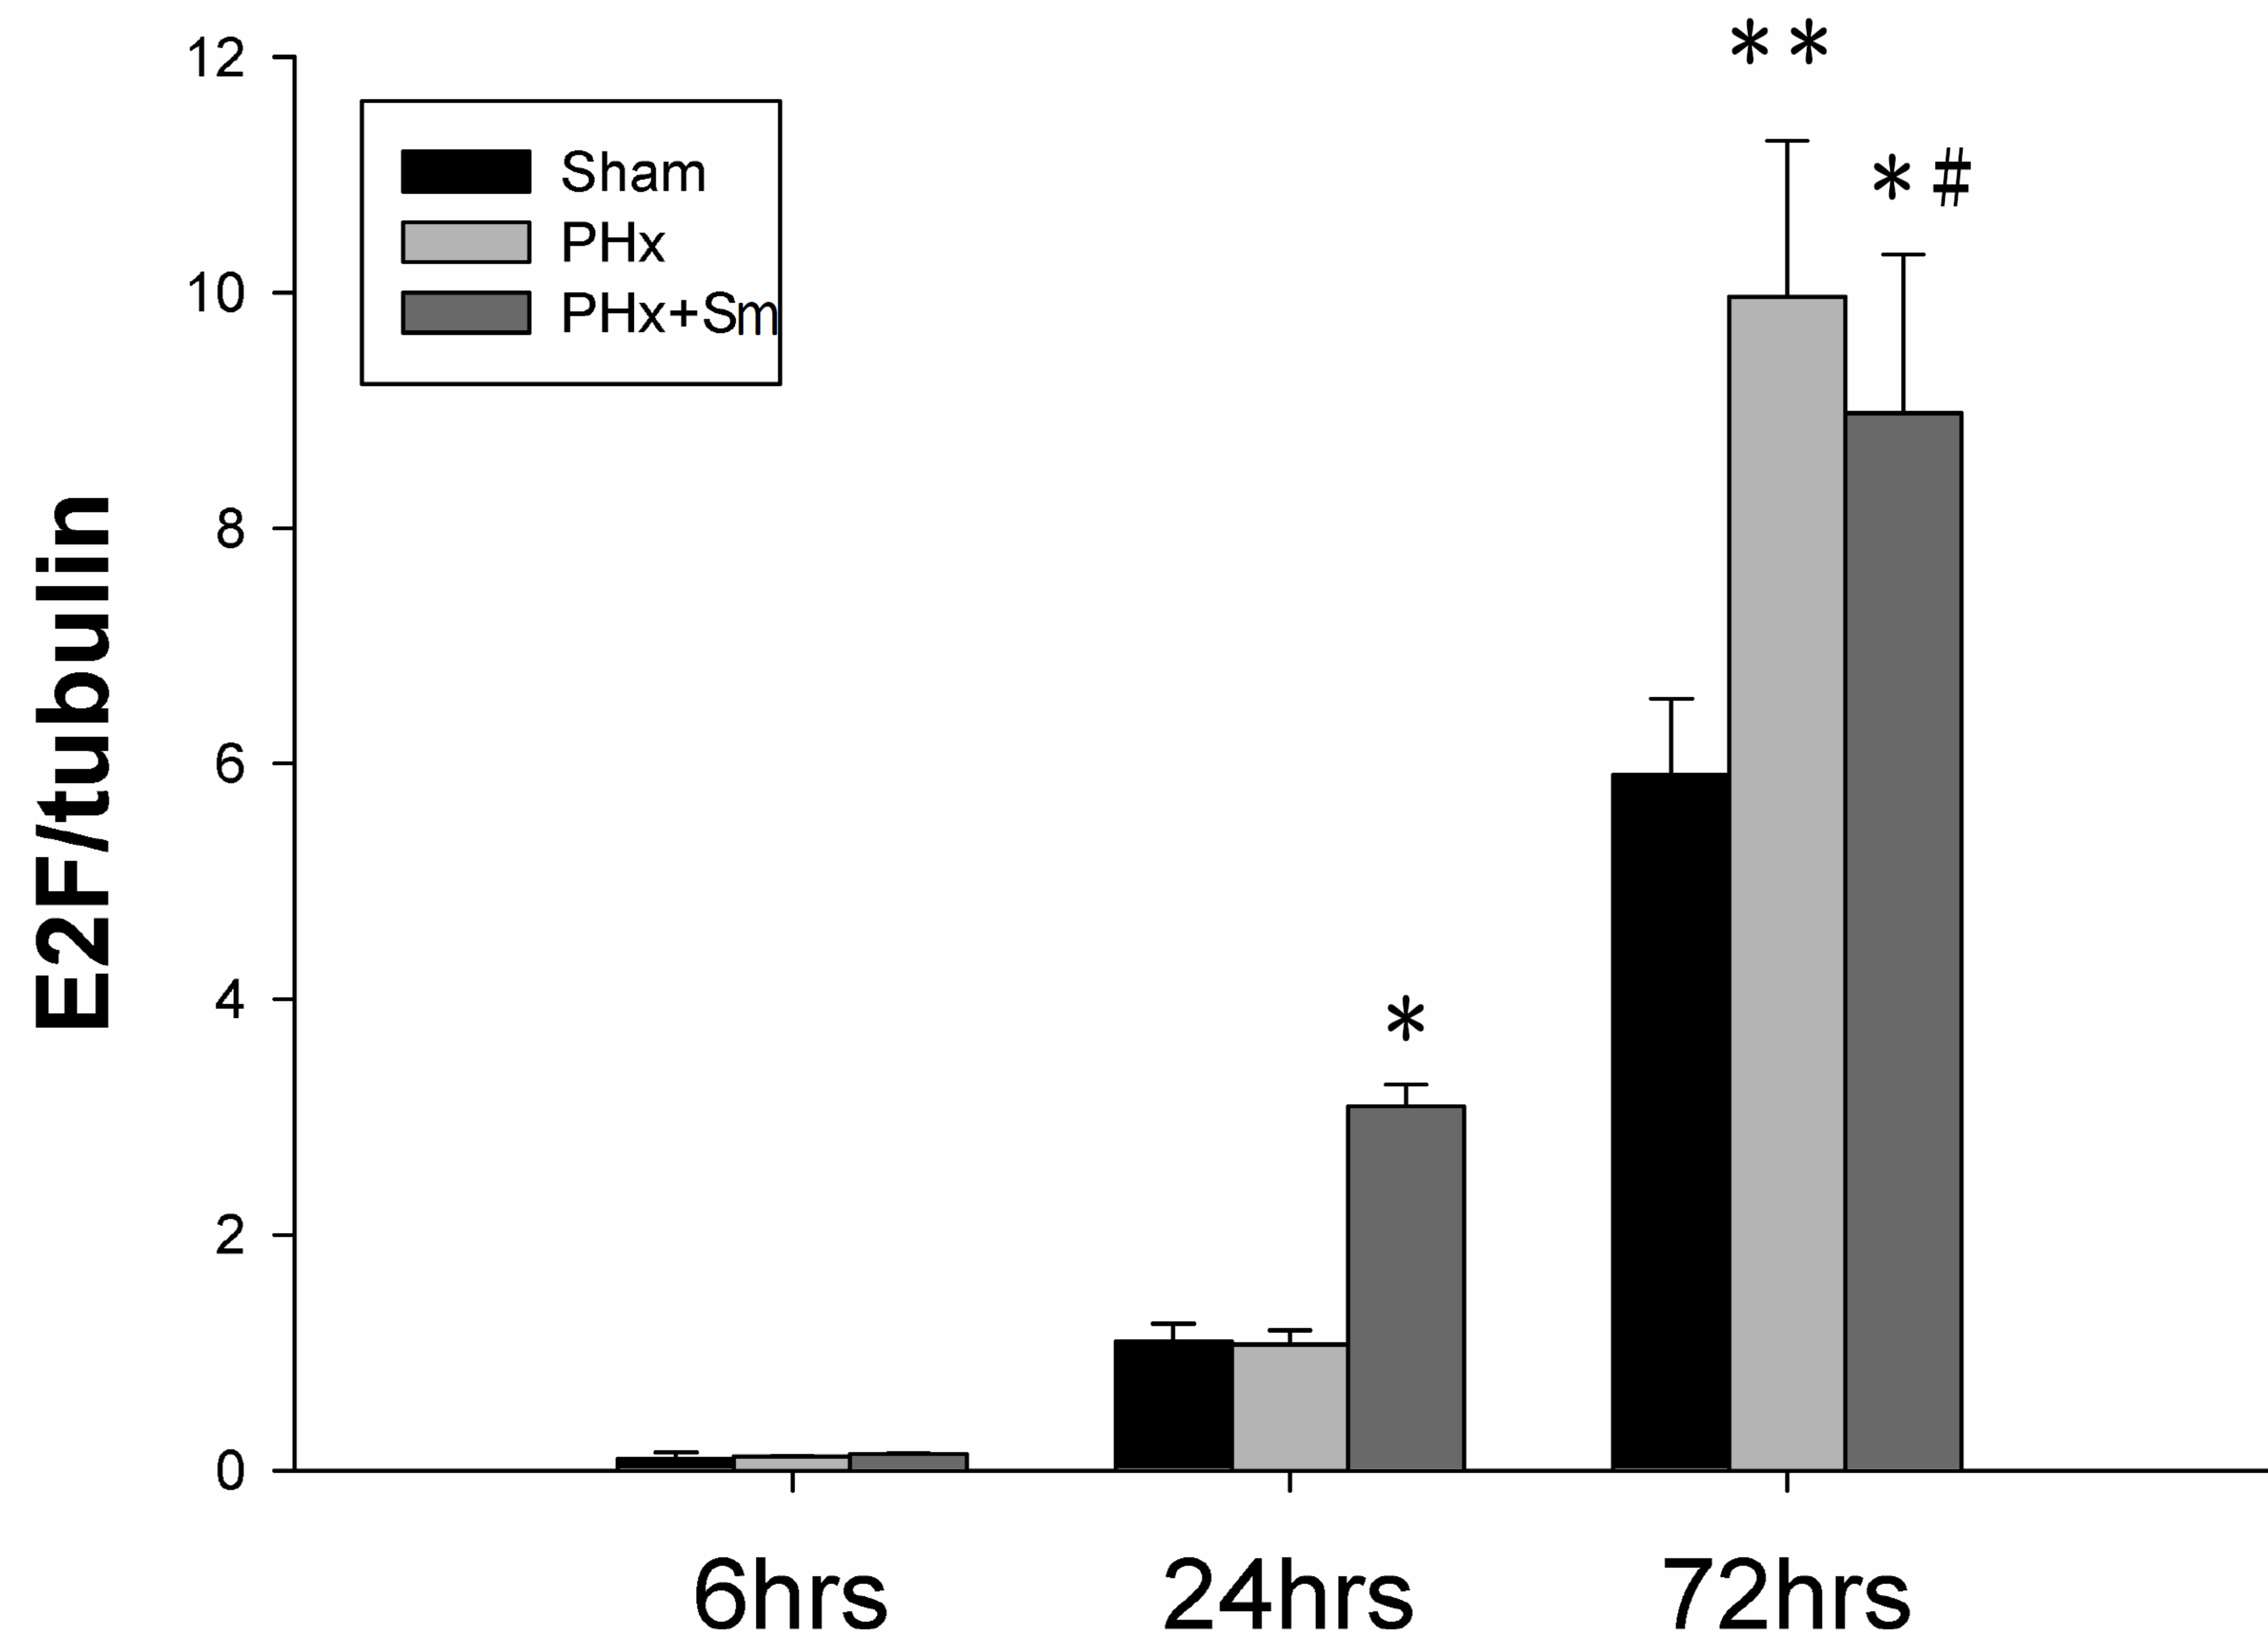

Supplement: f1 [file 4561243.f1.zip]
