# Supplementary material for: Retracted: The Effect of Elephantopus scaber L. on Liver Regeneration after Partial Hepatectomy
Source: Hindawi journal article supplement (doi:10.1155/2017/4561243), 2017-01-01
Supplement: f1 [file 4561243.f1.zip]

Archive with 3 entries (3 files):
- Figure 2.pdf
- Figure 3.pdf
- Figure 5.pdf
