# Supplementary figures and images for: Retracted: The Effect of Elephantopus scaber L. on Liver Regeneration after Partial Hepatectomy
Source: Hindawi journal article supplement (doi:10.1155/2017/4561243), 2017-01-01

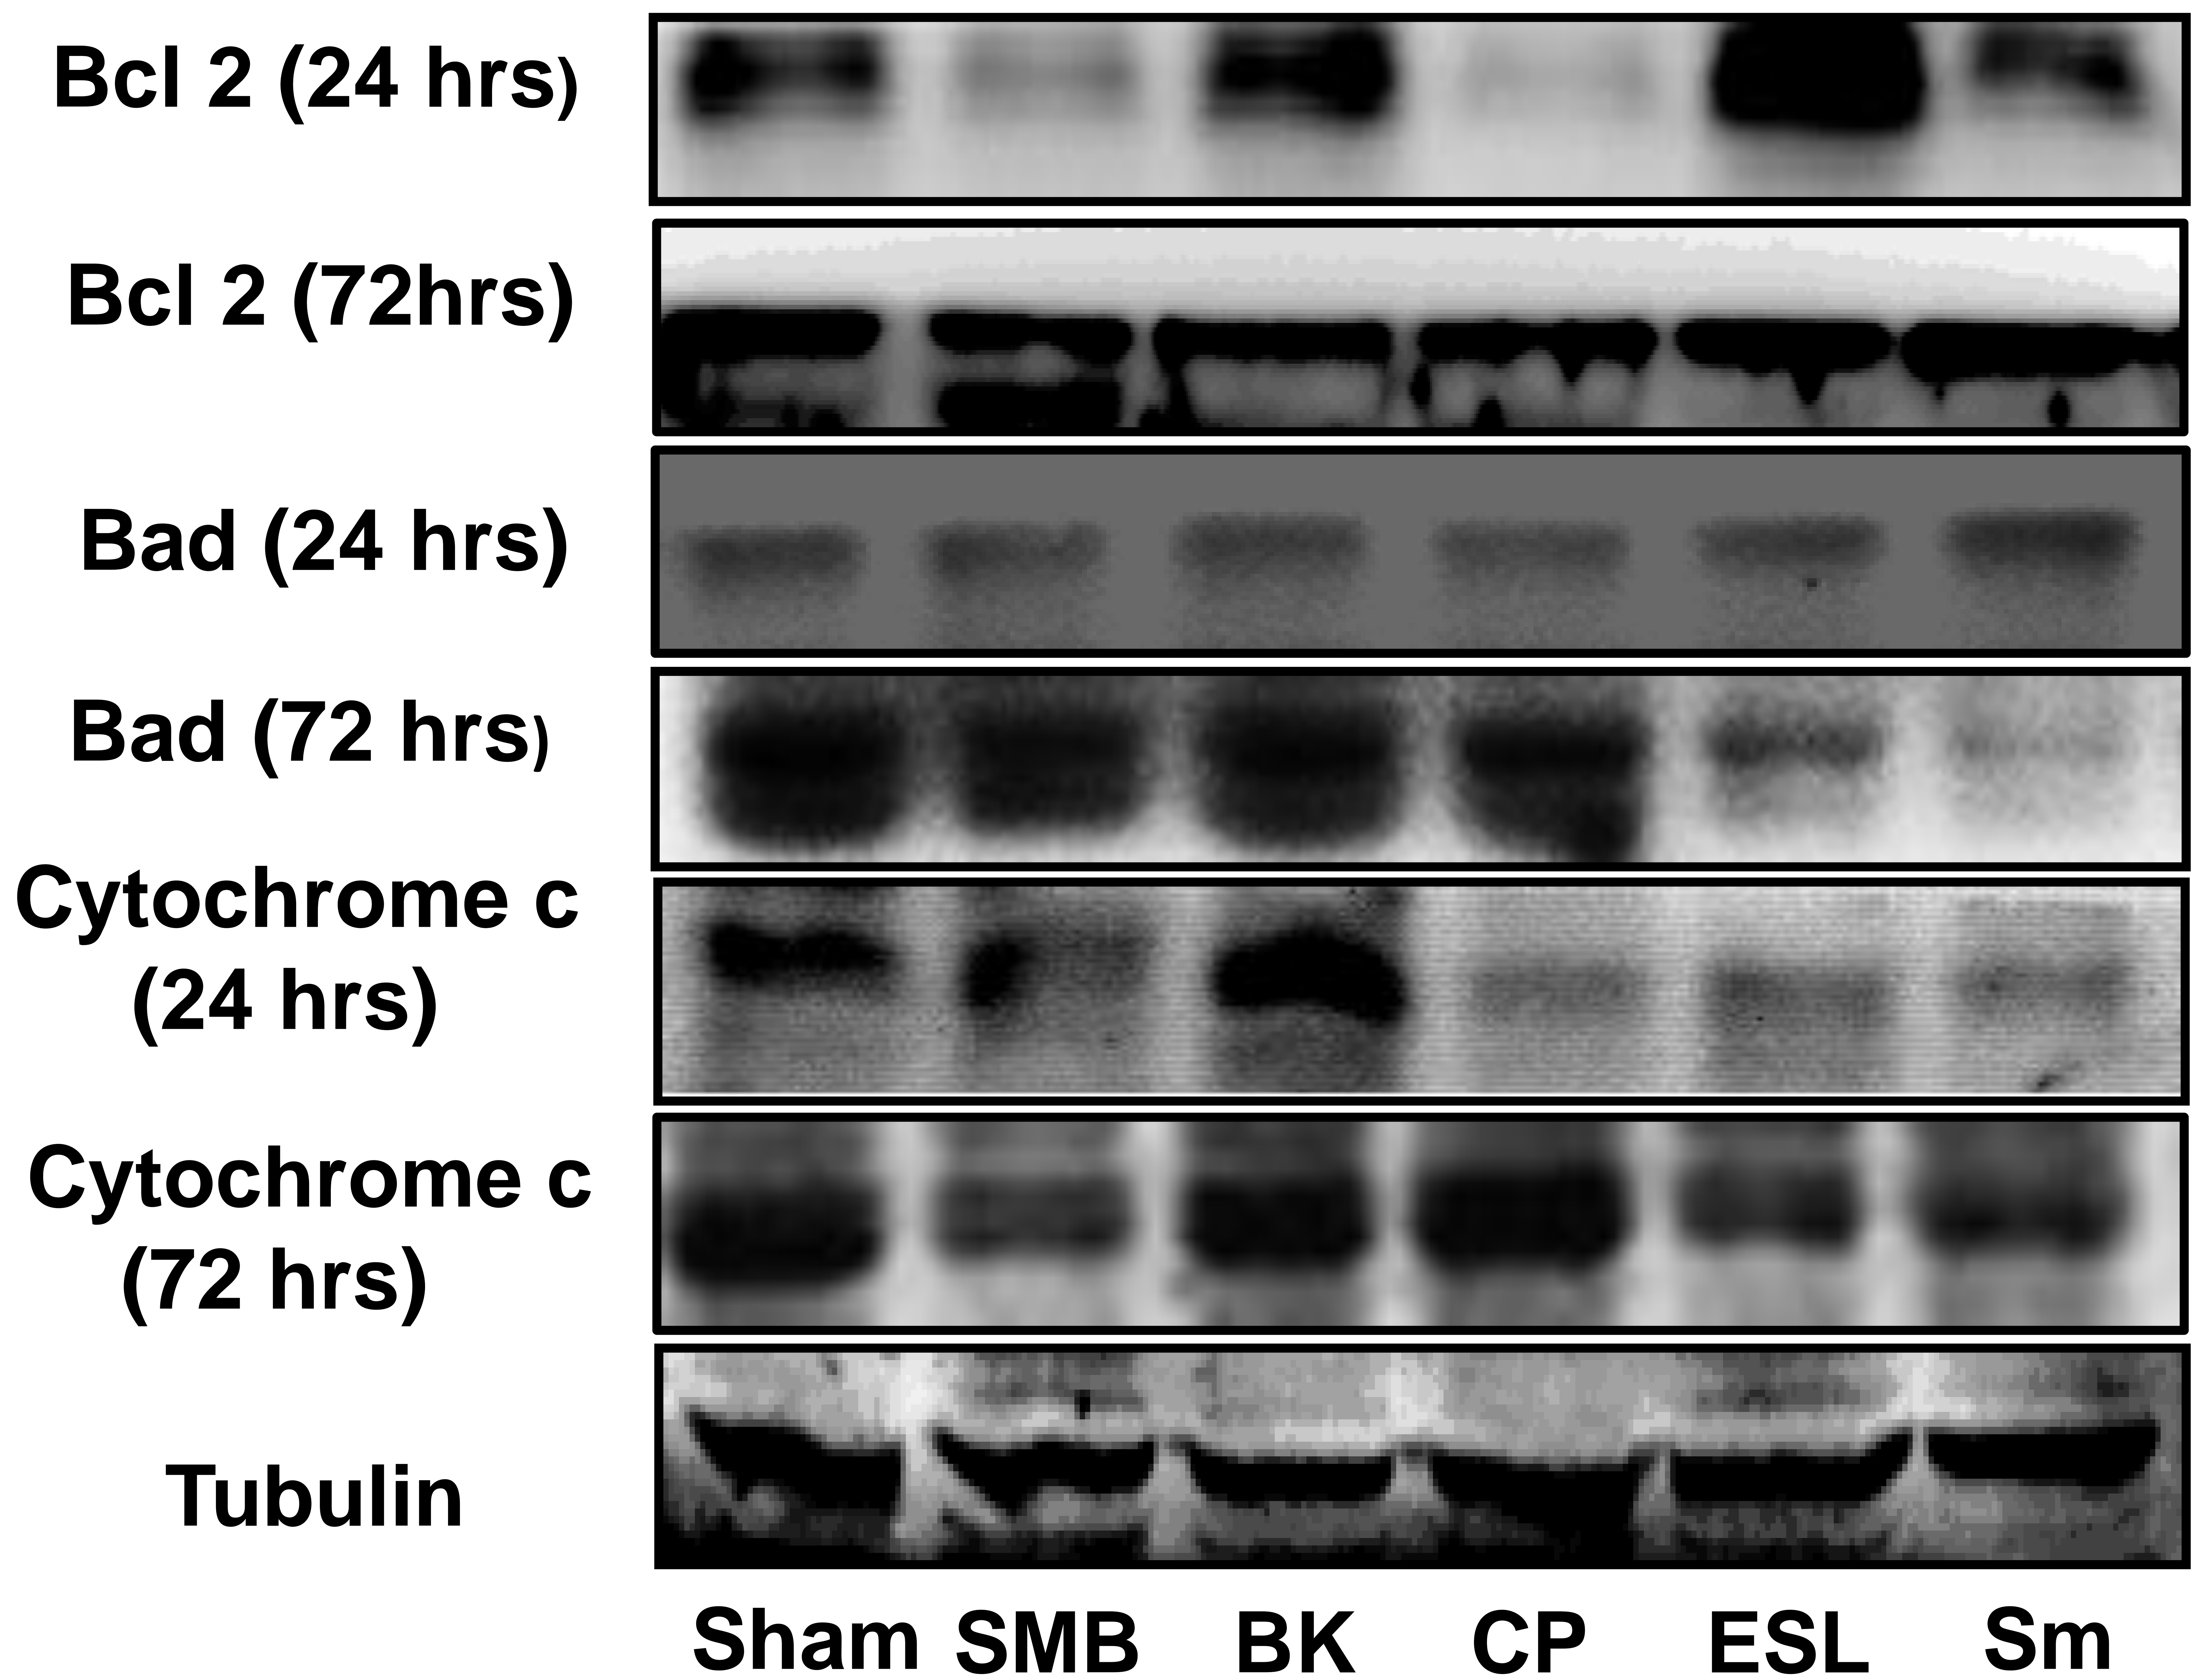

**(a)**



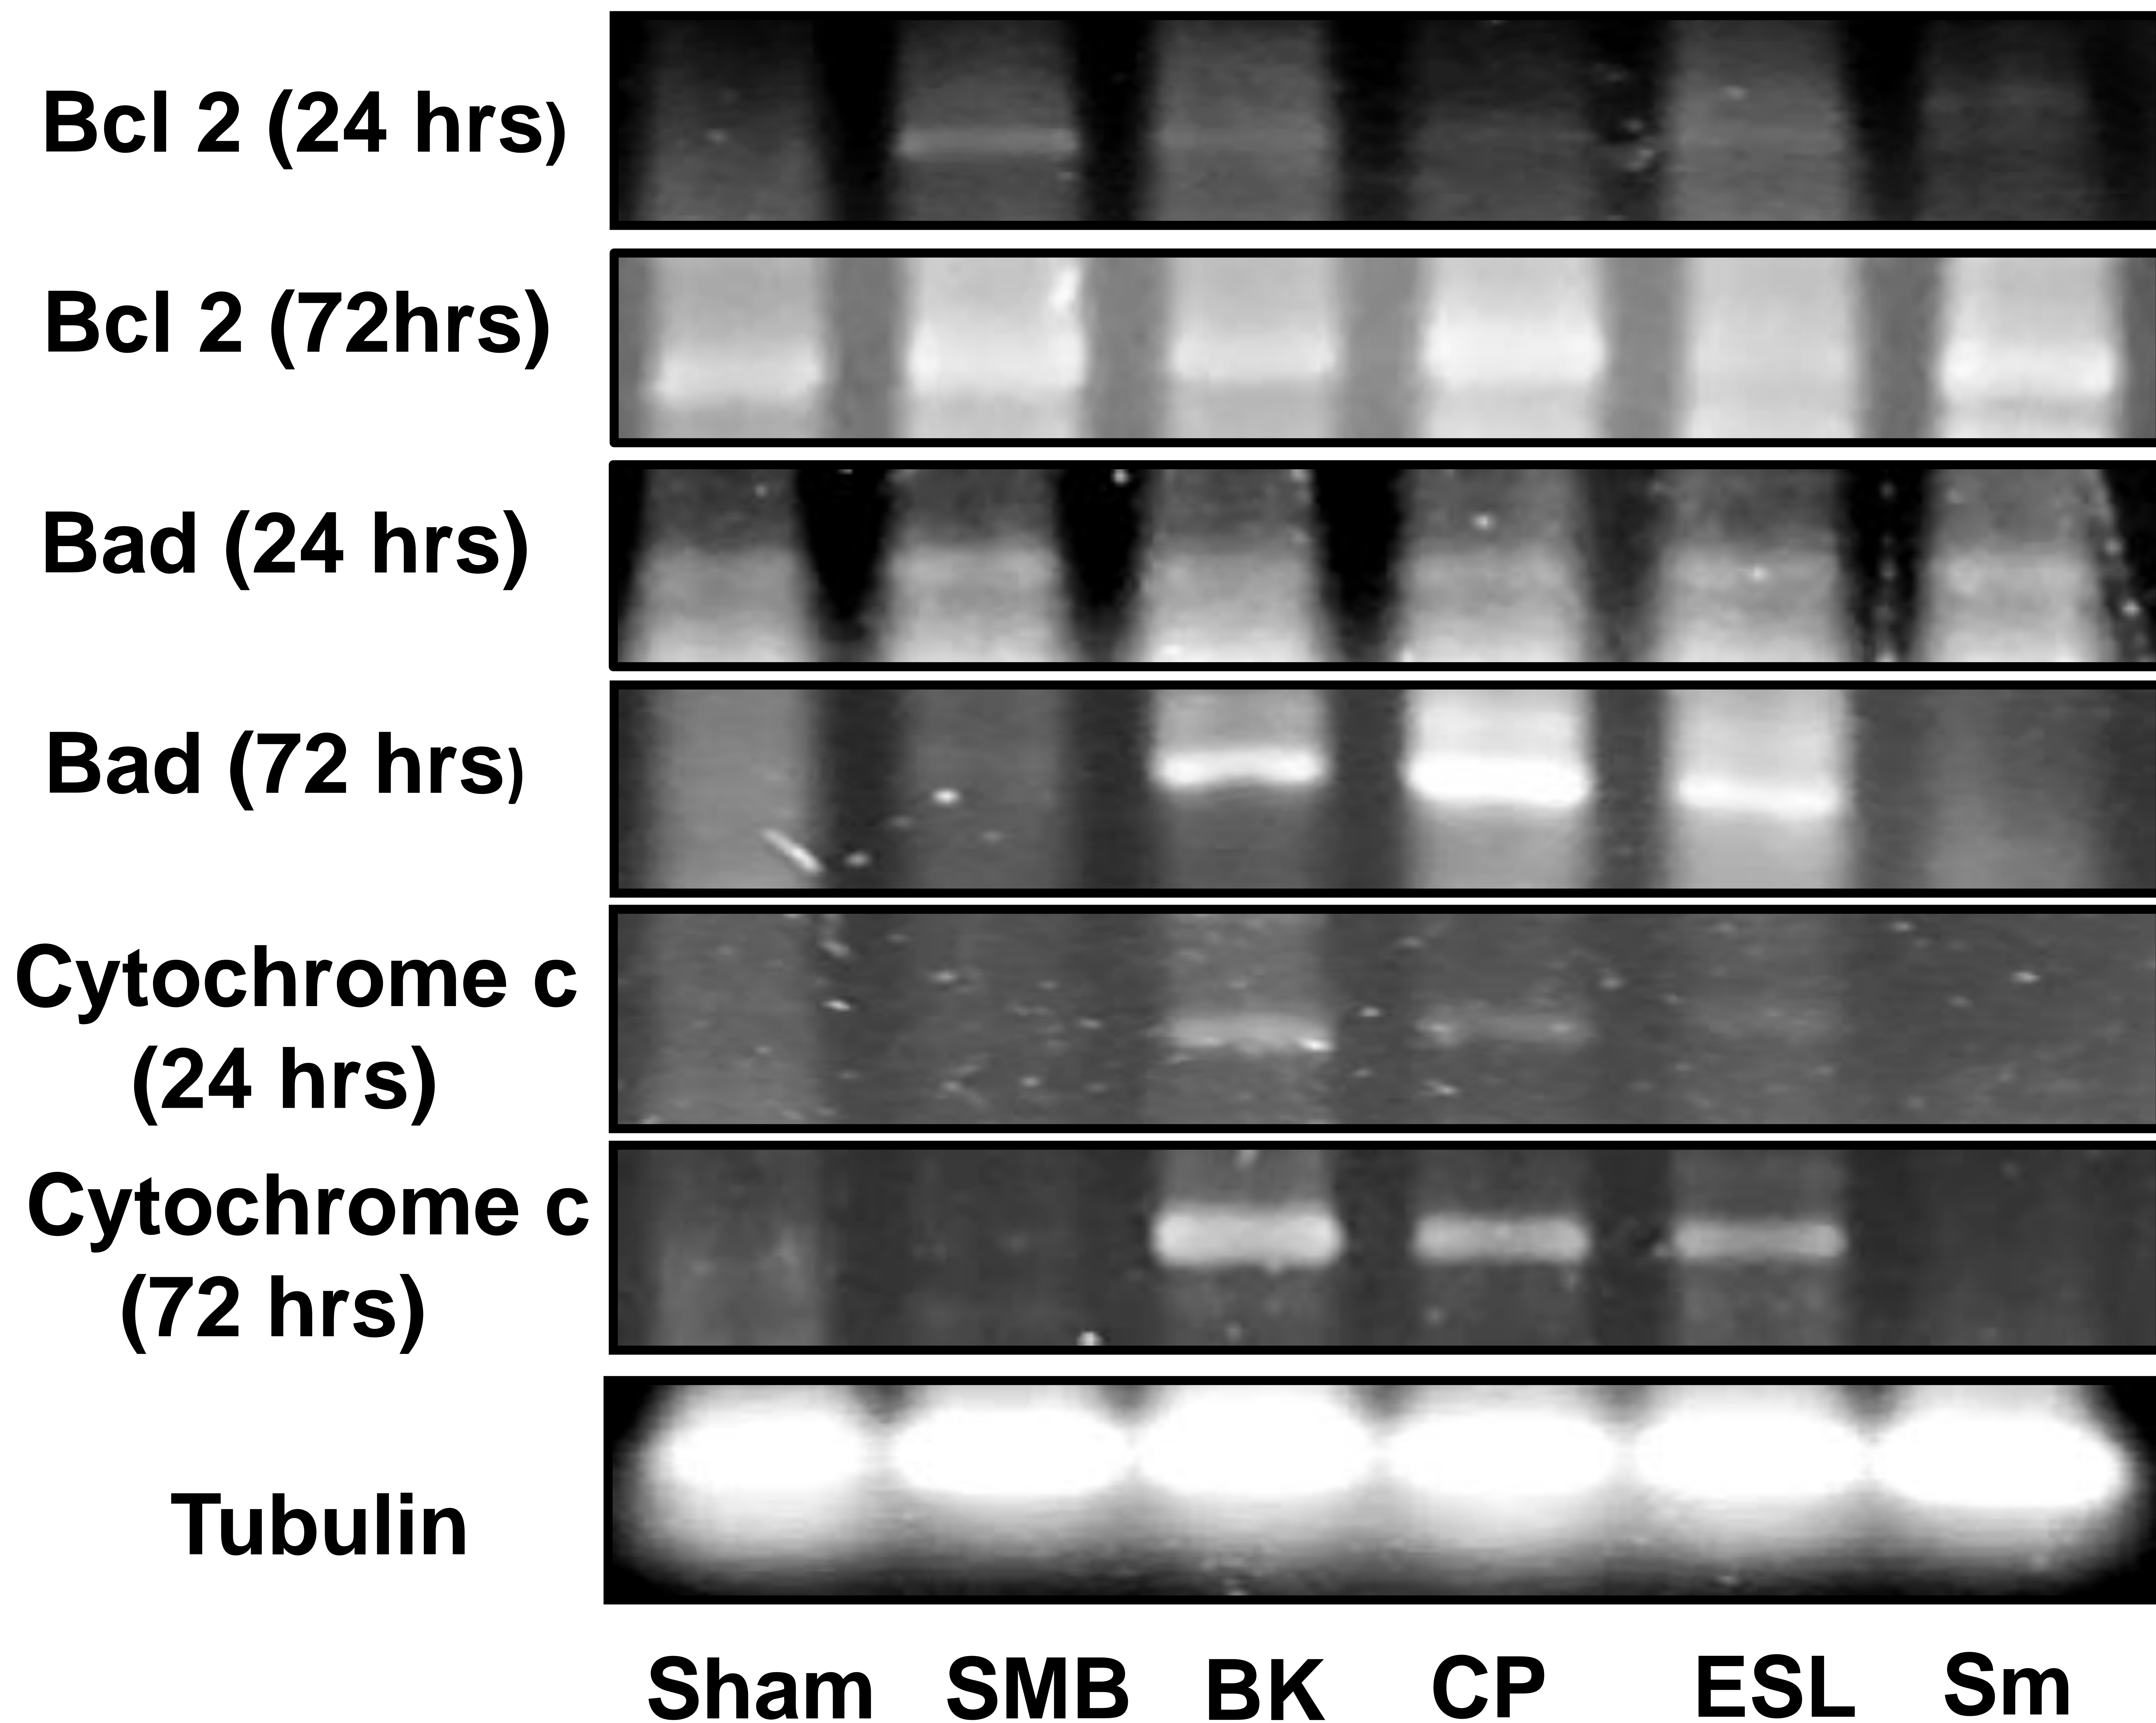

(b)



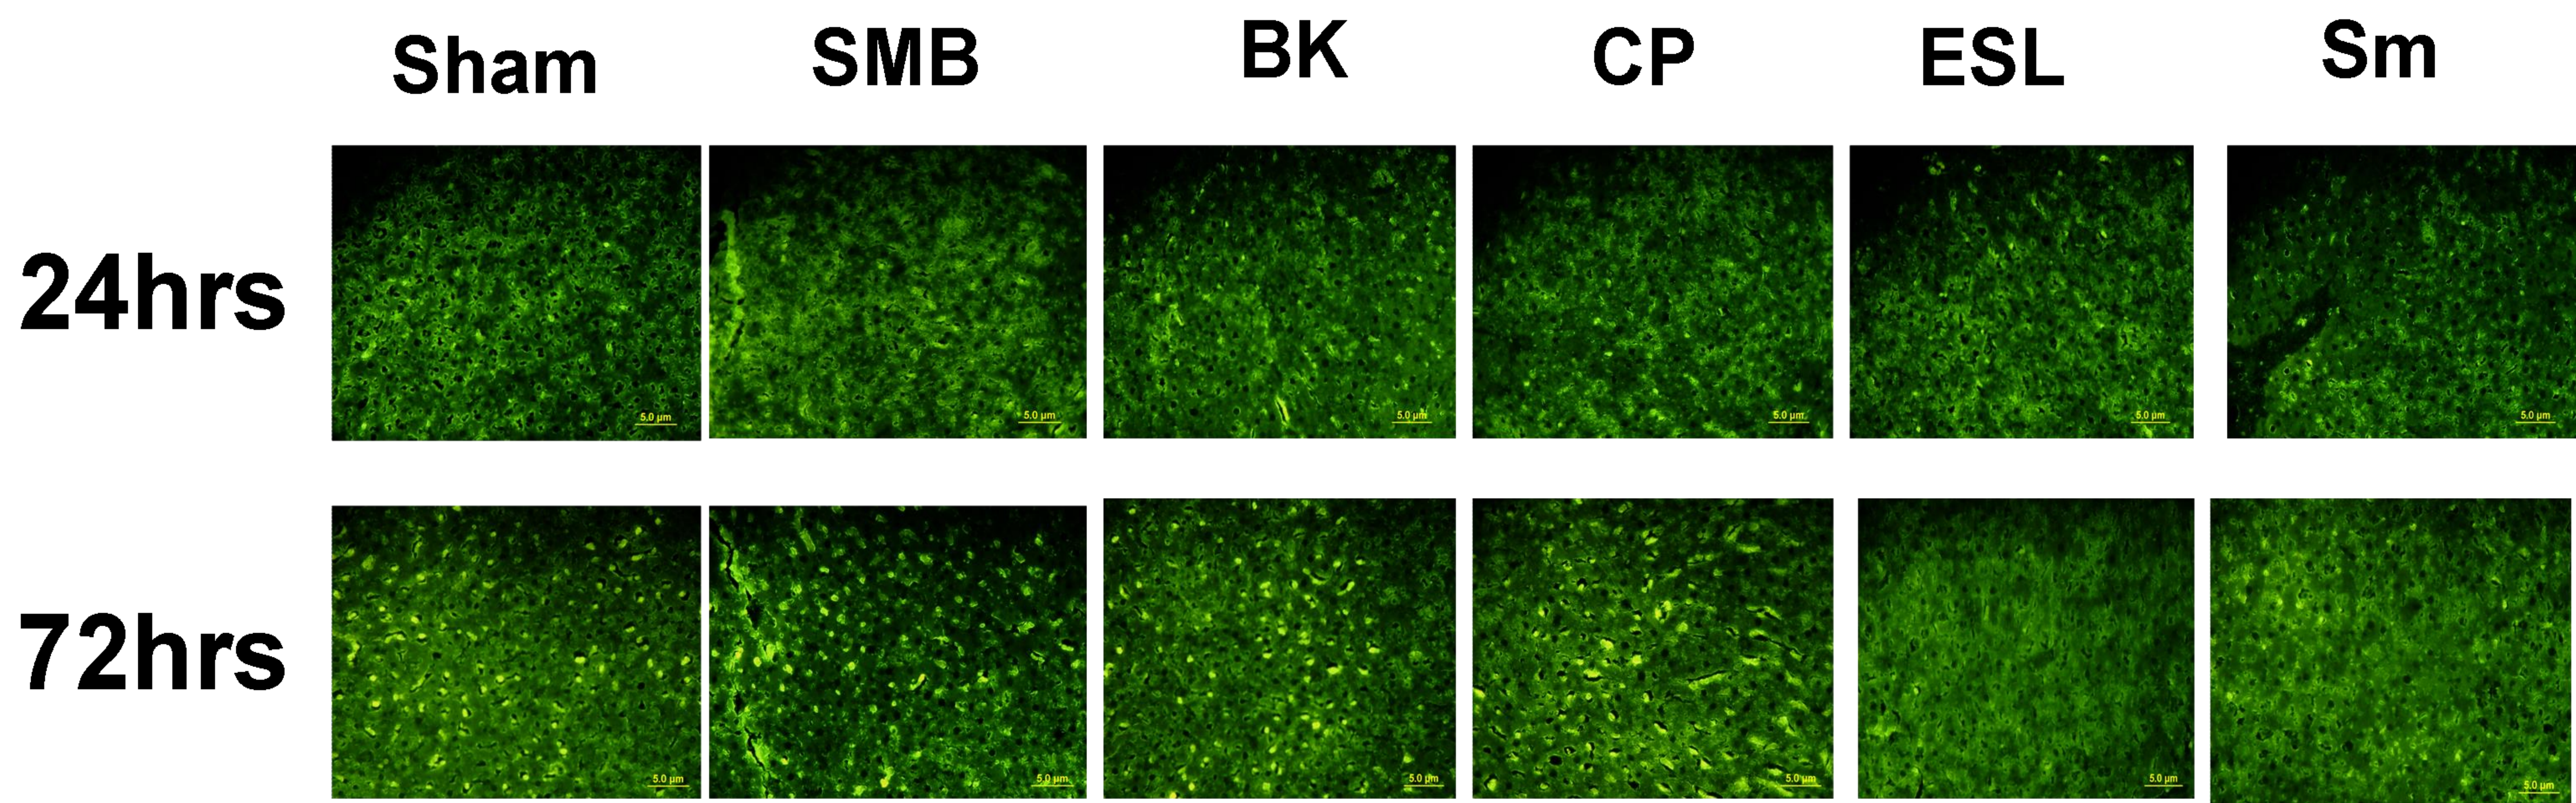

(c)

Supplement: f1 [file 4561243.f1.zip]

**24 PHx**

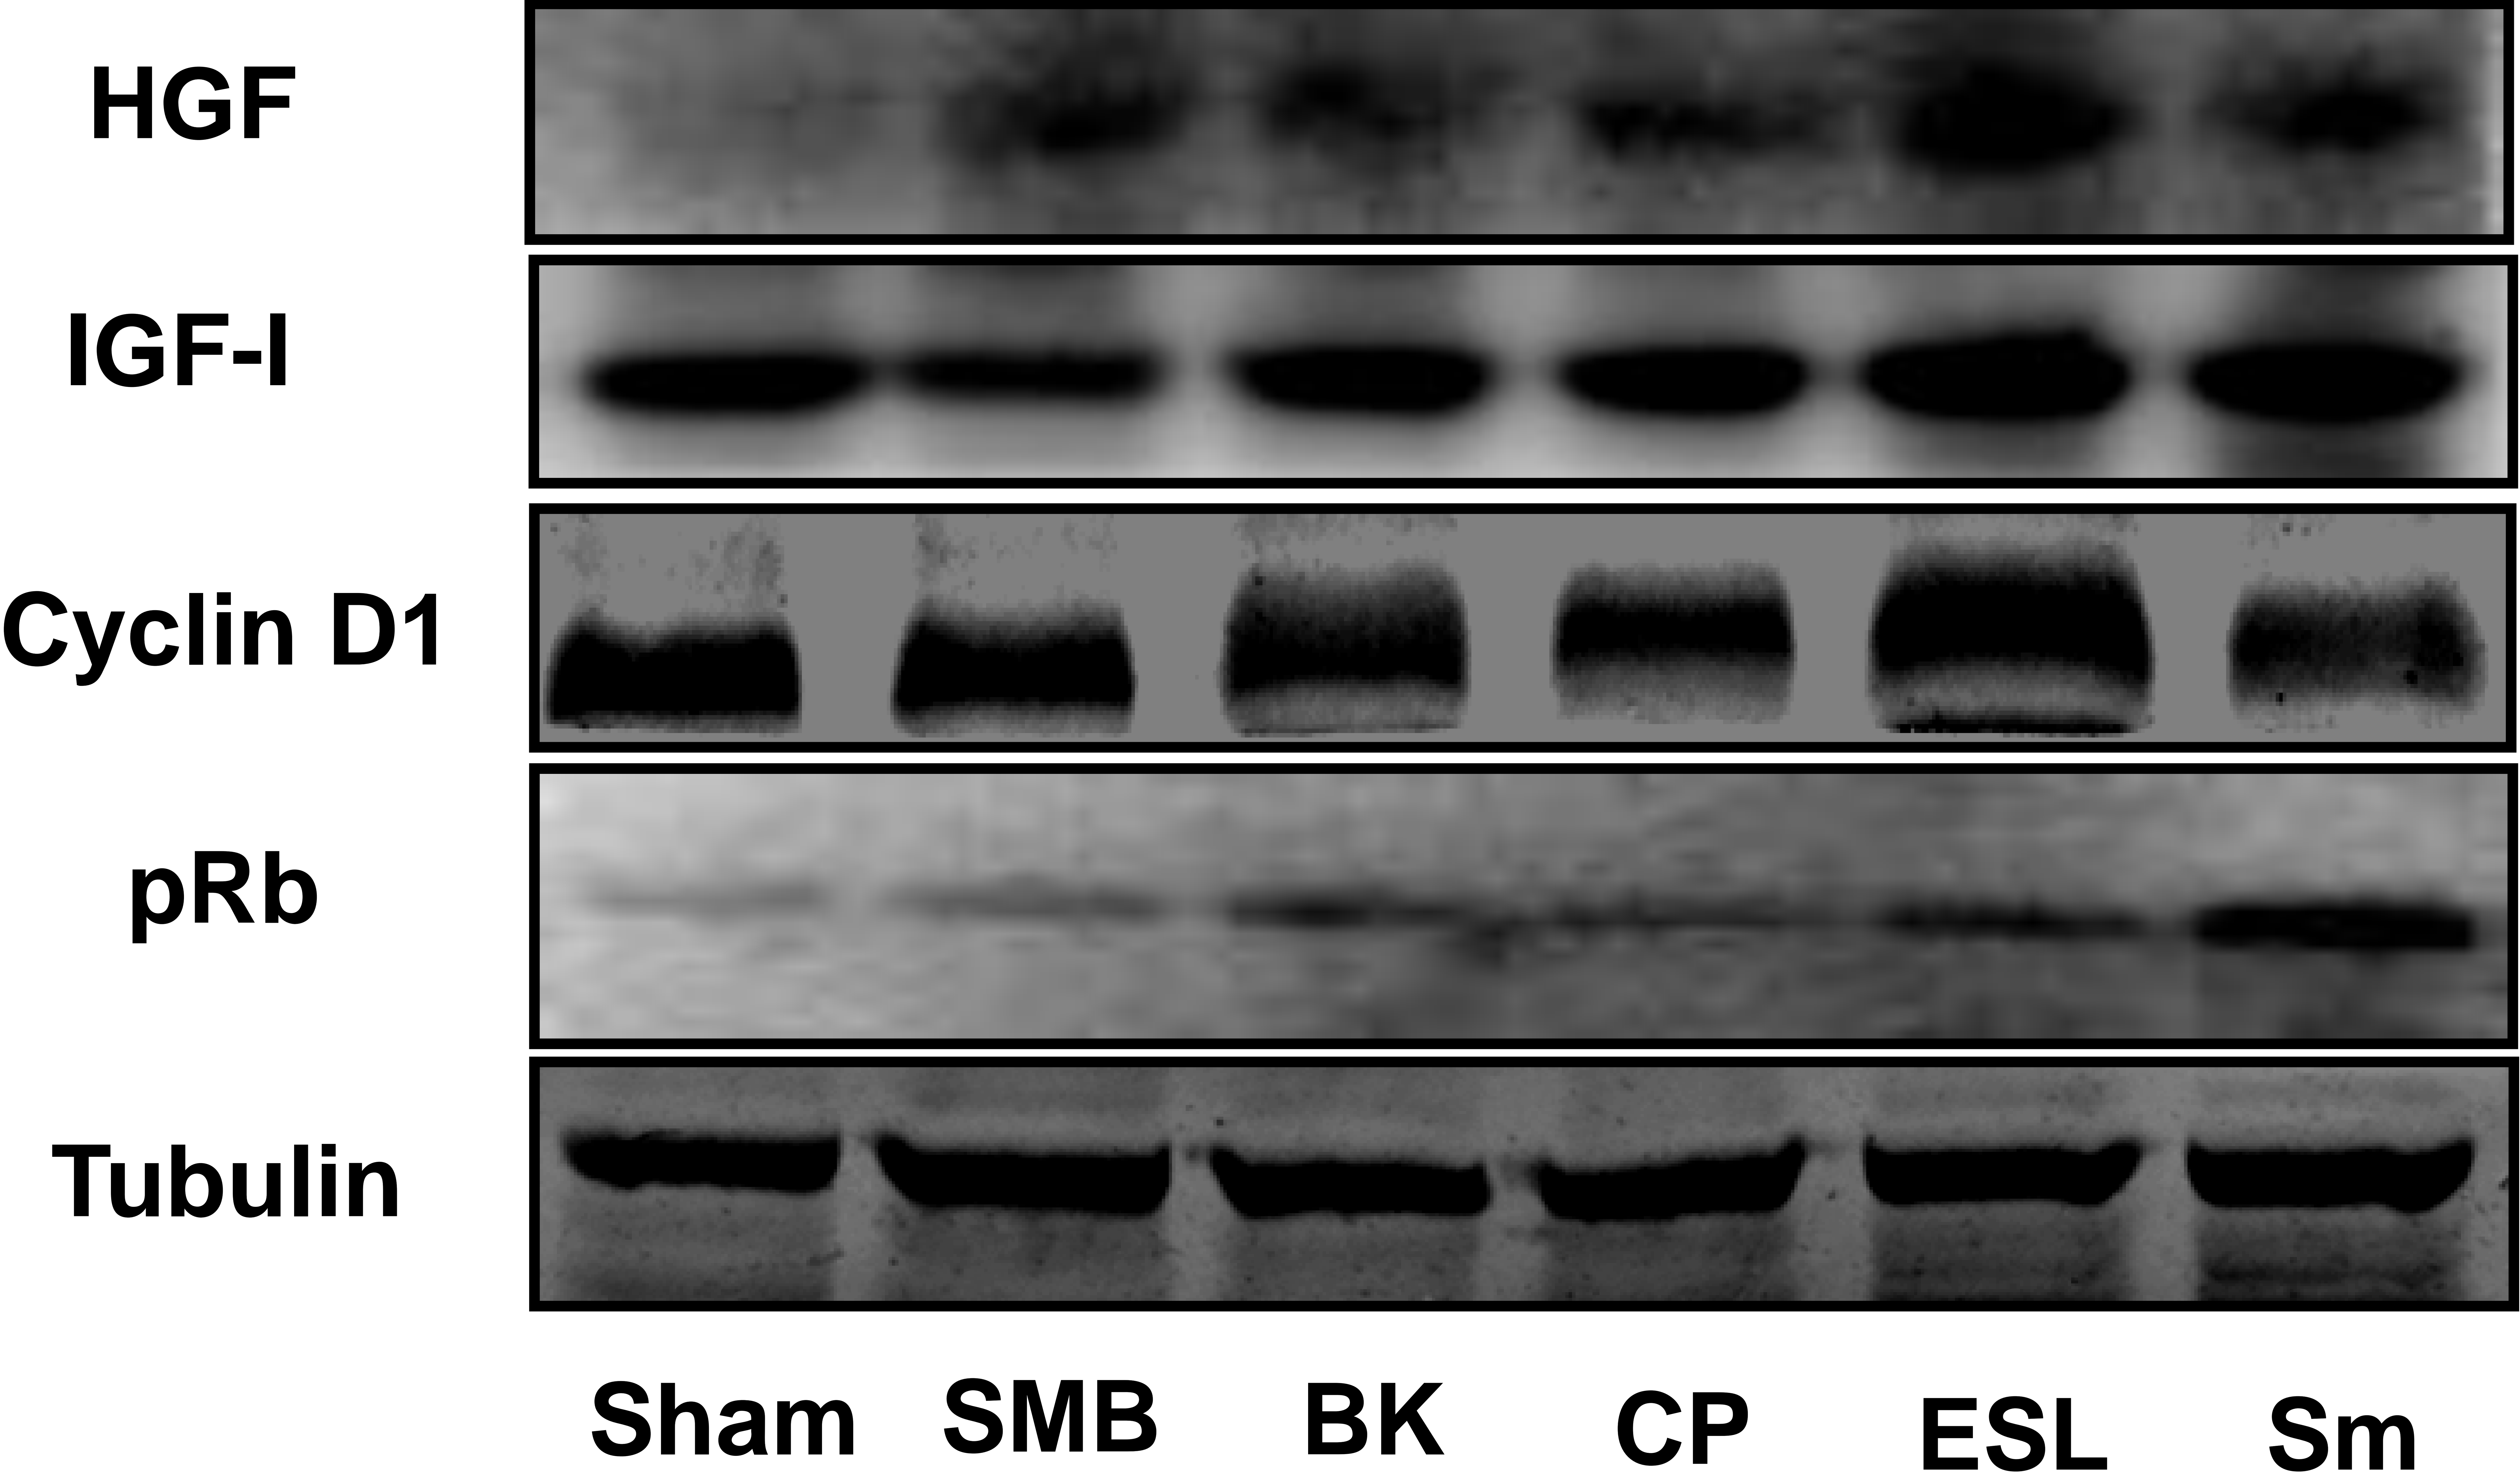

(a)

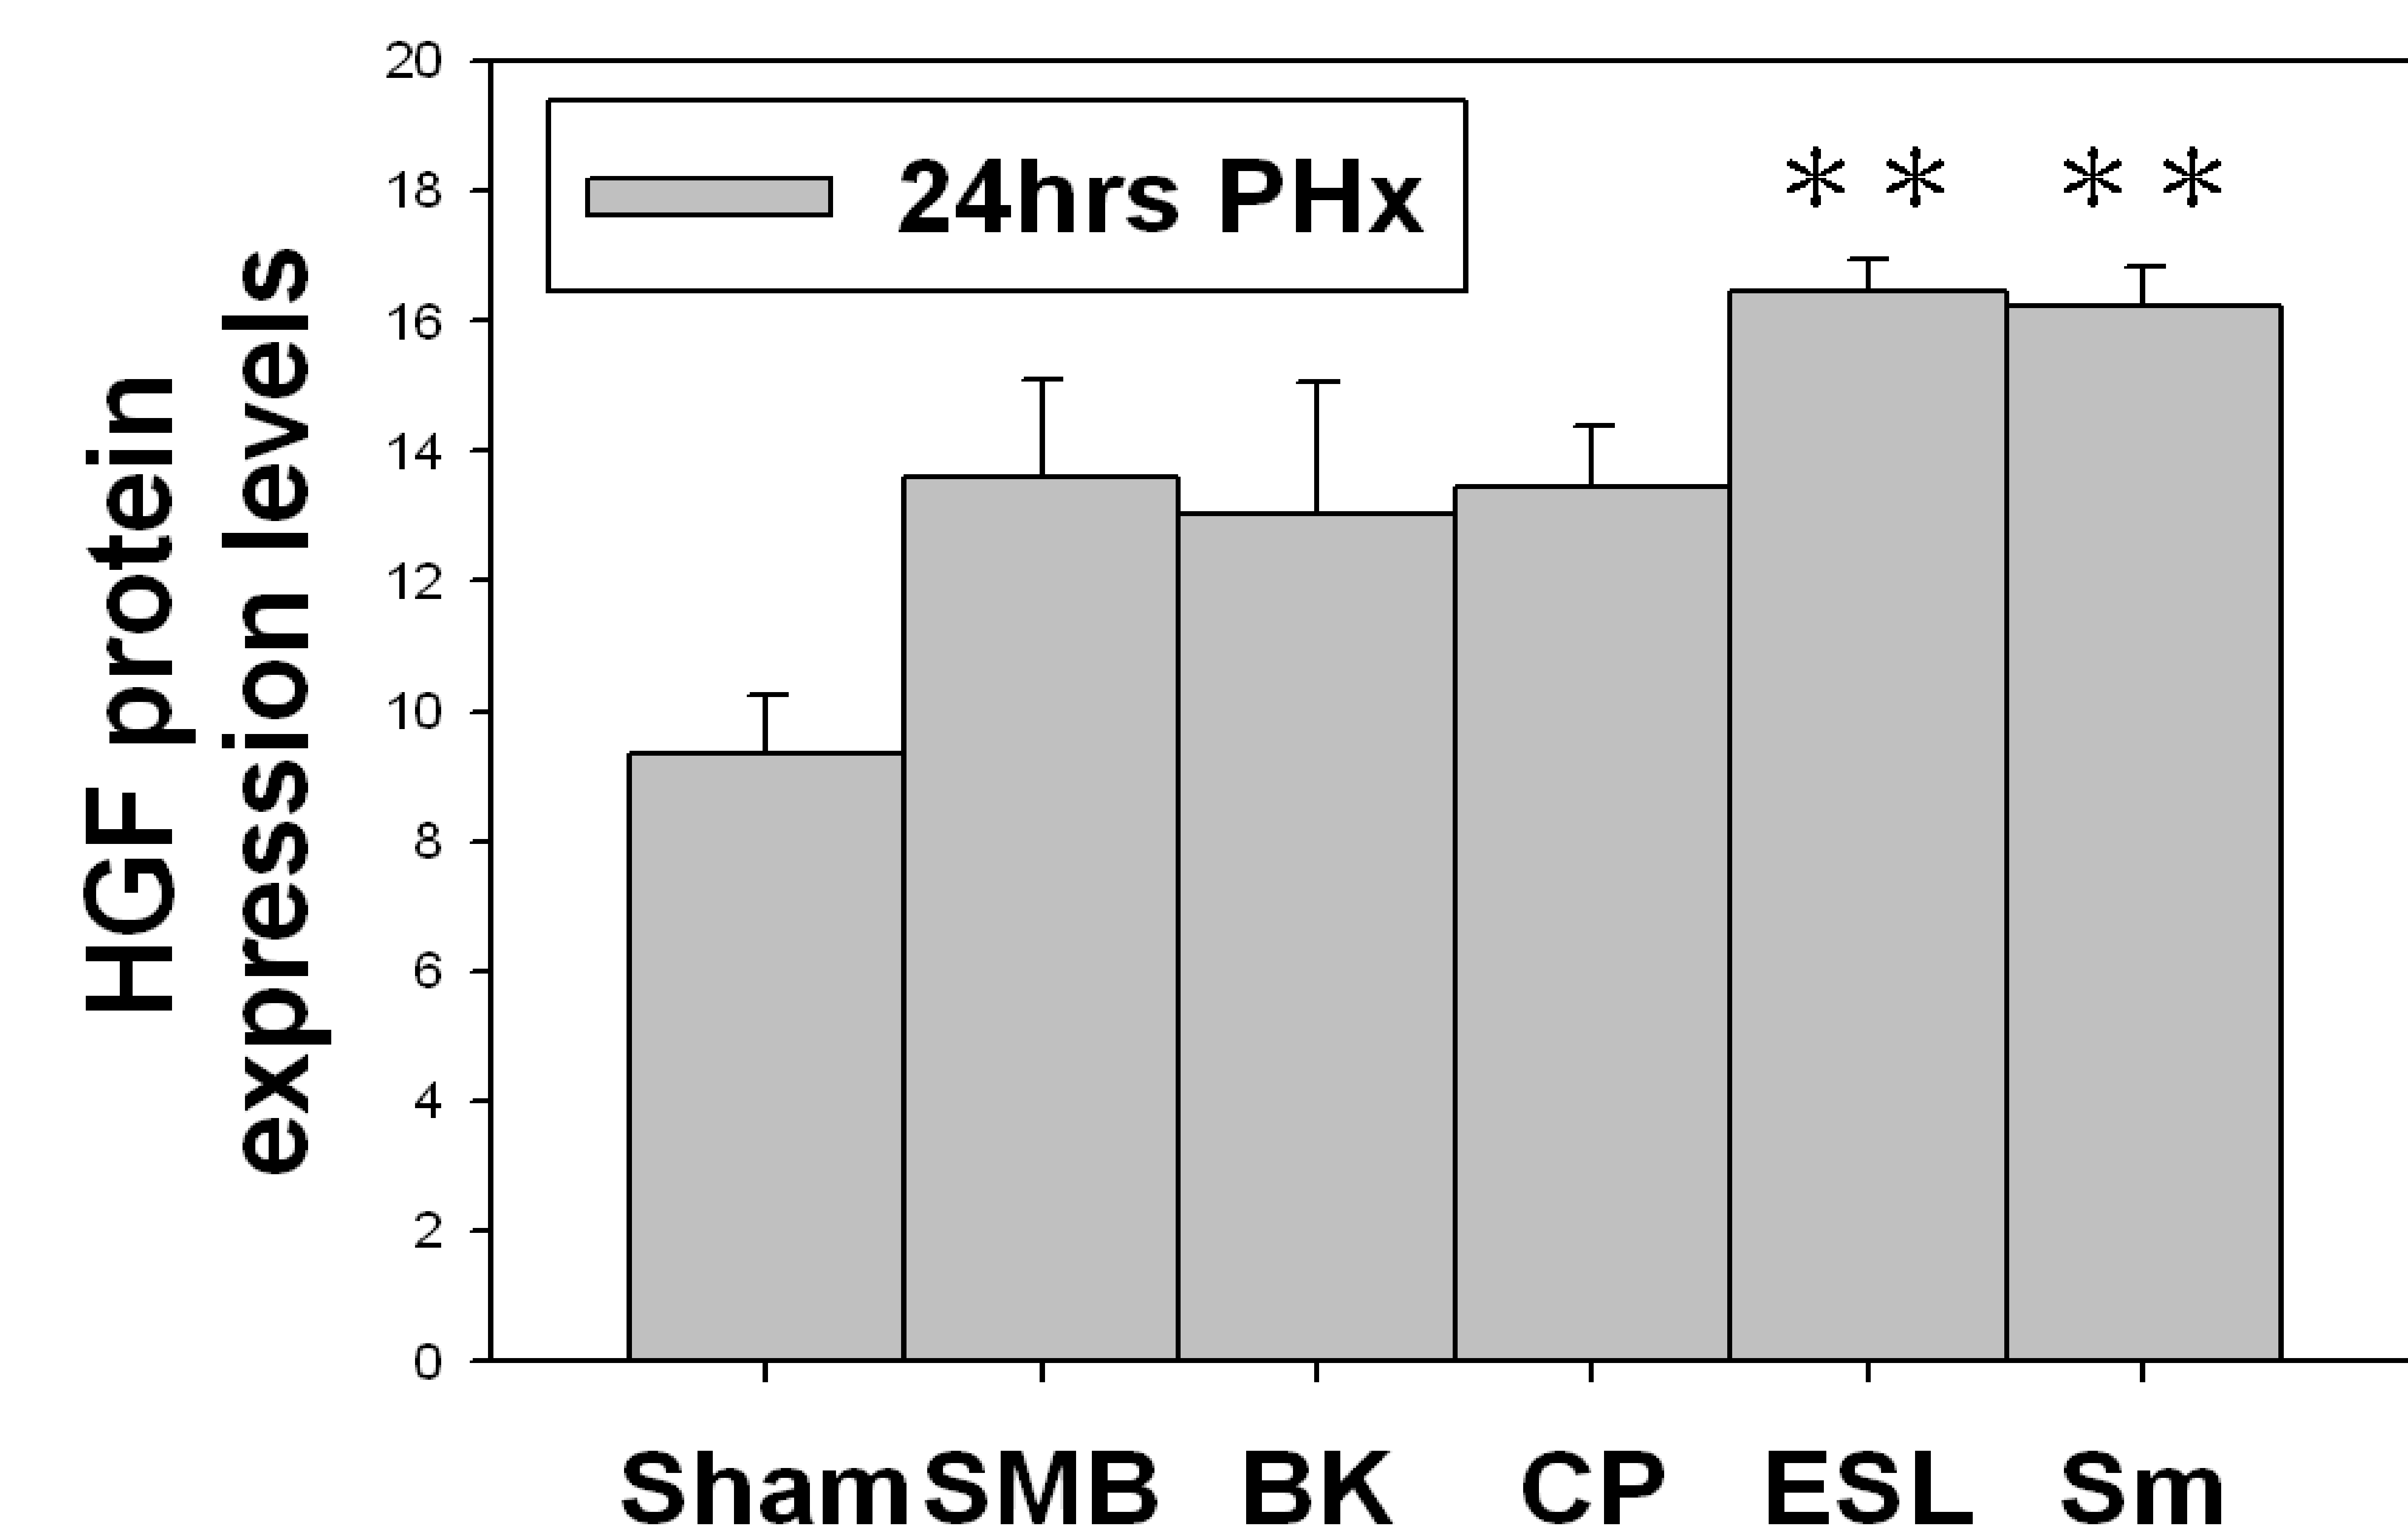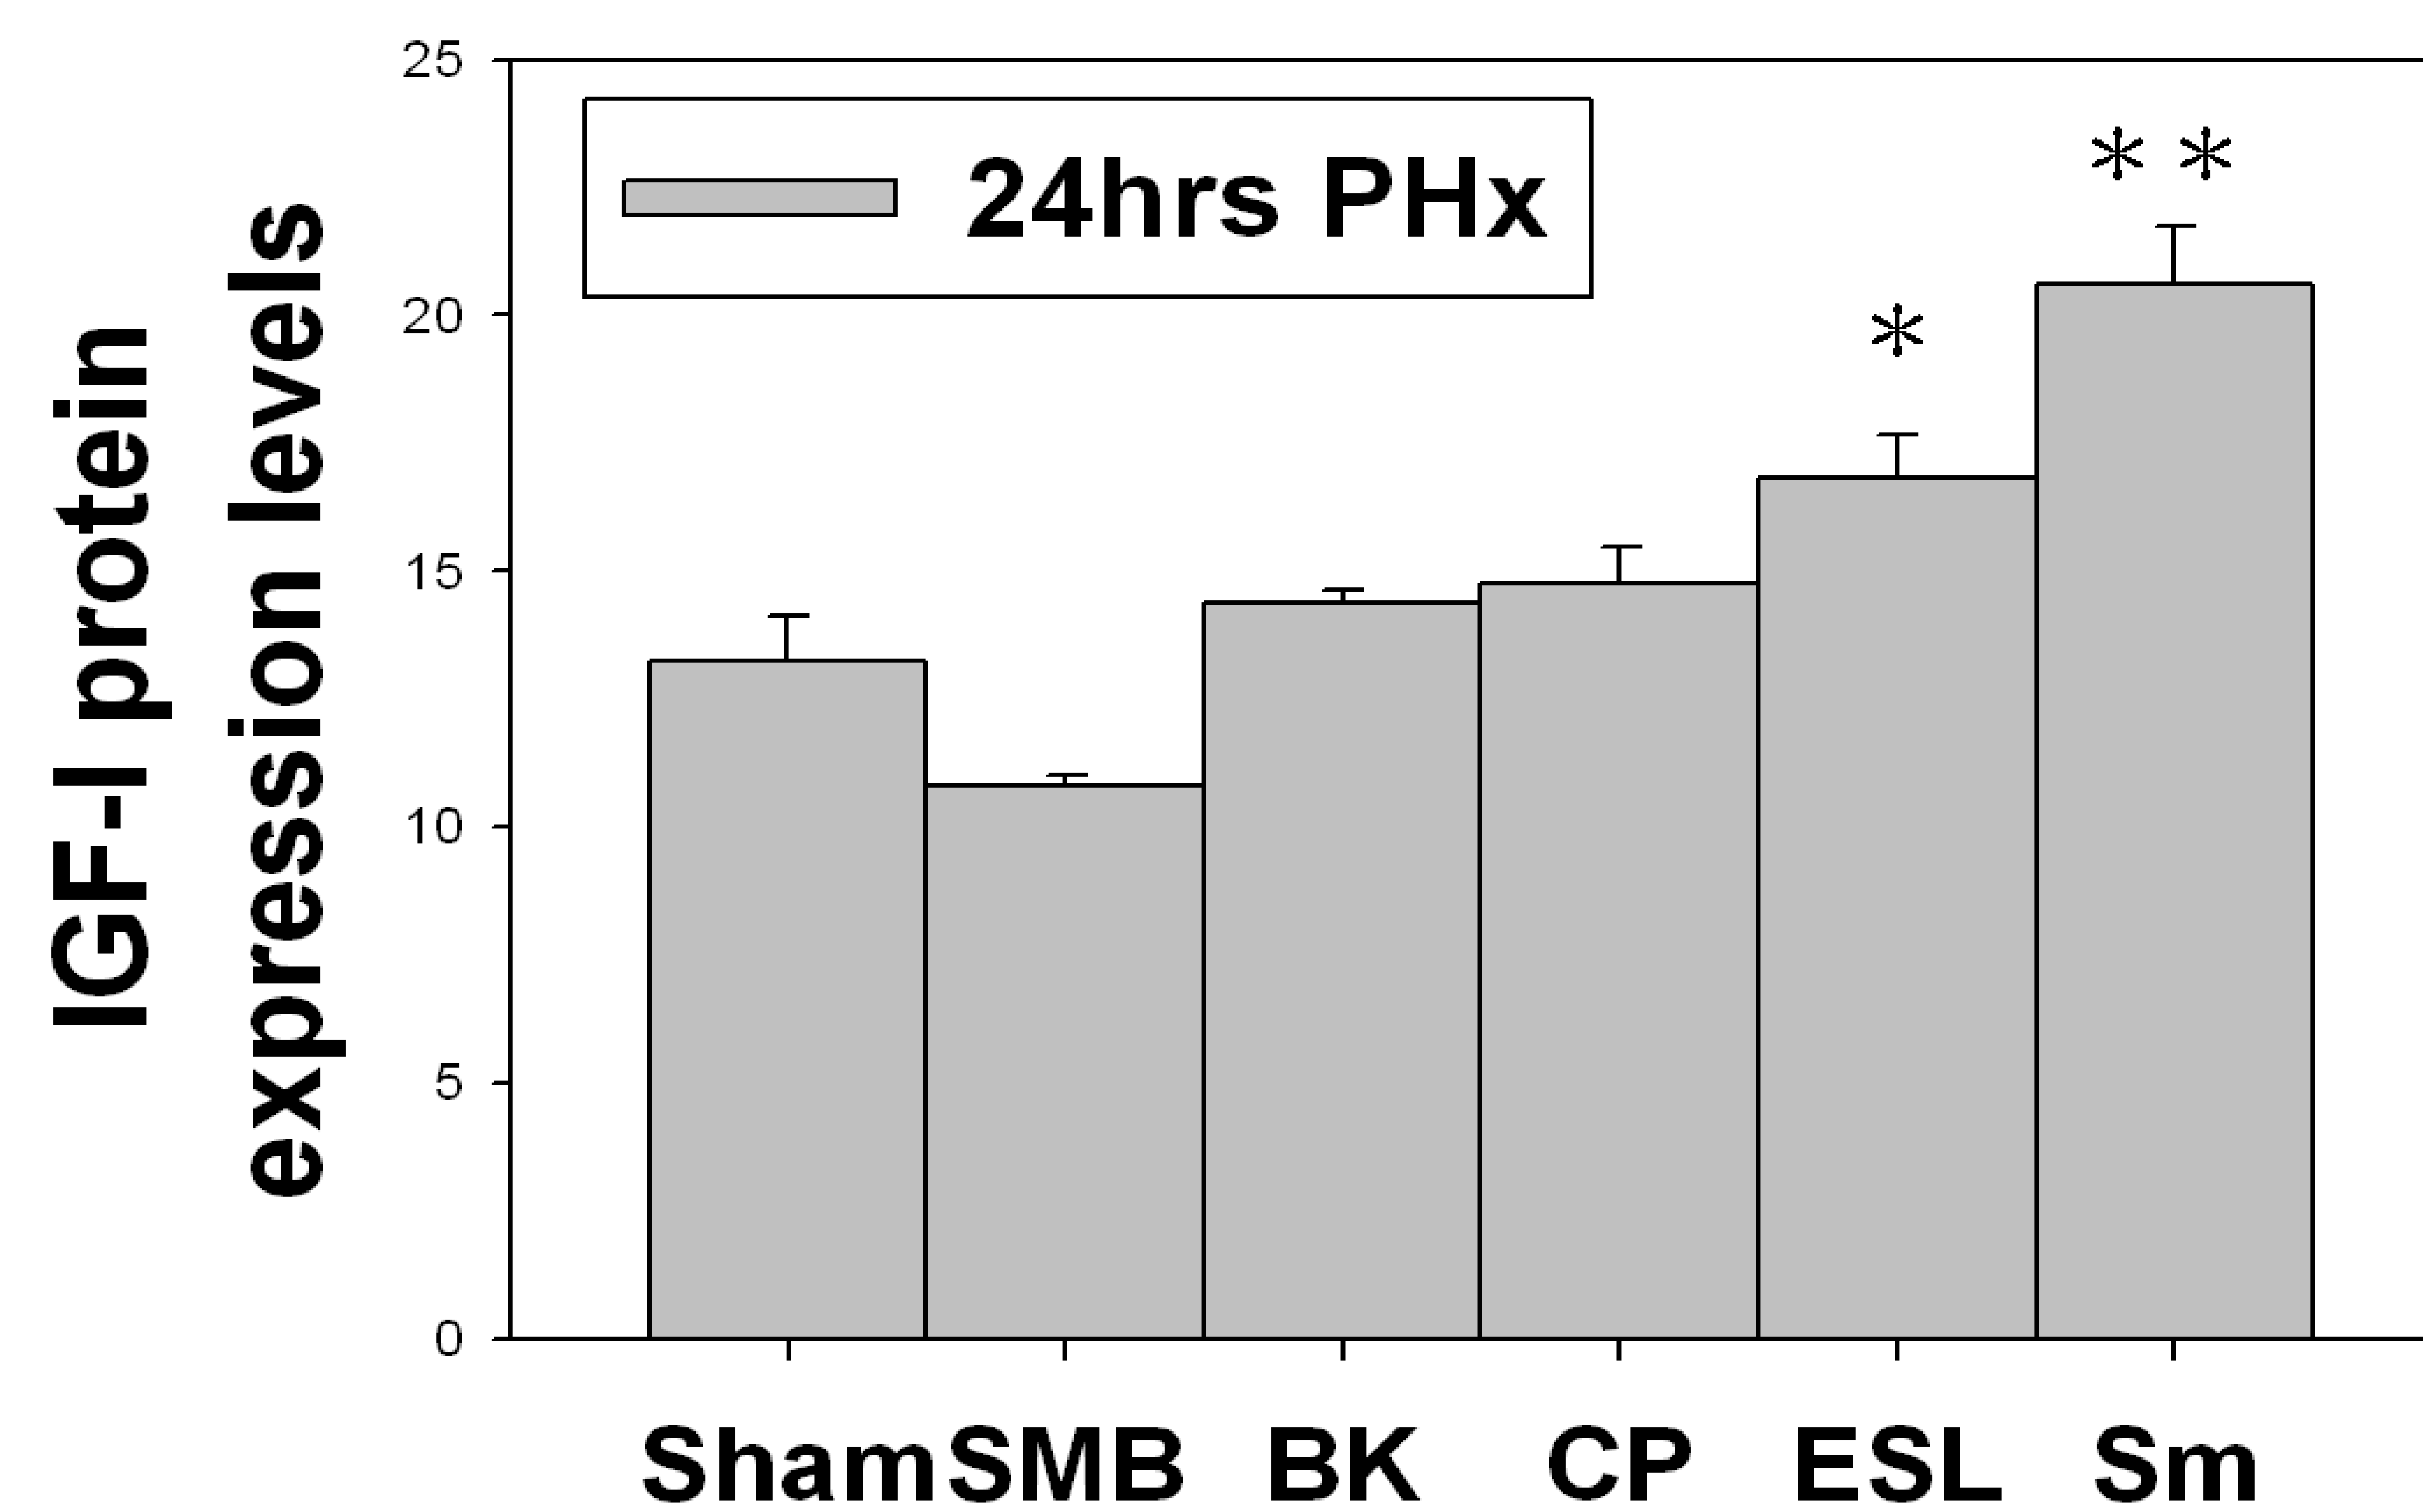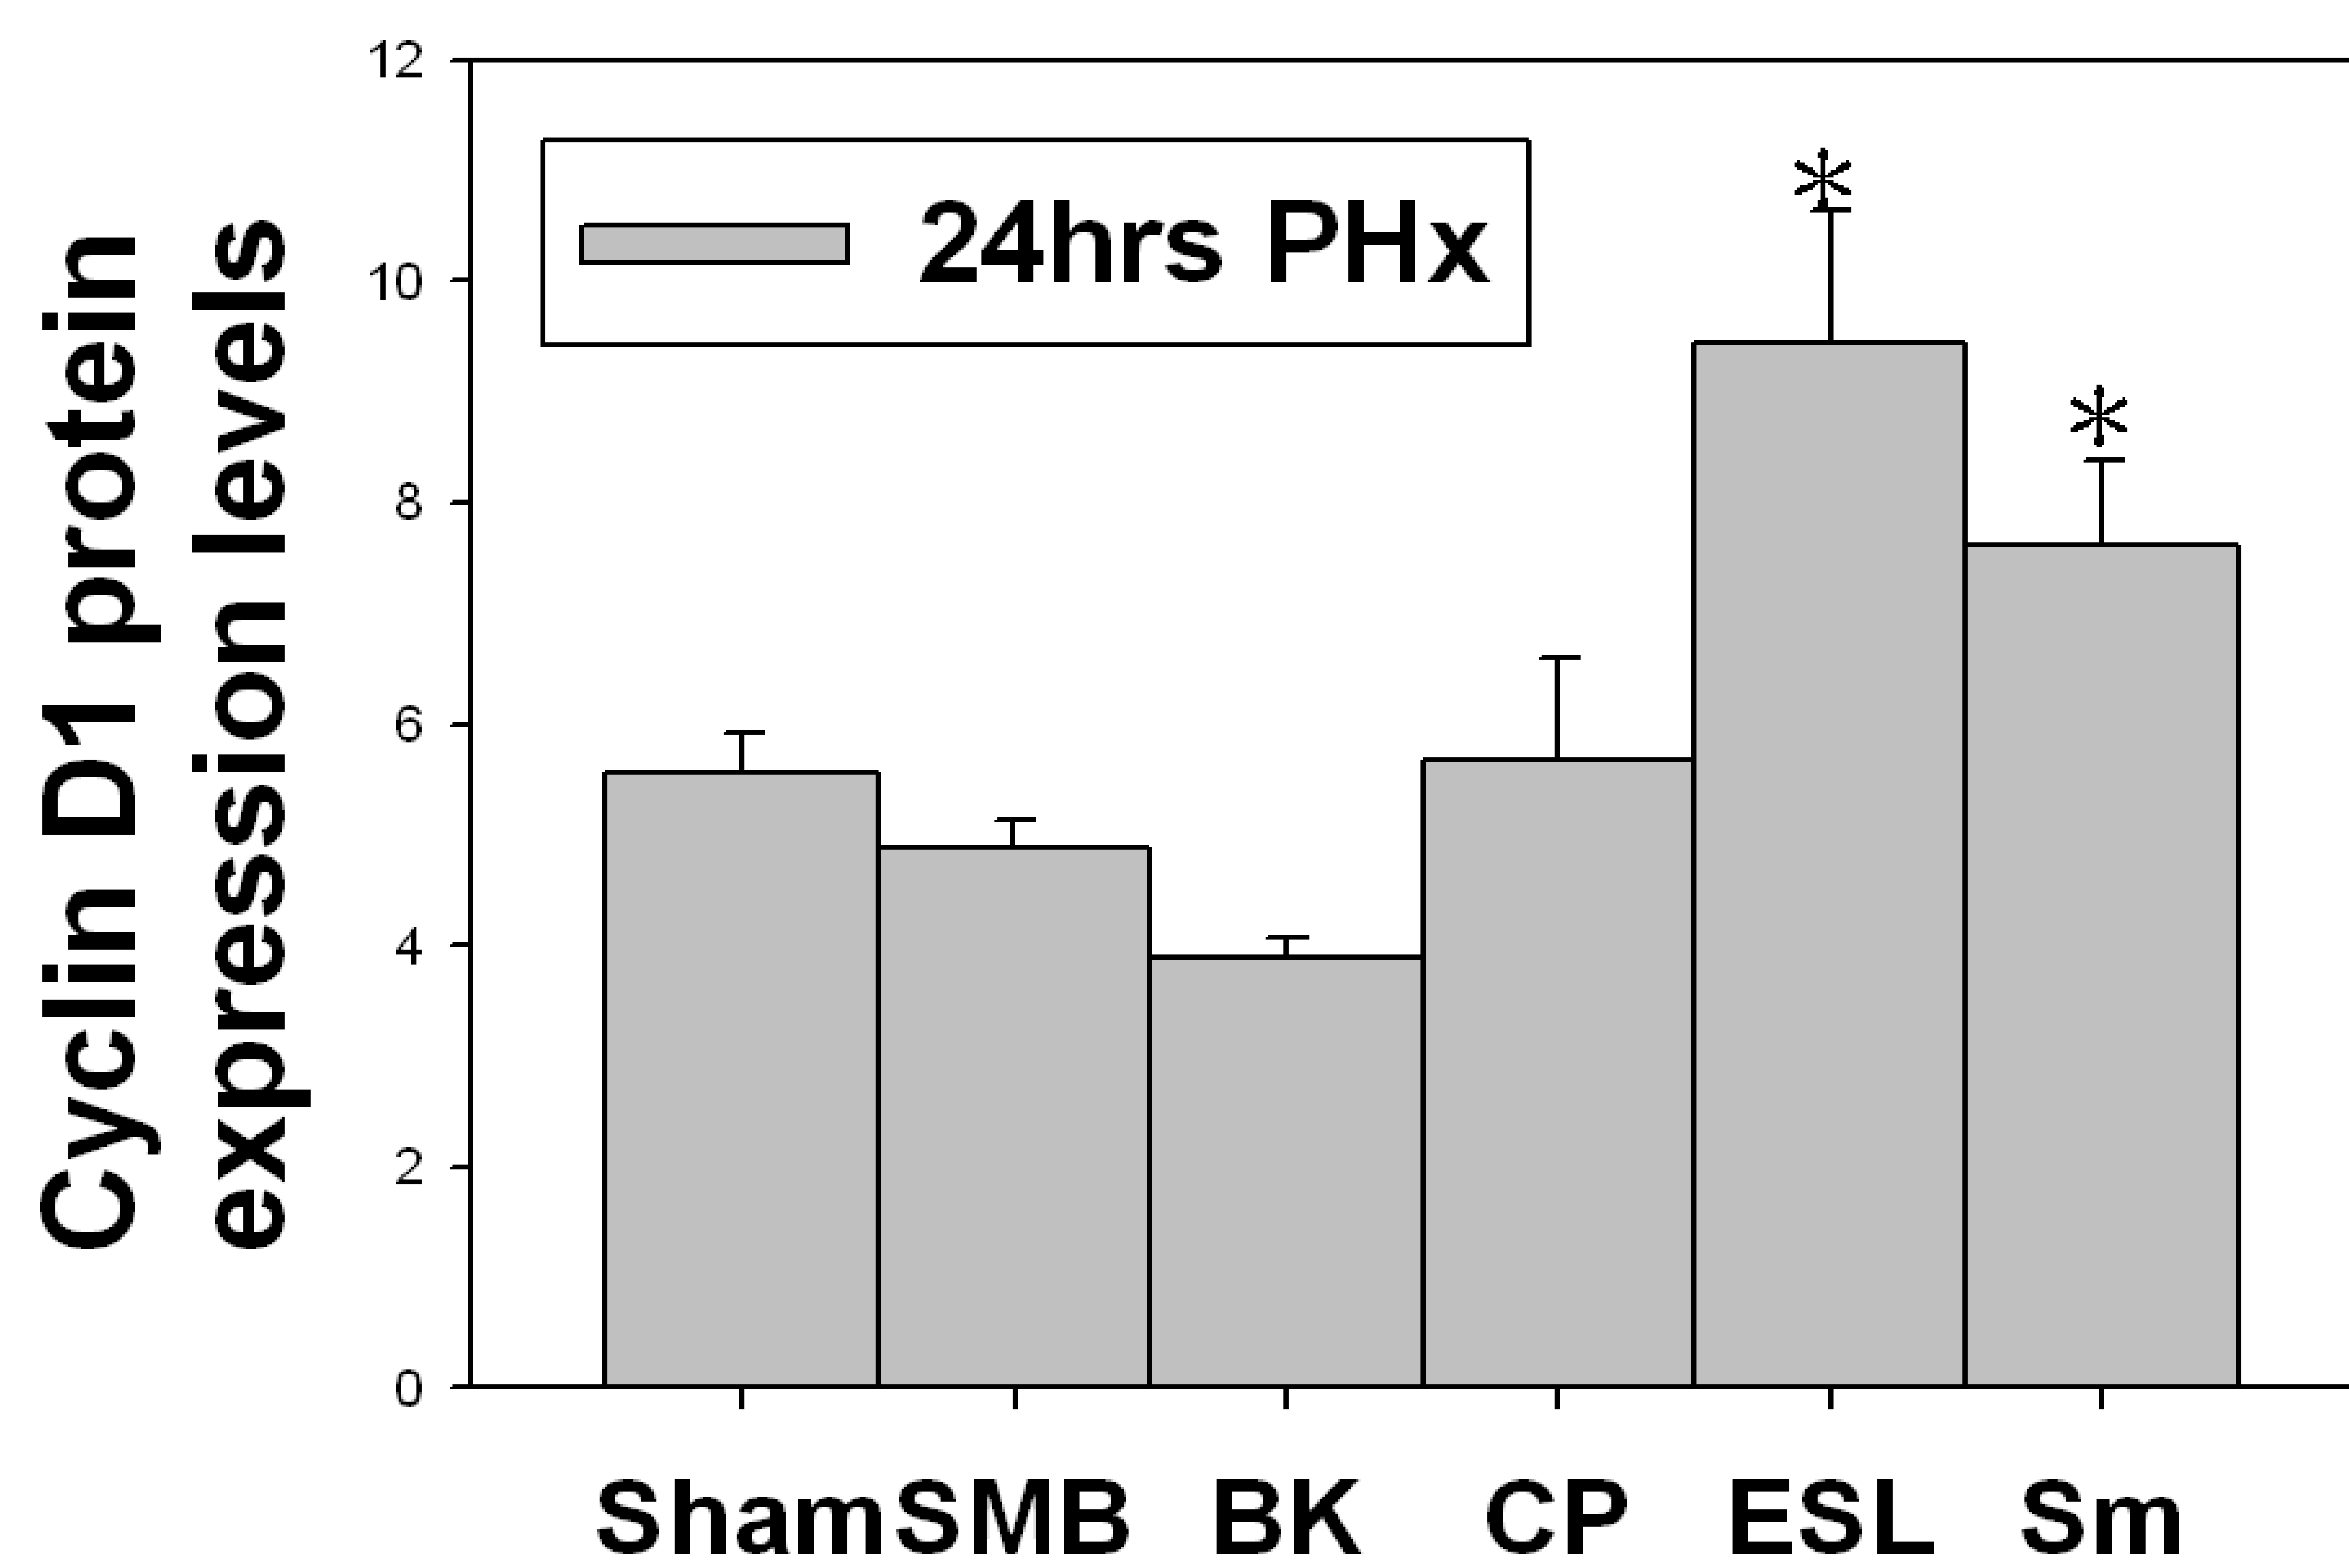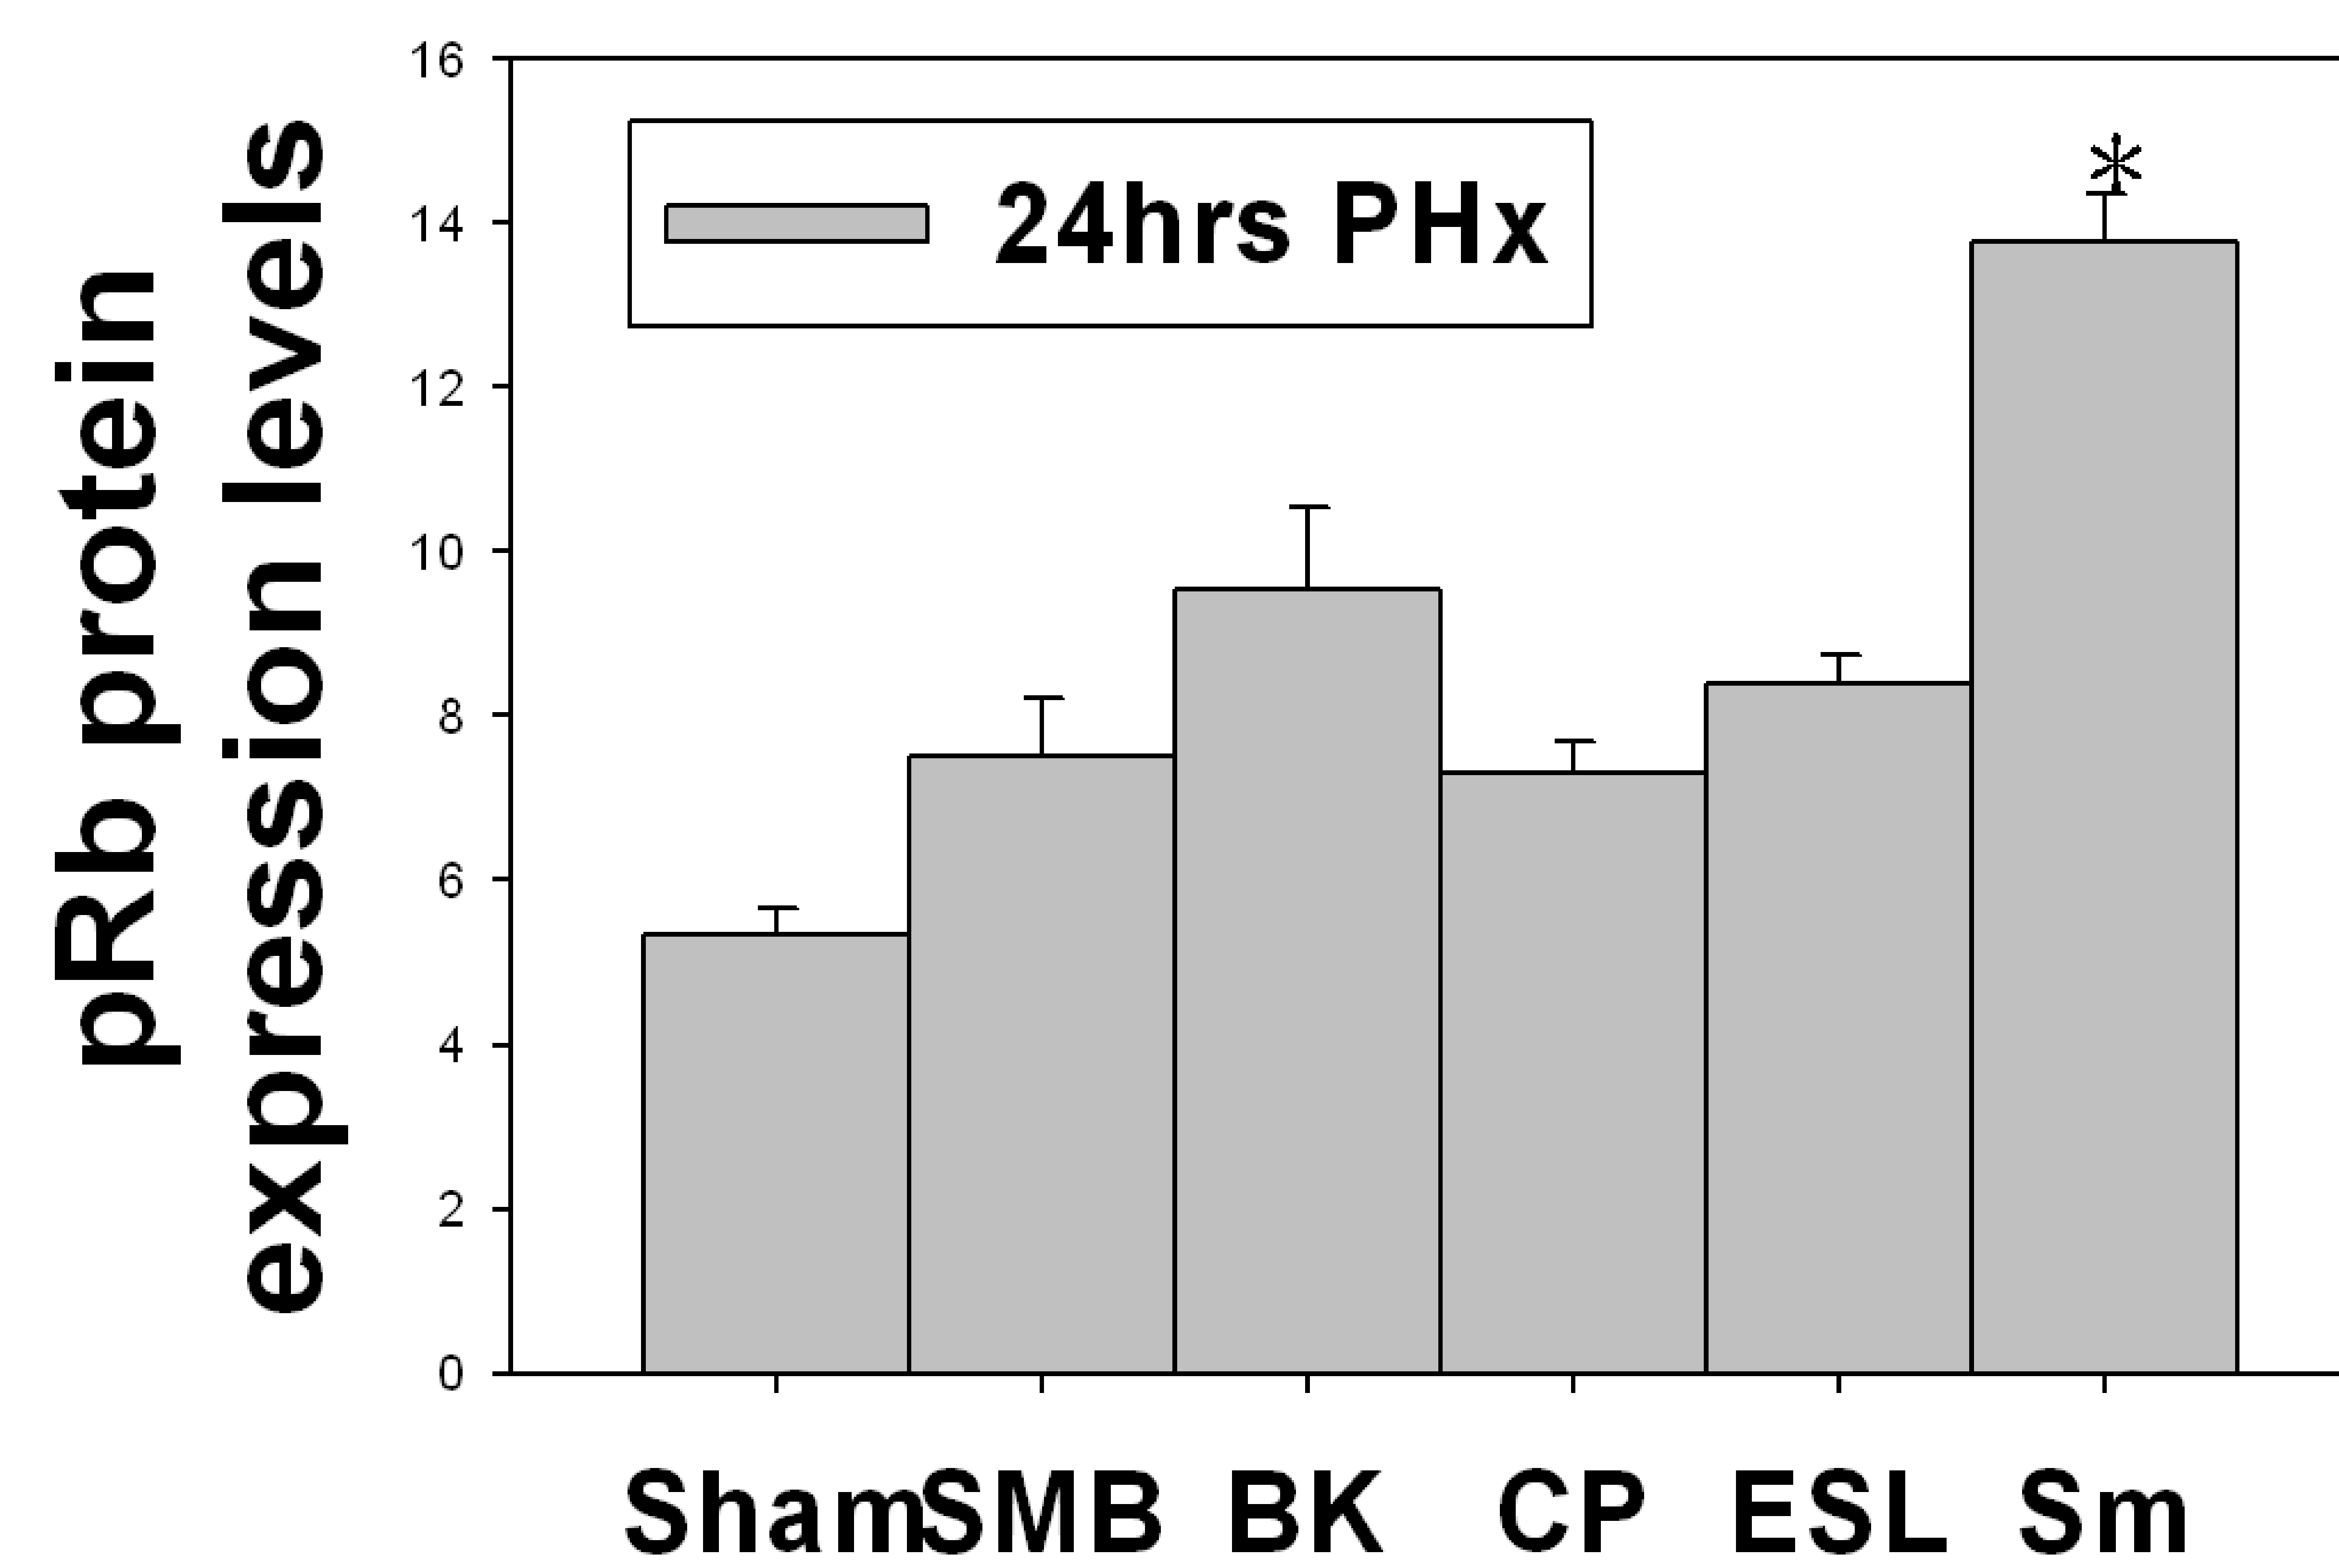

(b)



**72 PHx**

**HGF**

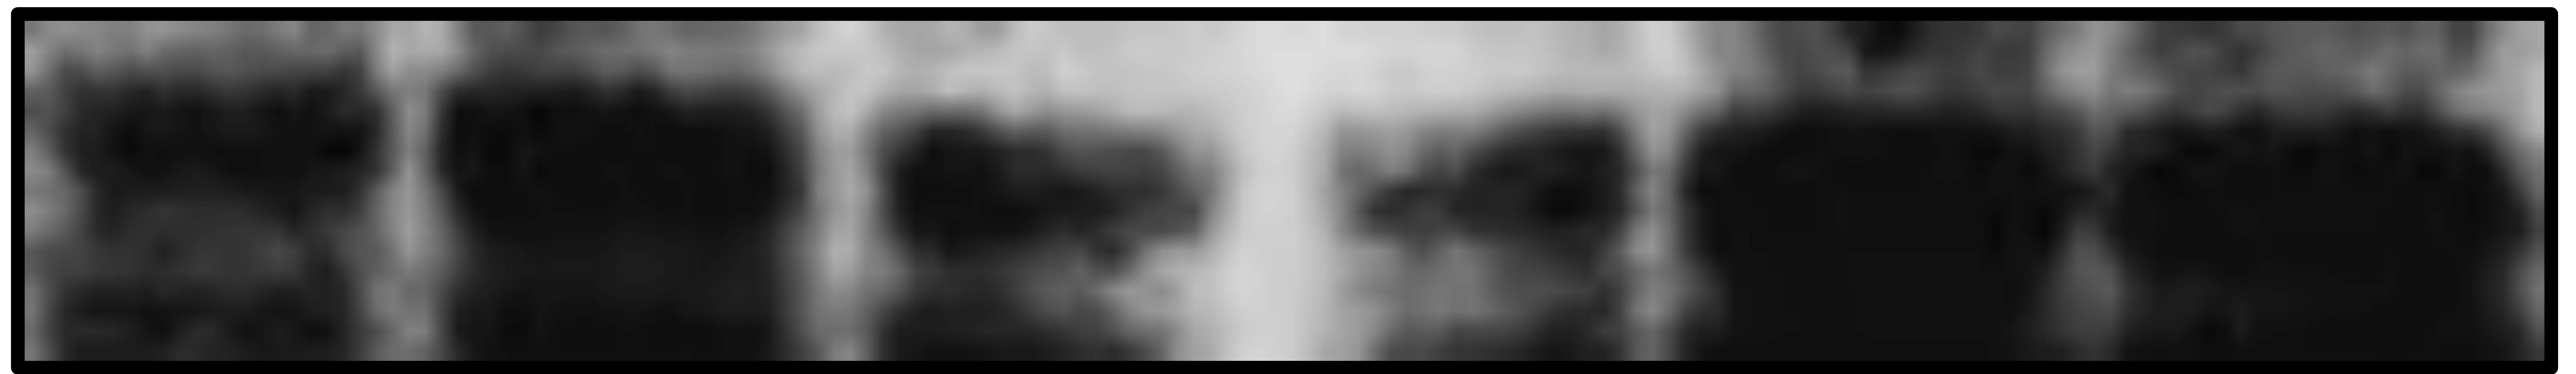

**IGF-I**

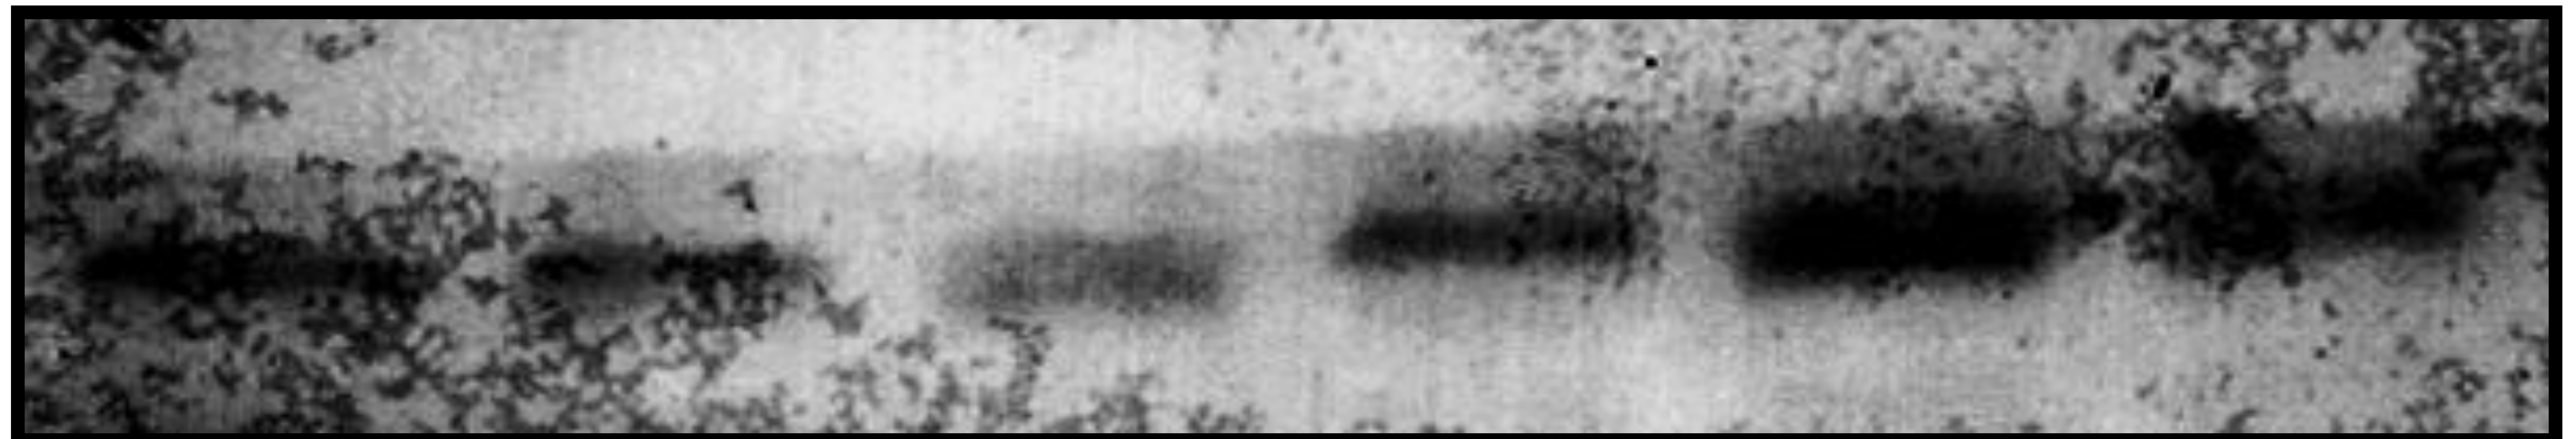

**Cyclin D1**

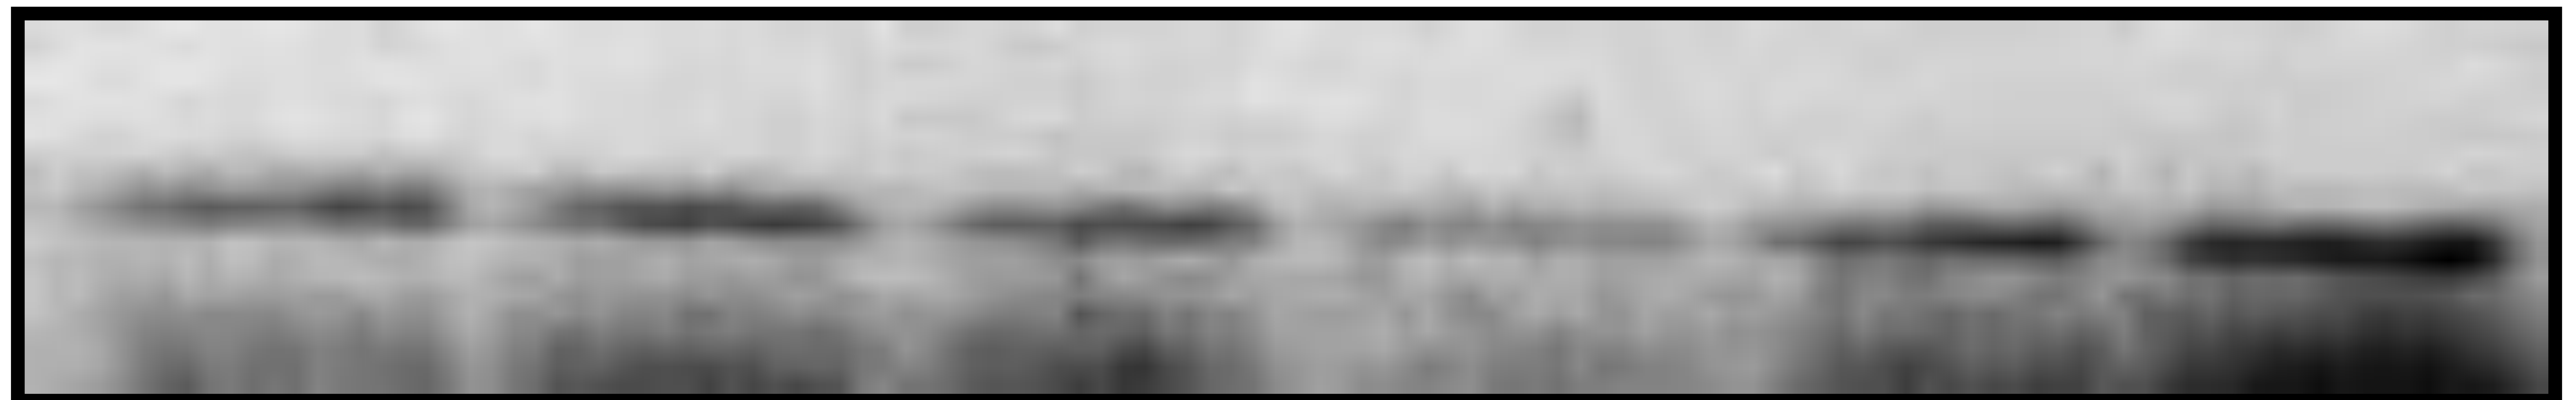

**pRb**

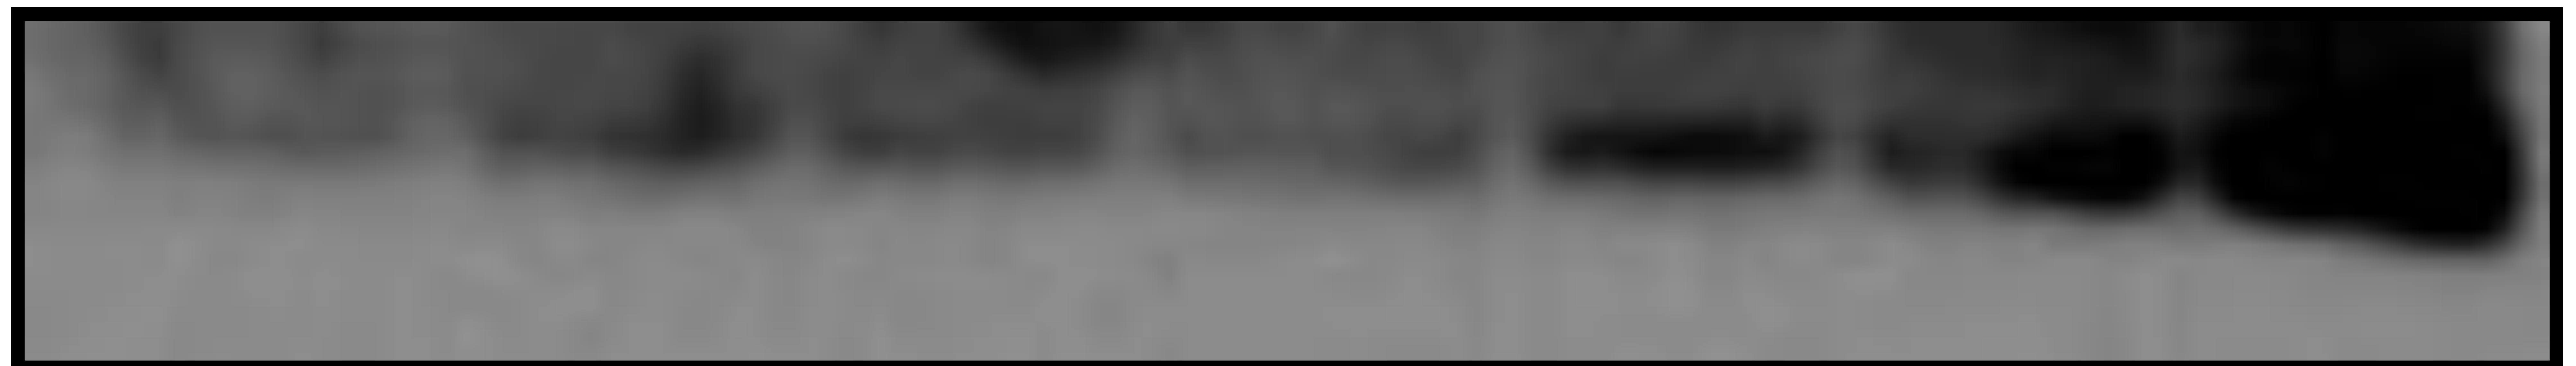

**Tubulin**

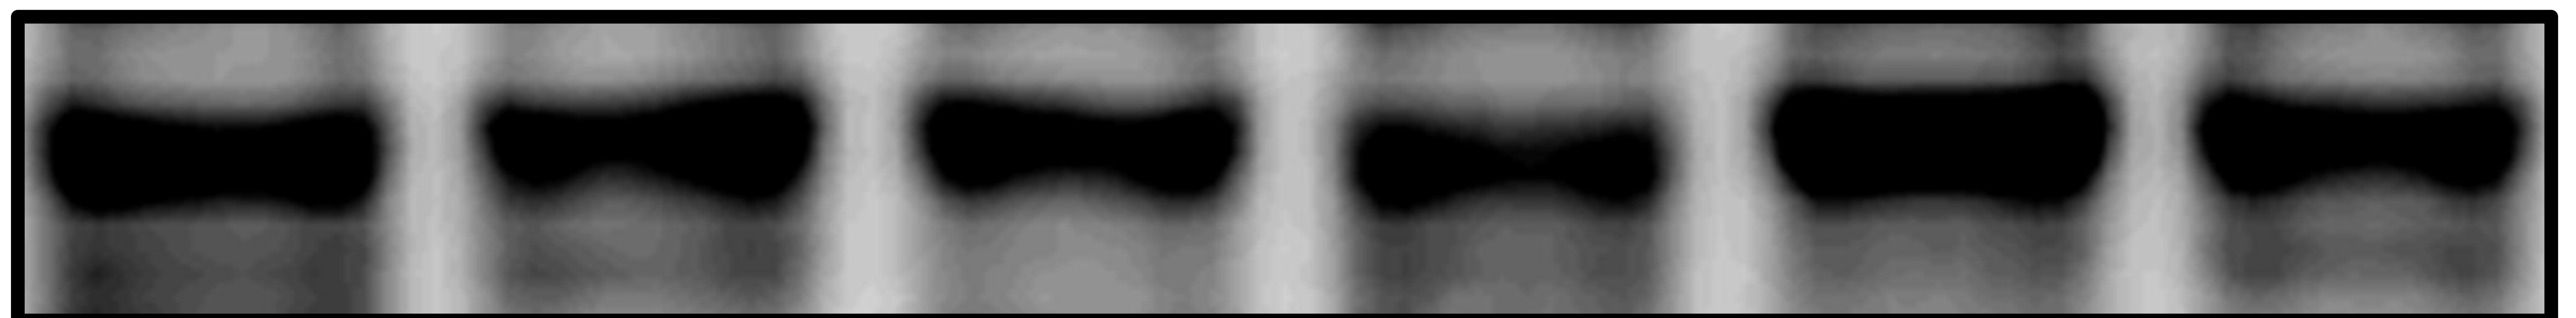

**Sham**

**SMB**

**BK**

**CP**

**ESL**

**Sm**

**(c)**

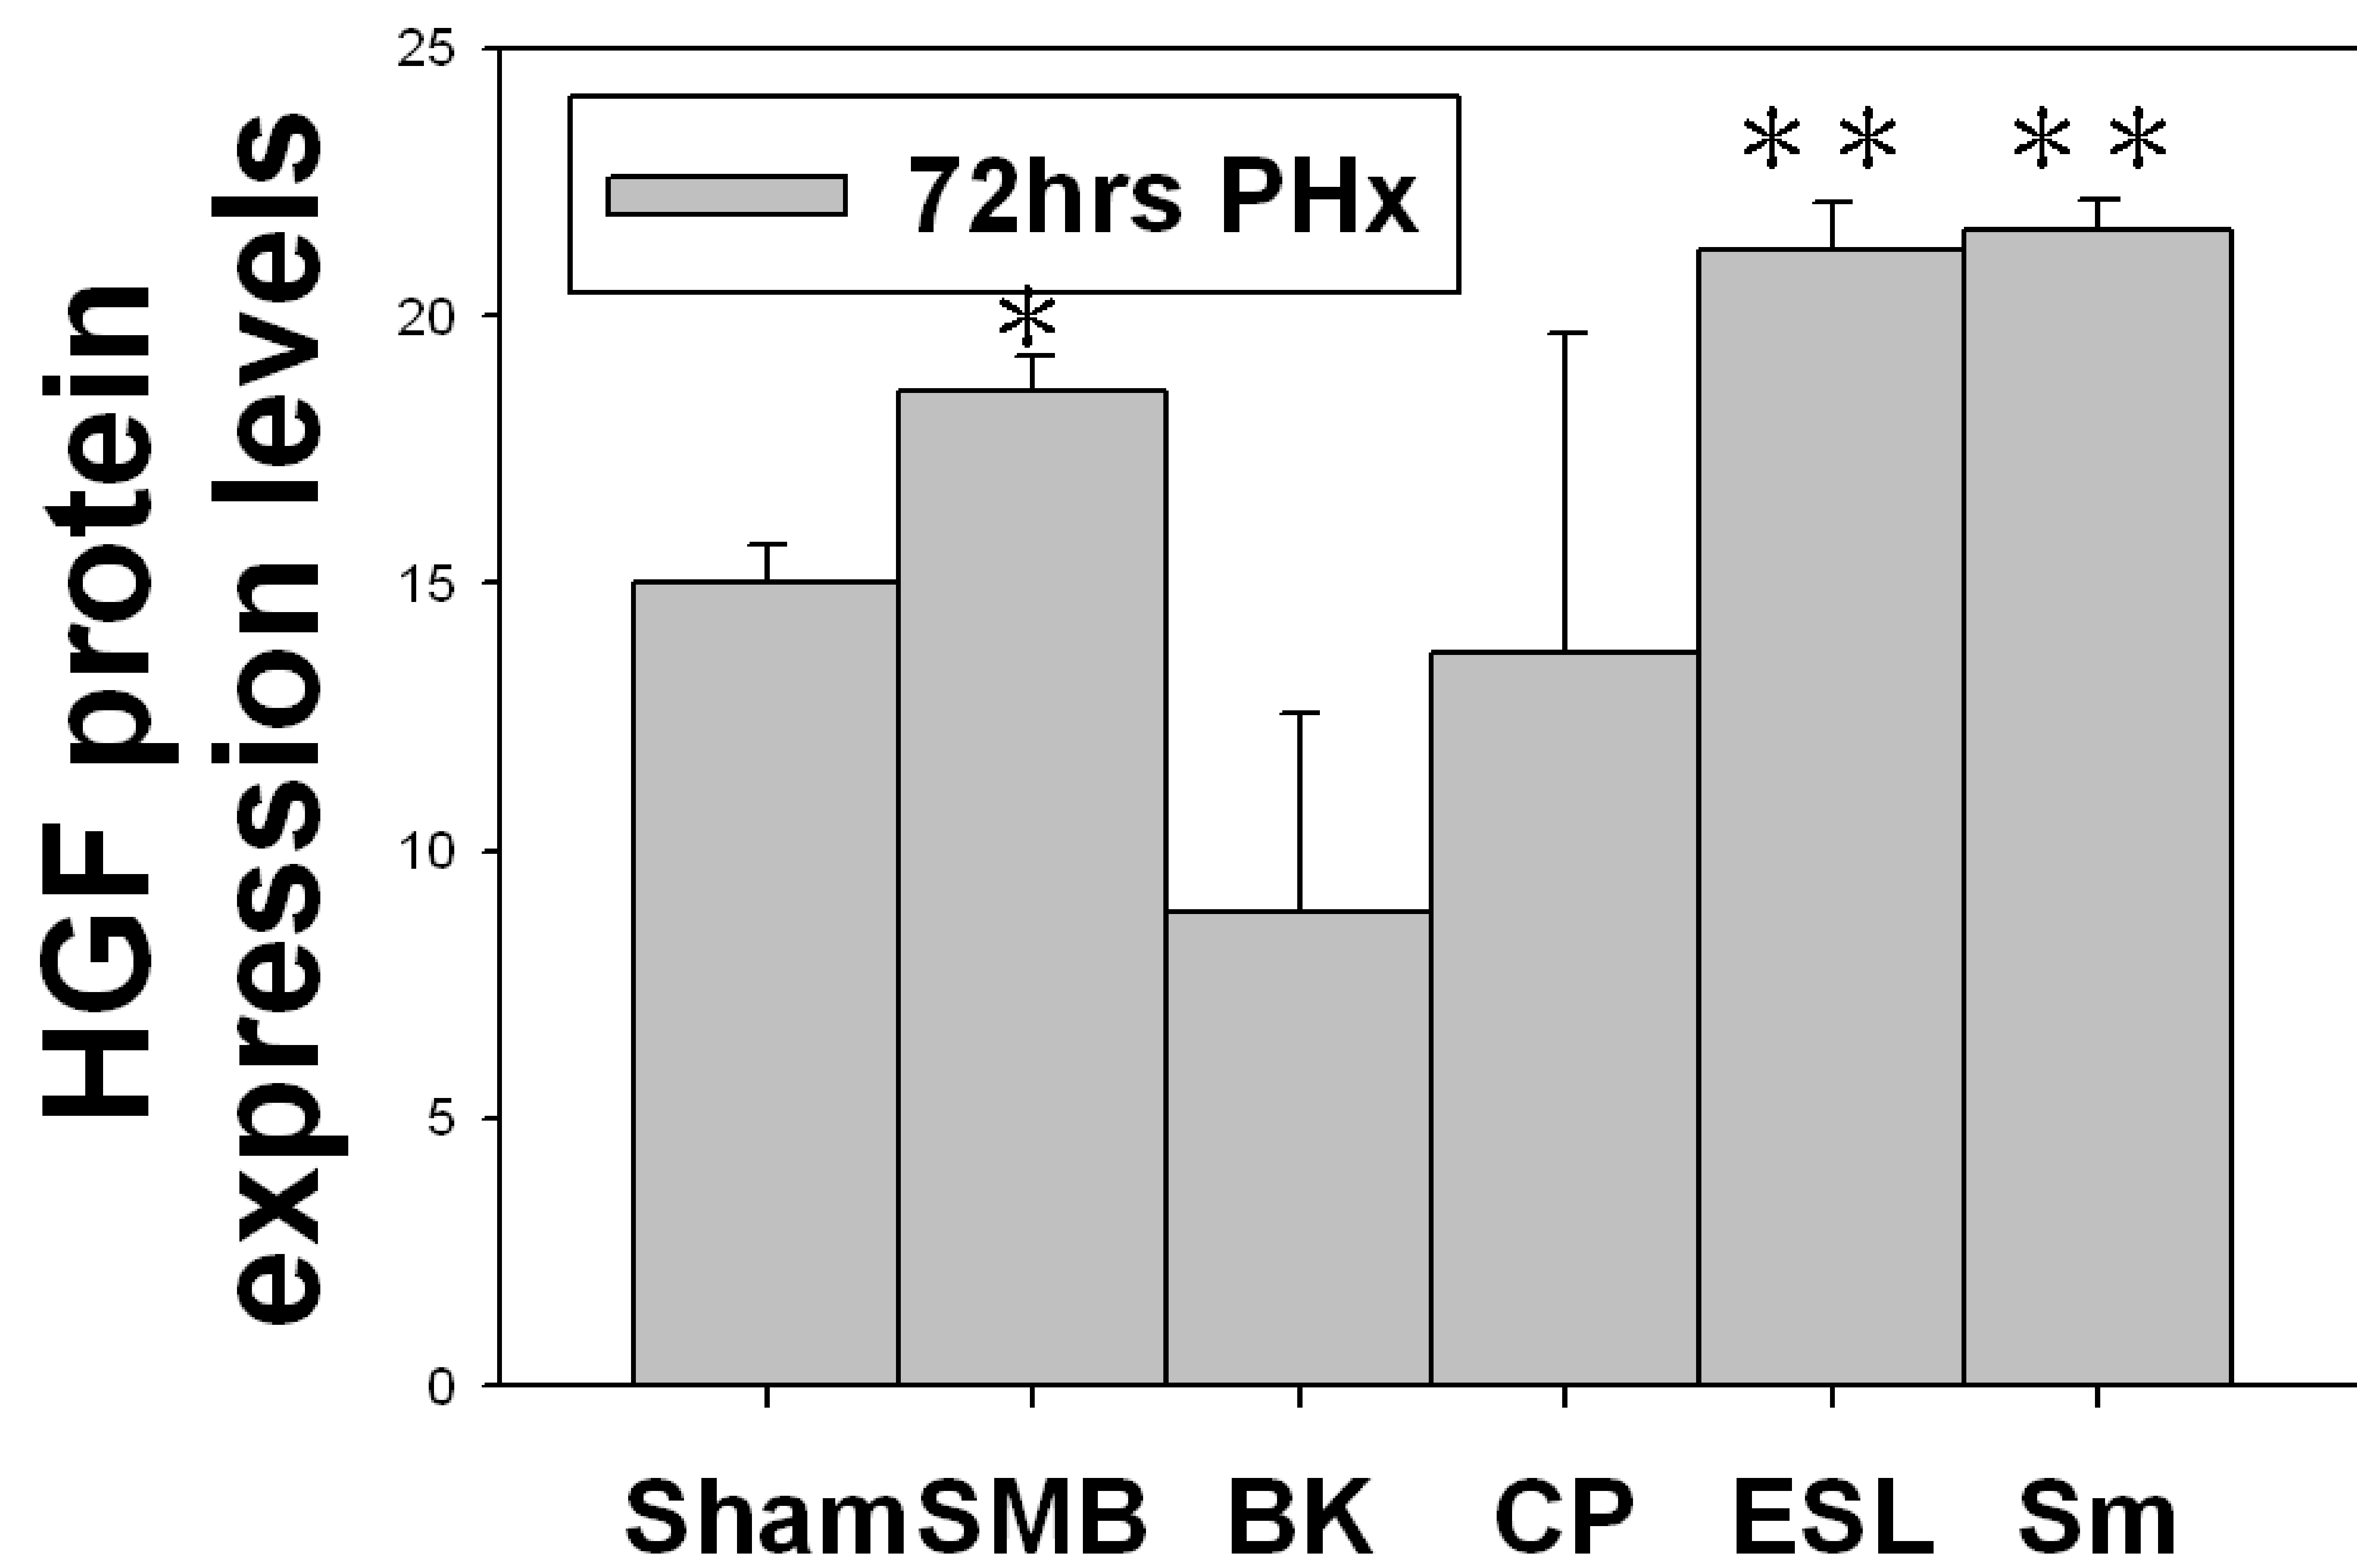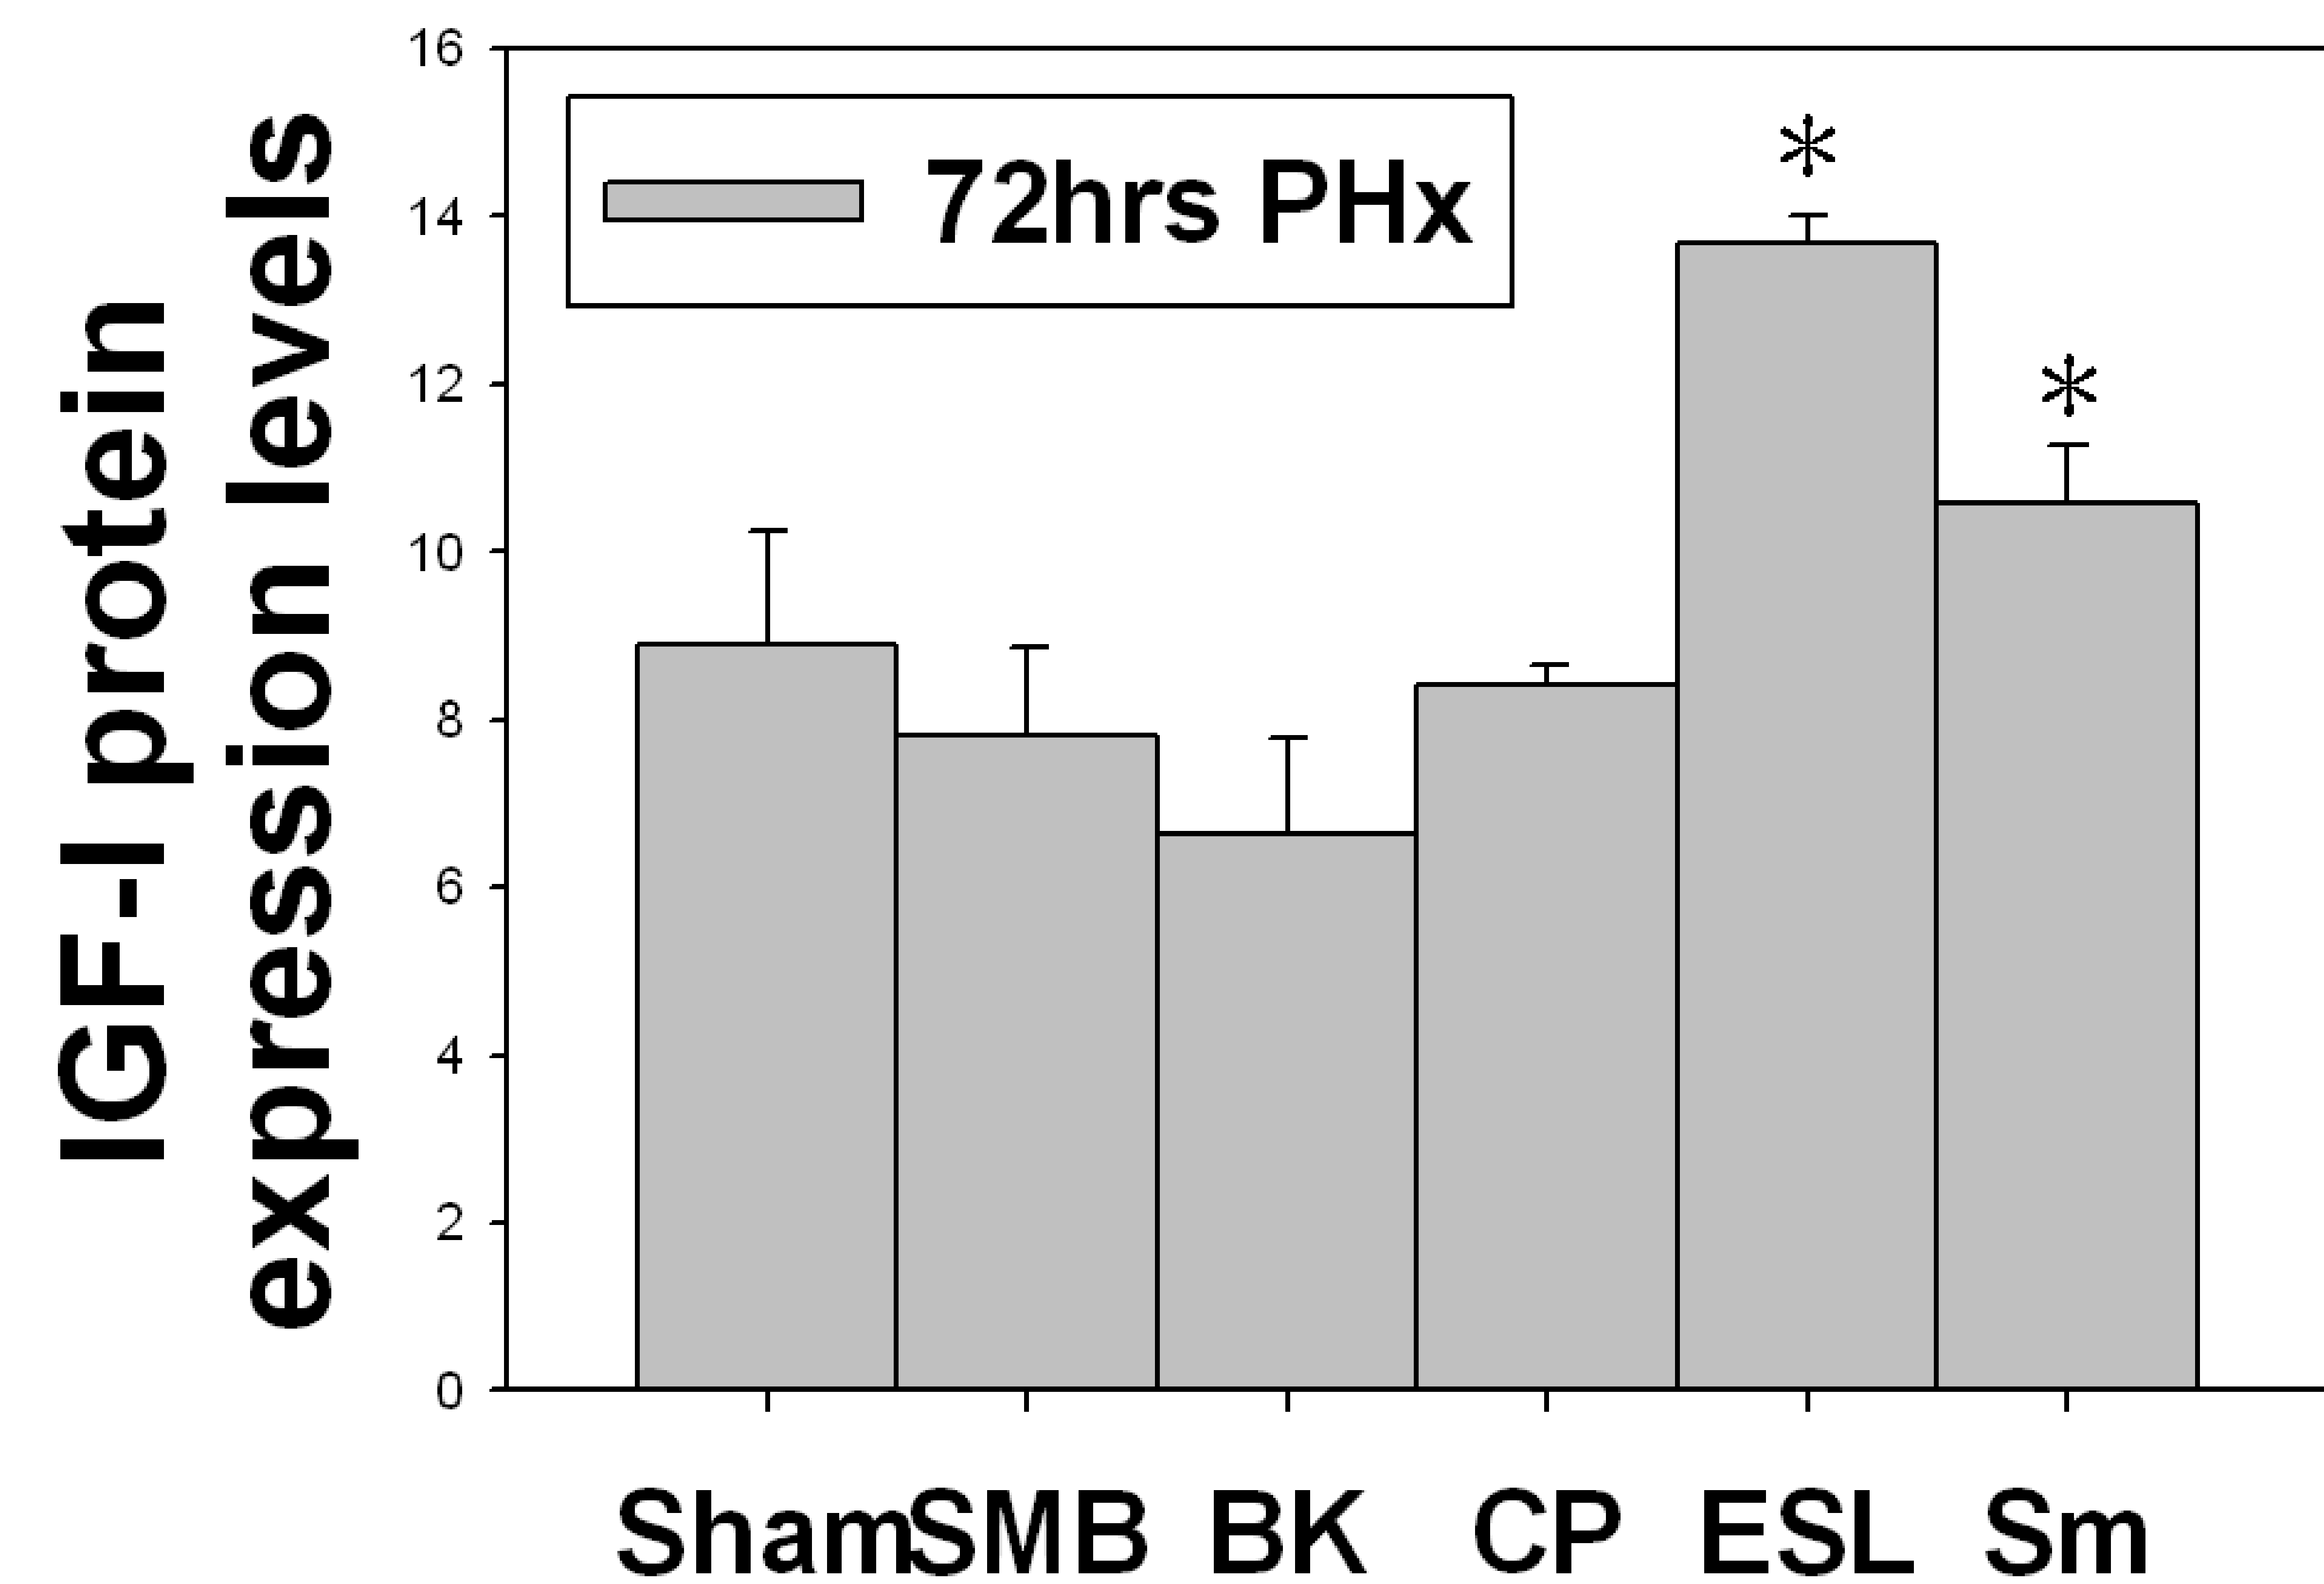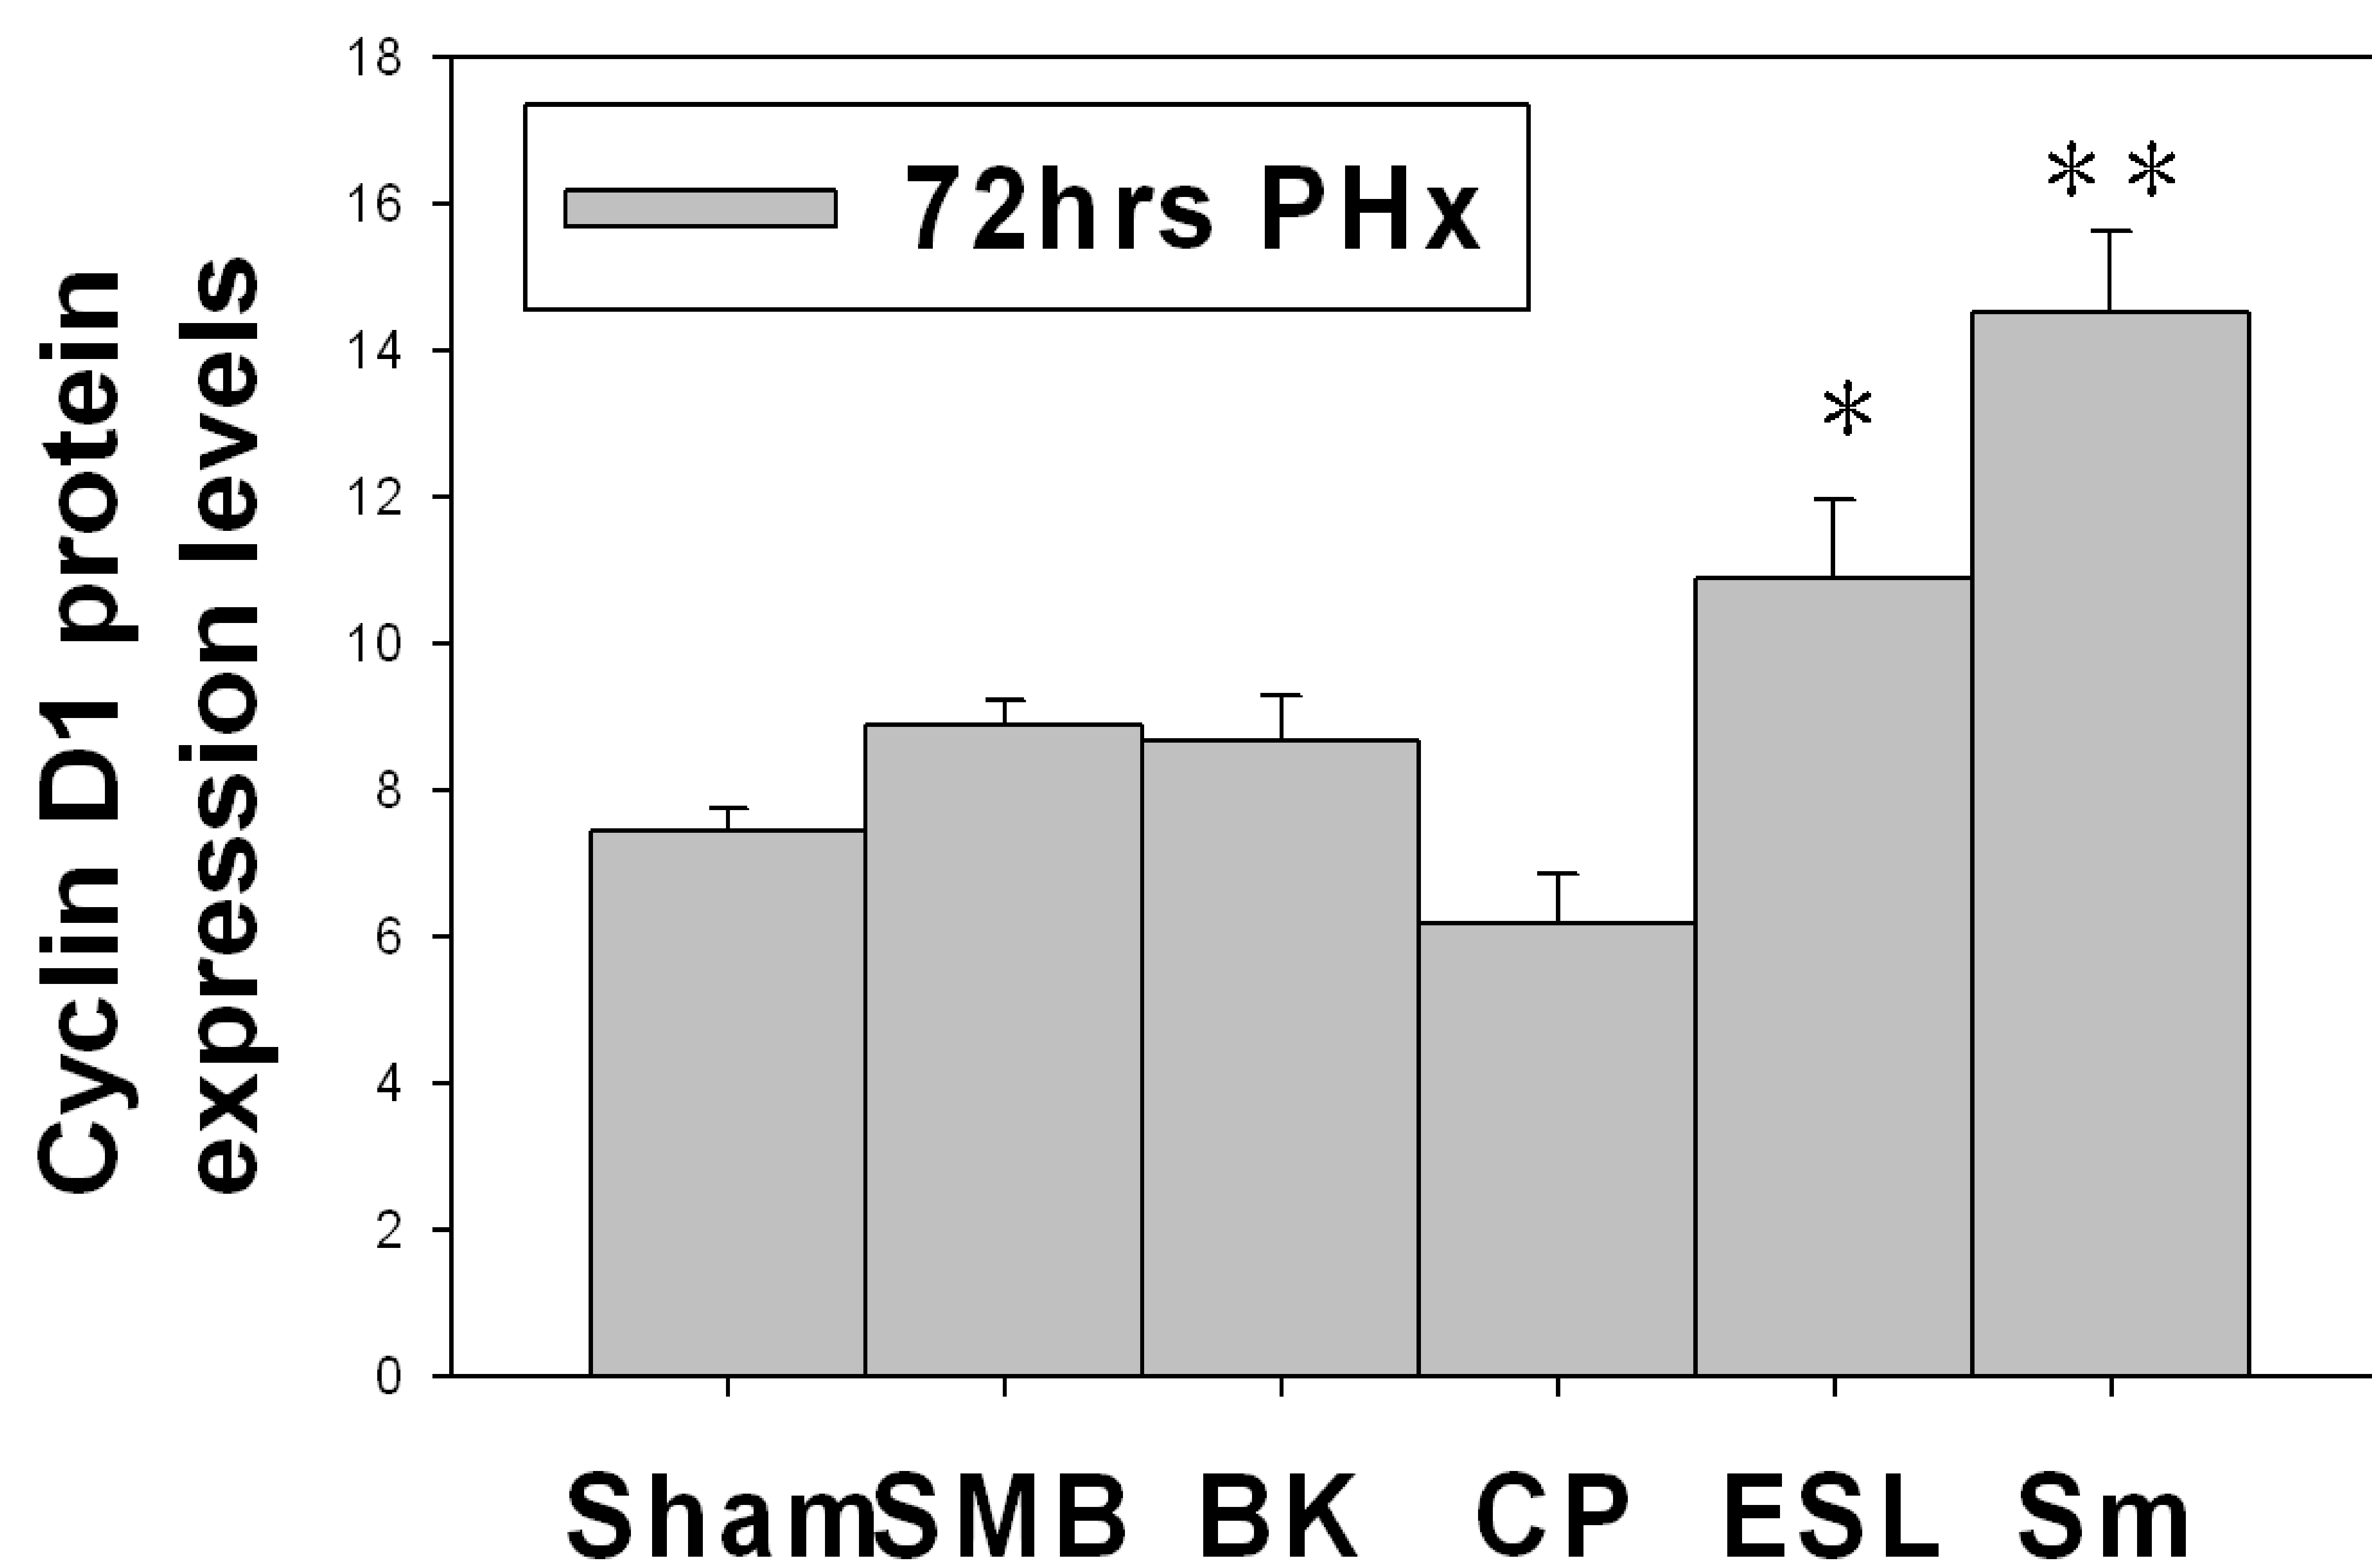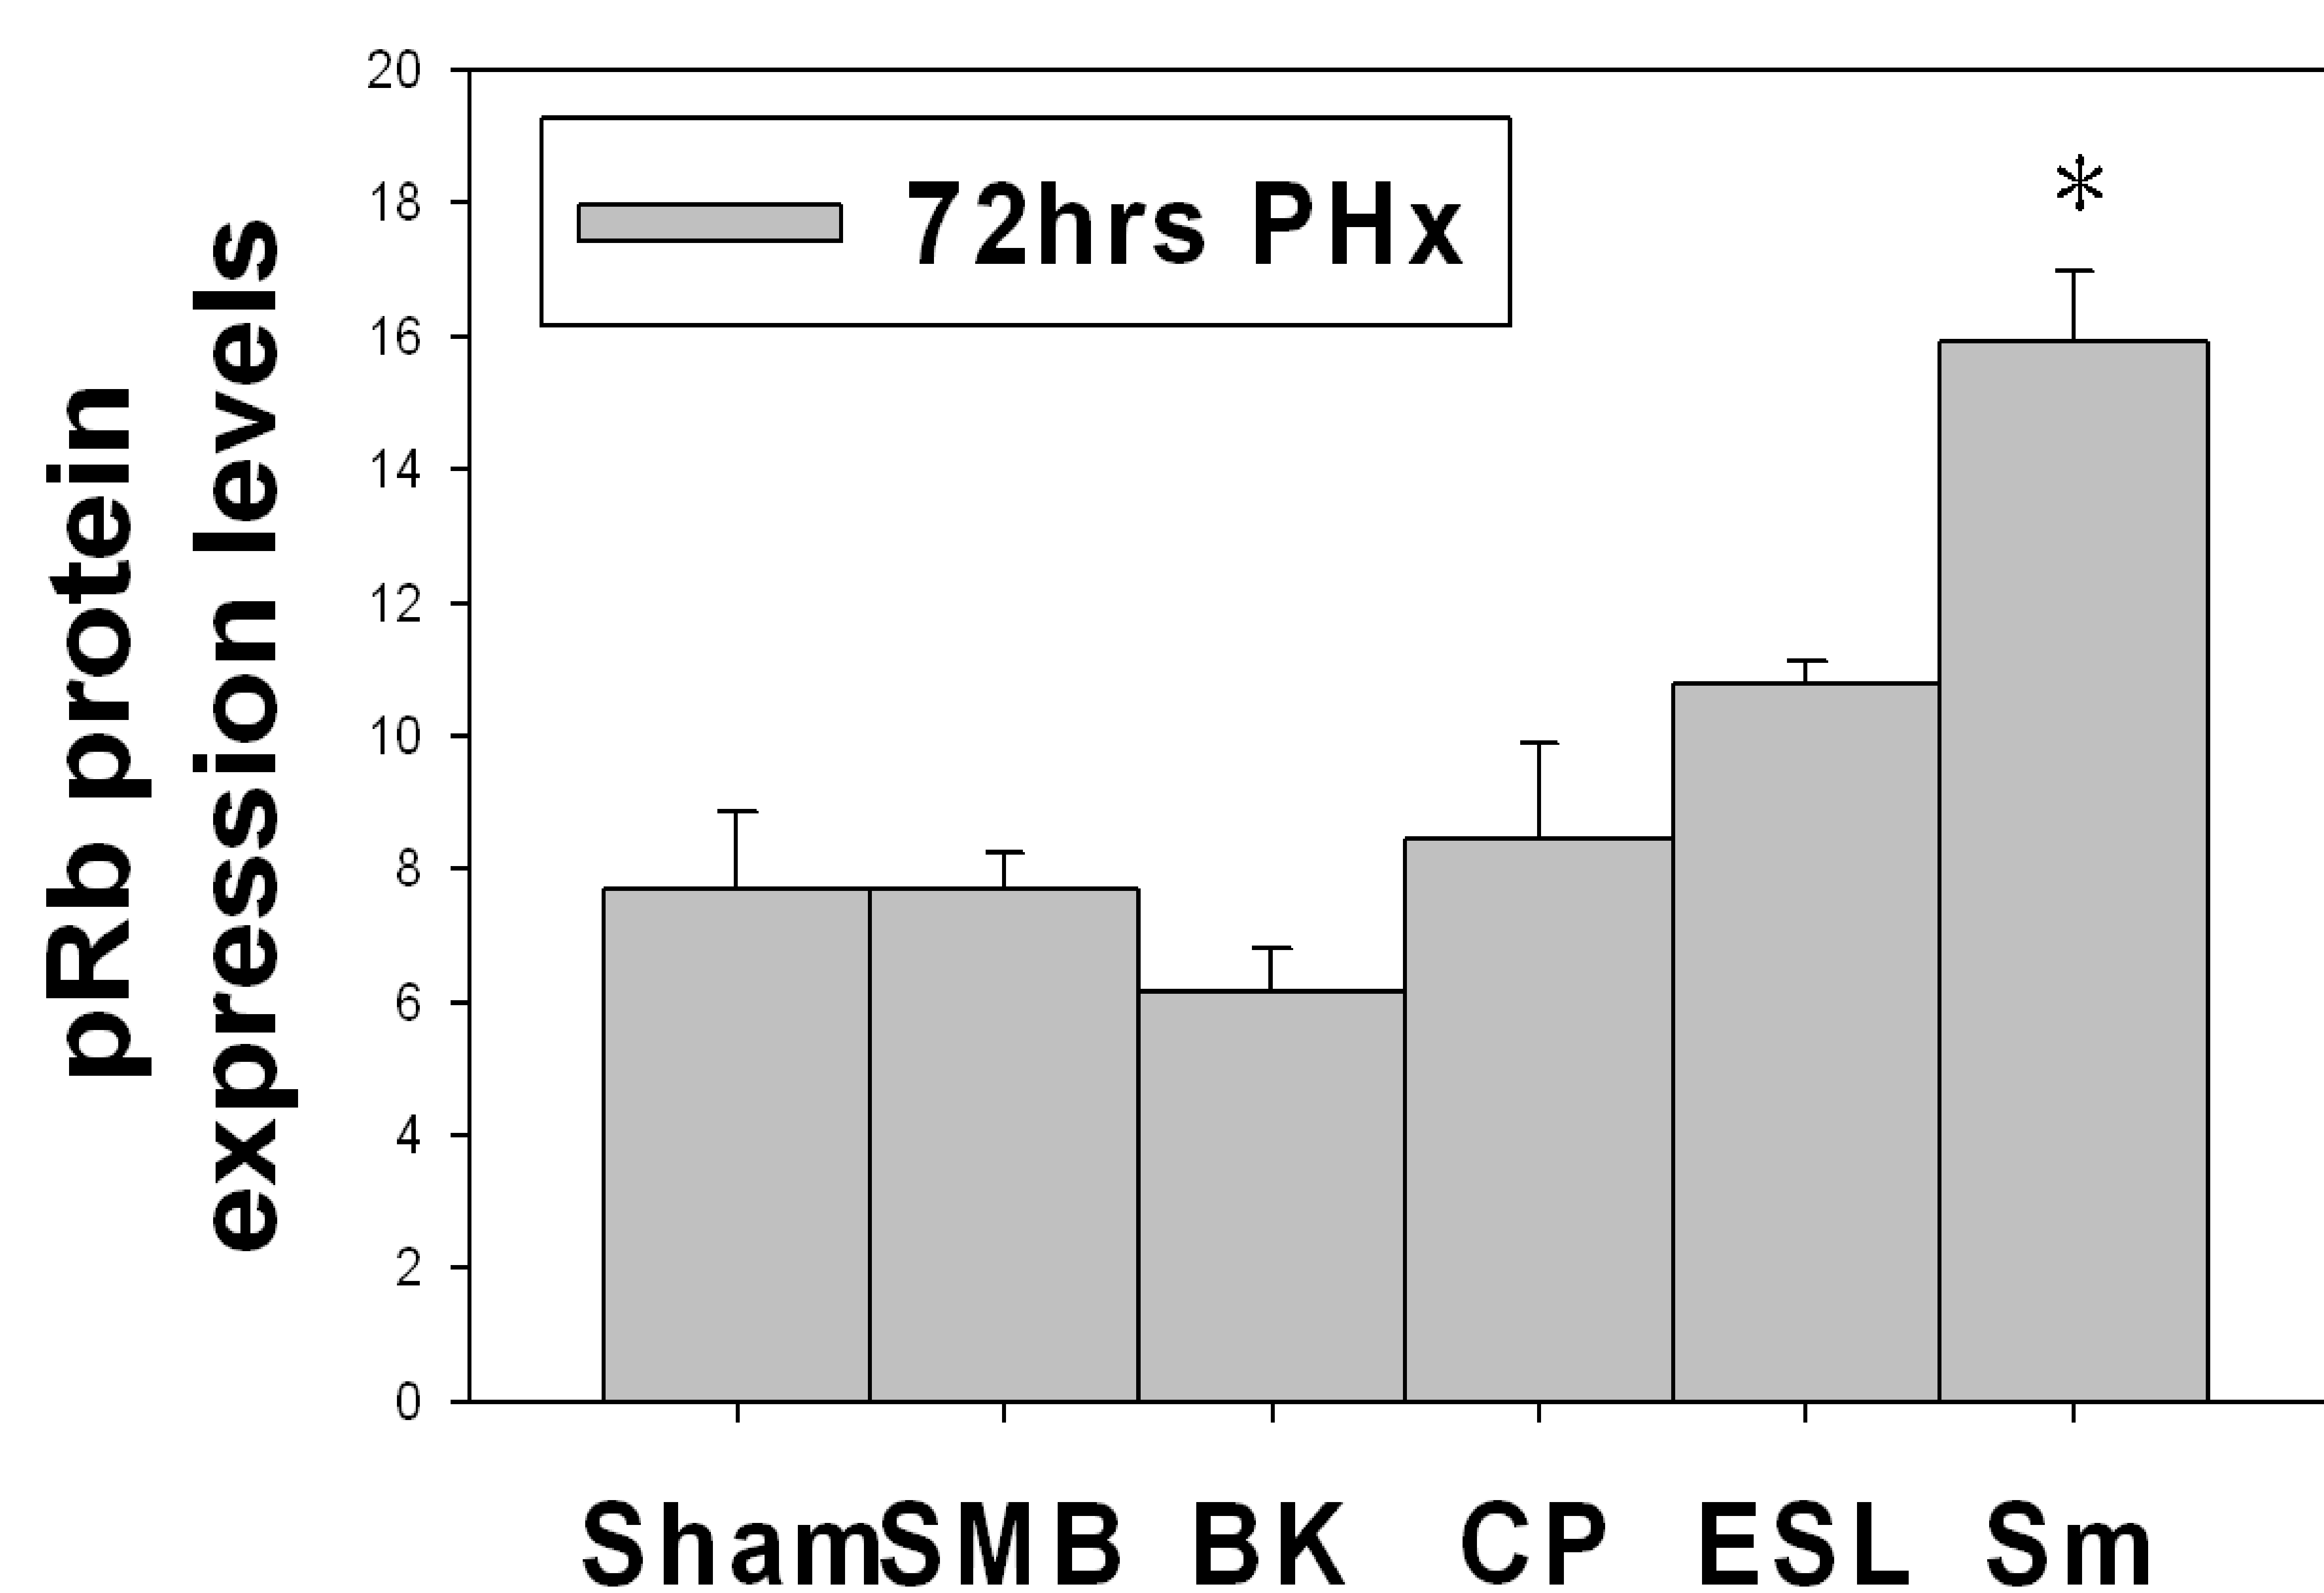

(d)



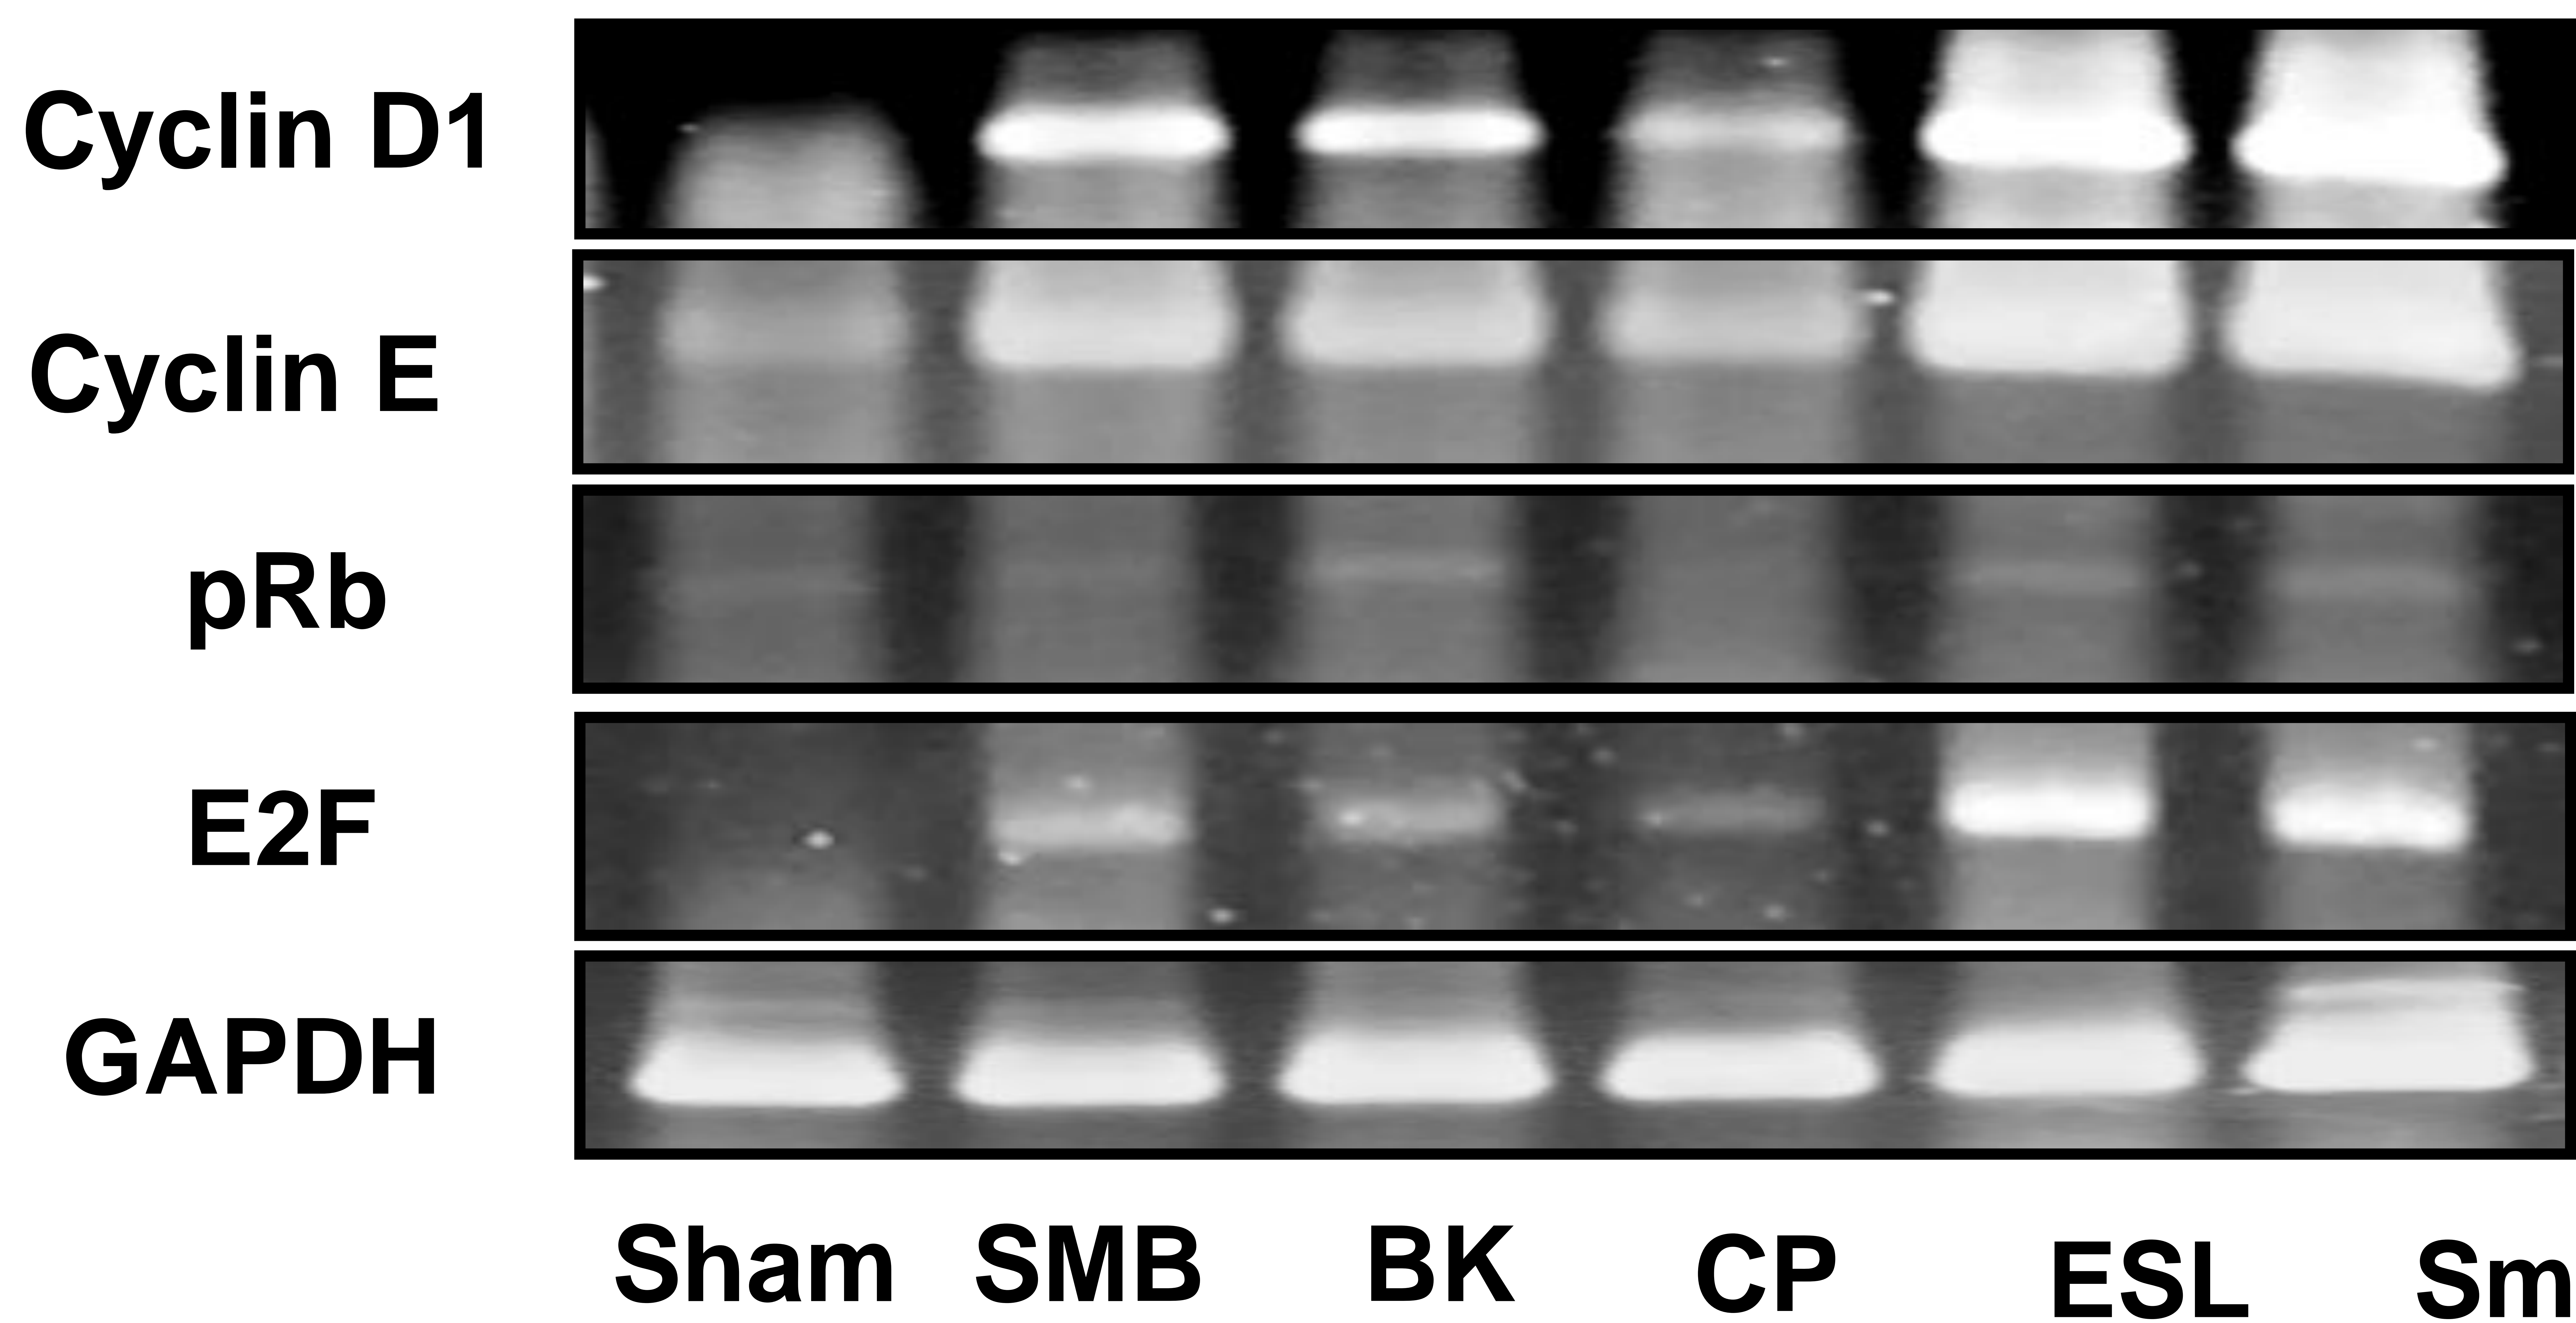

(e)

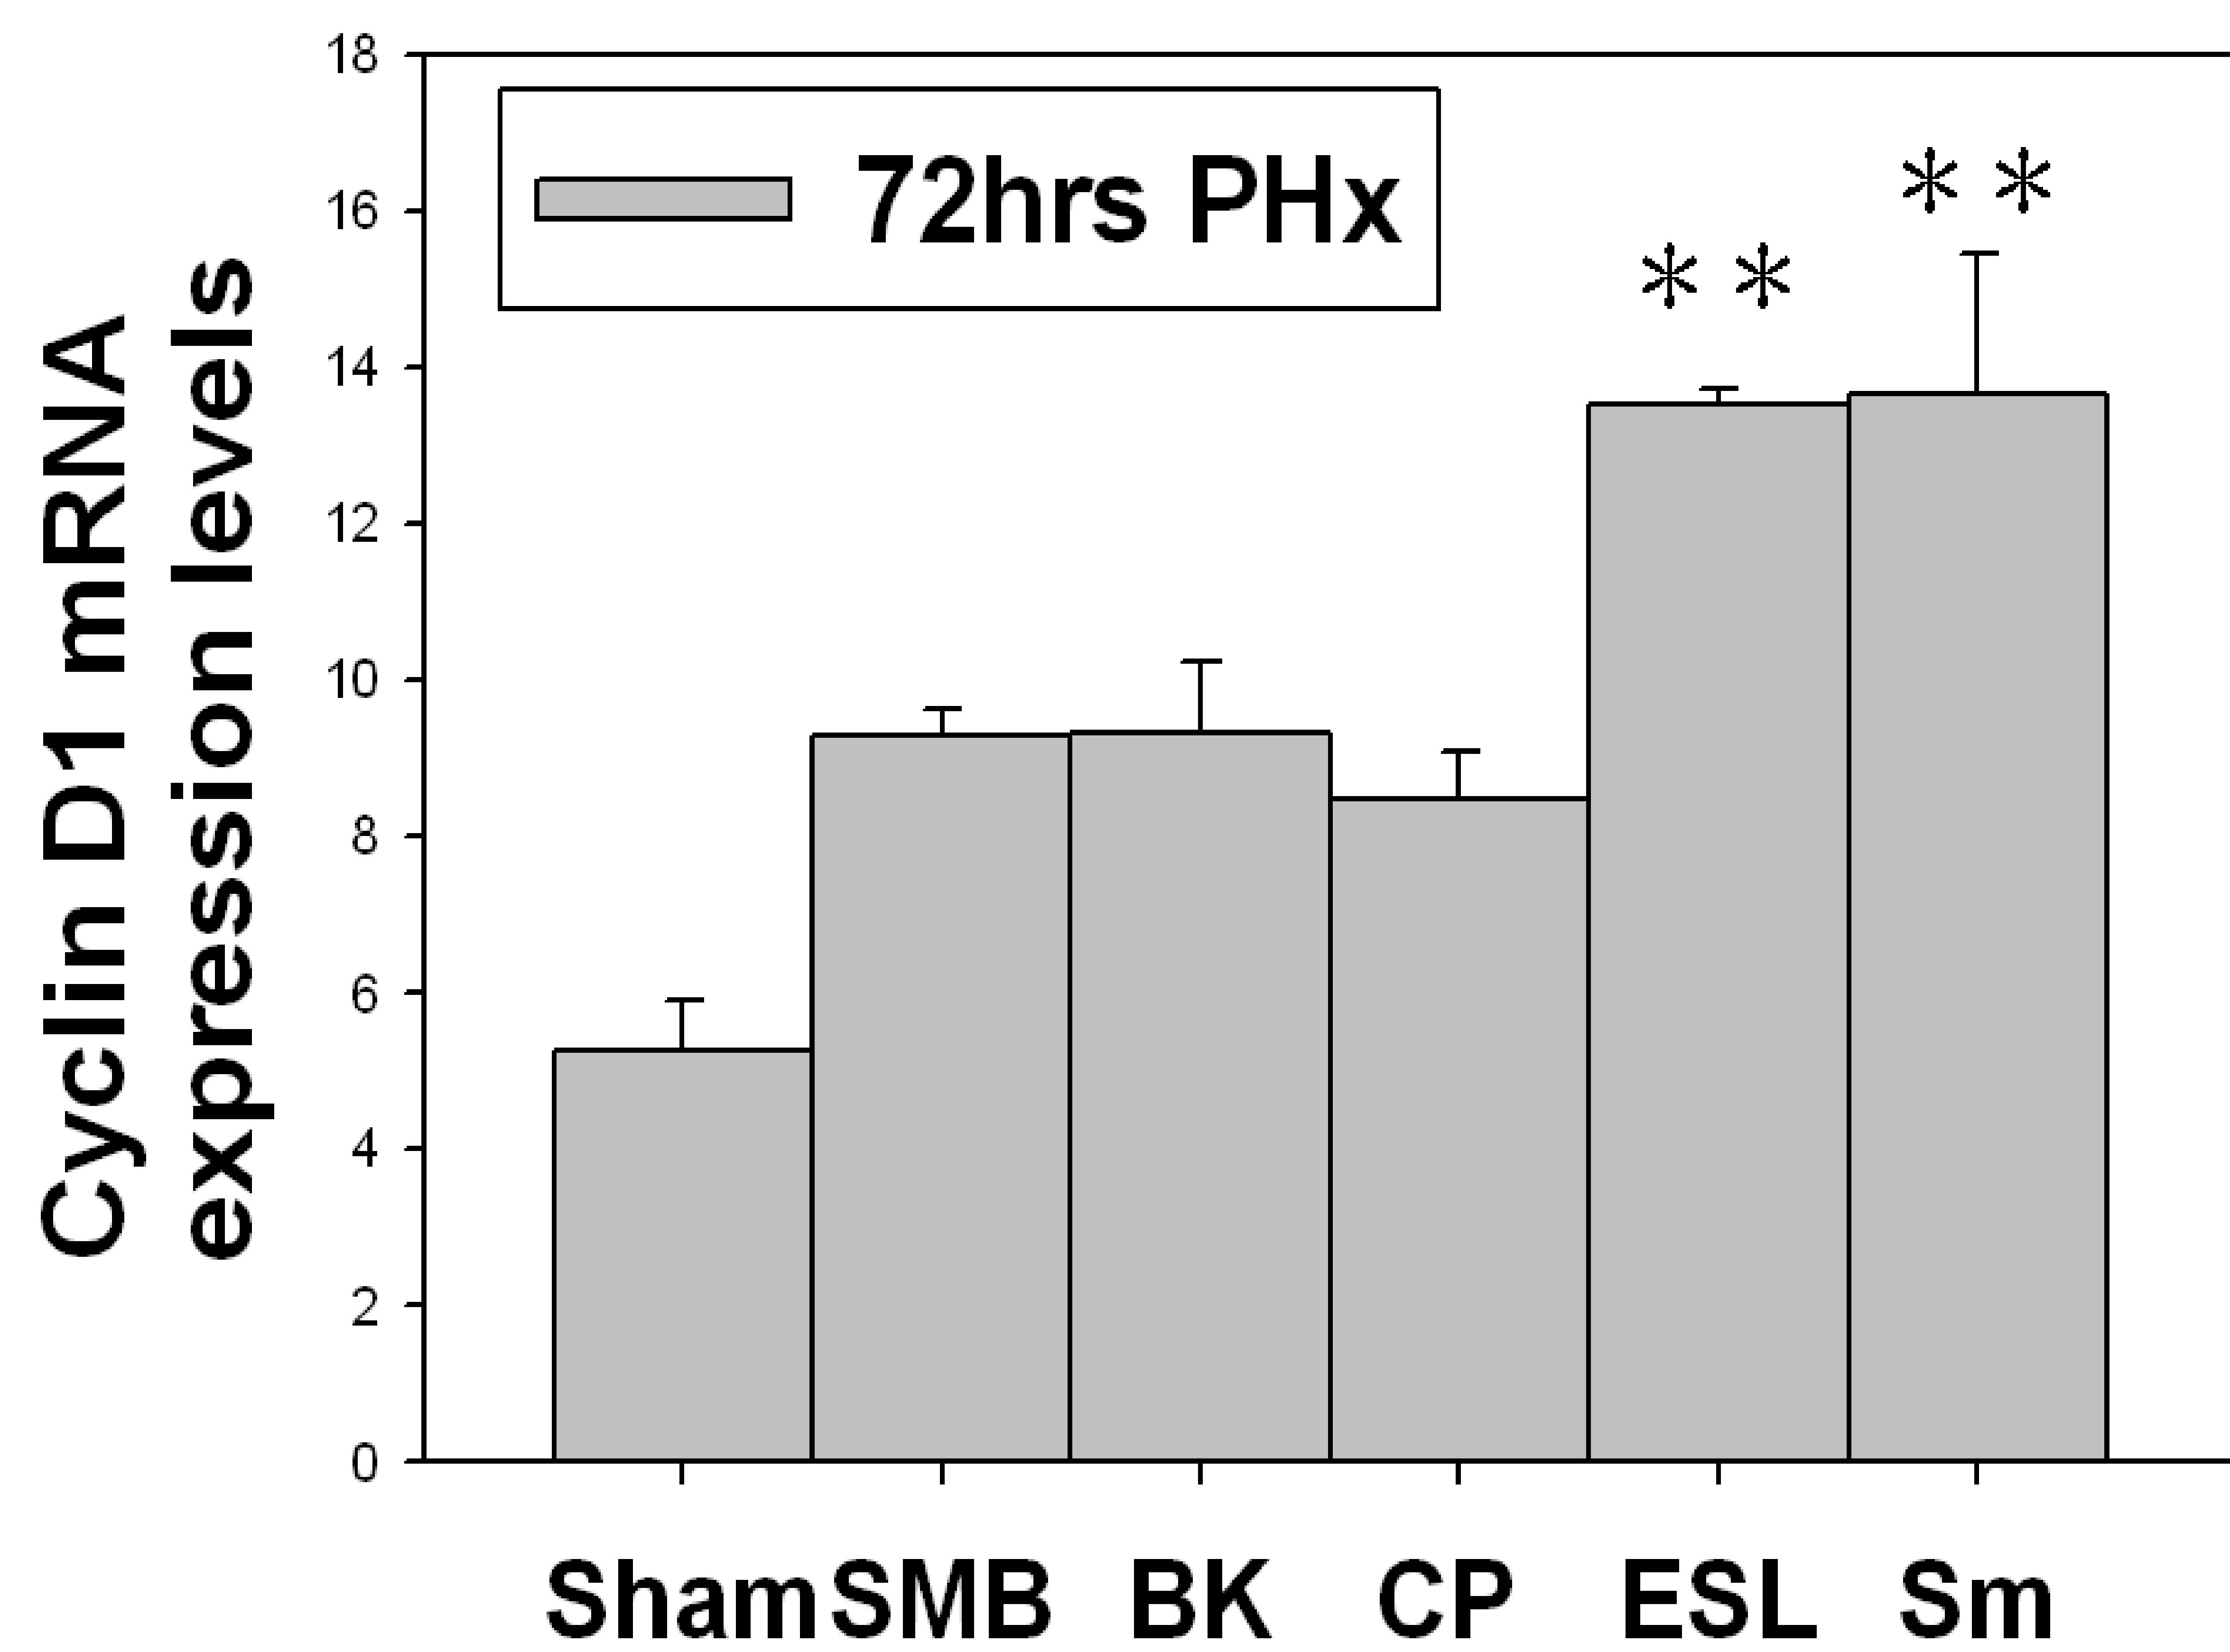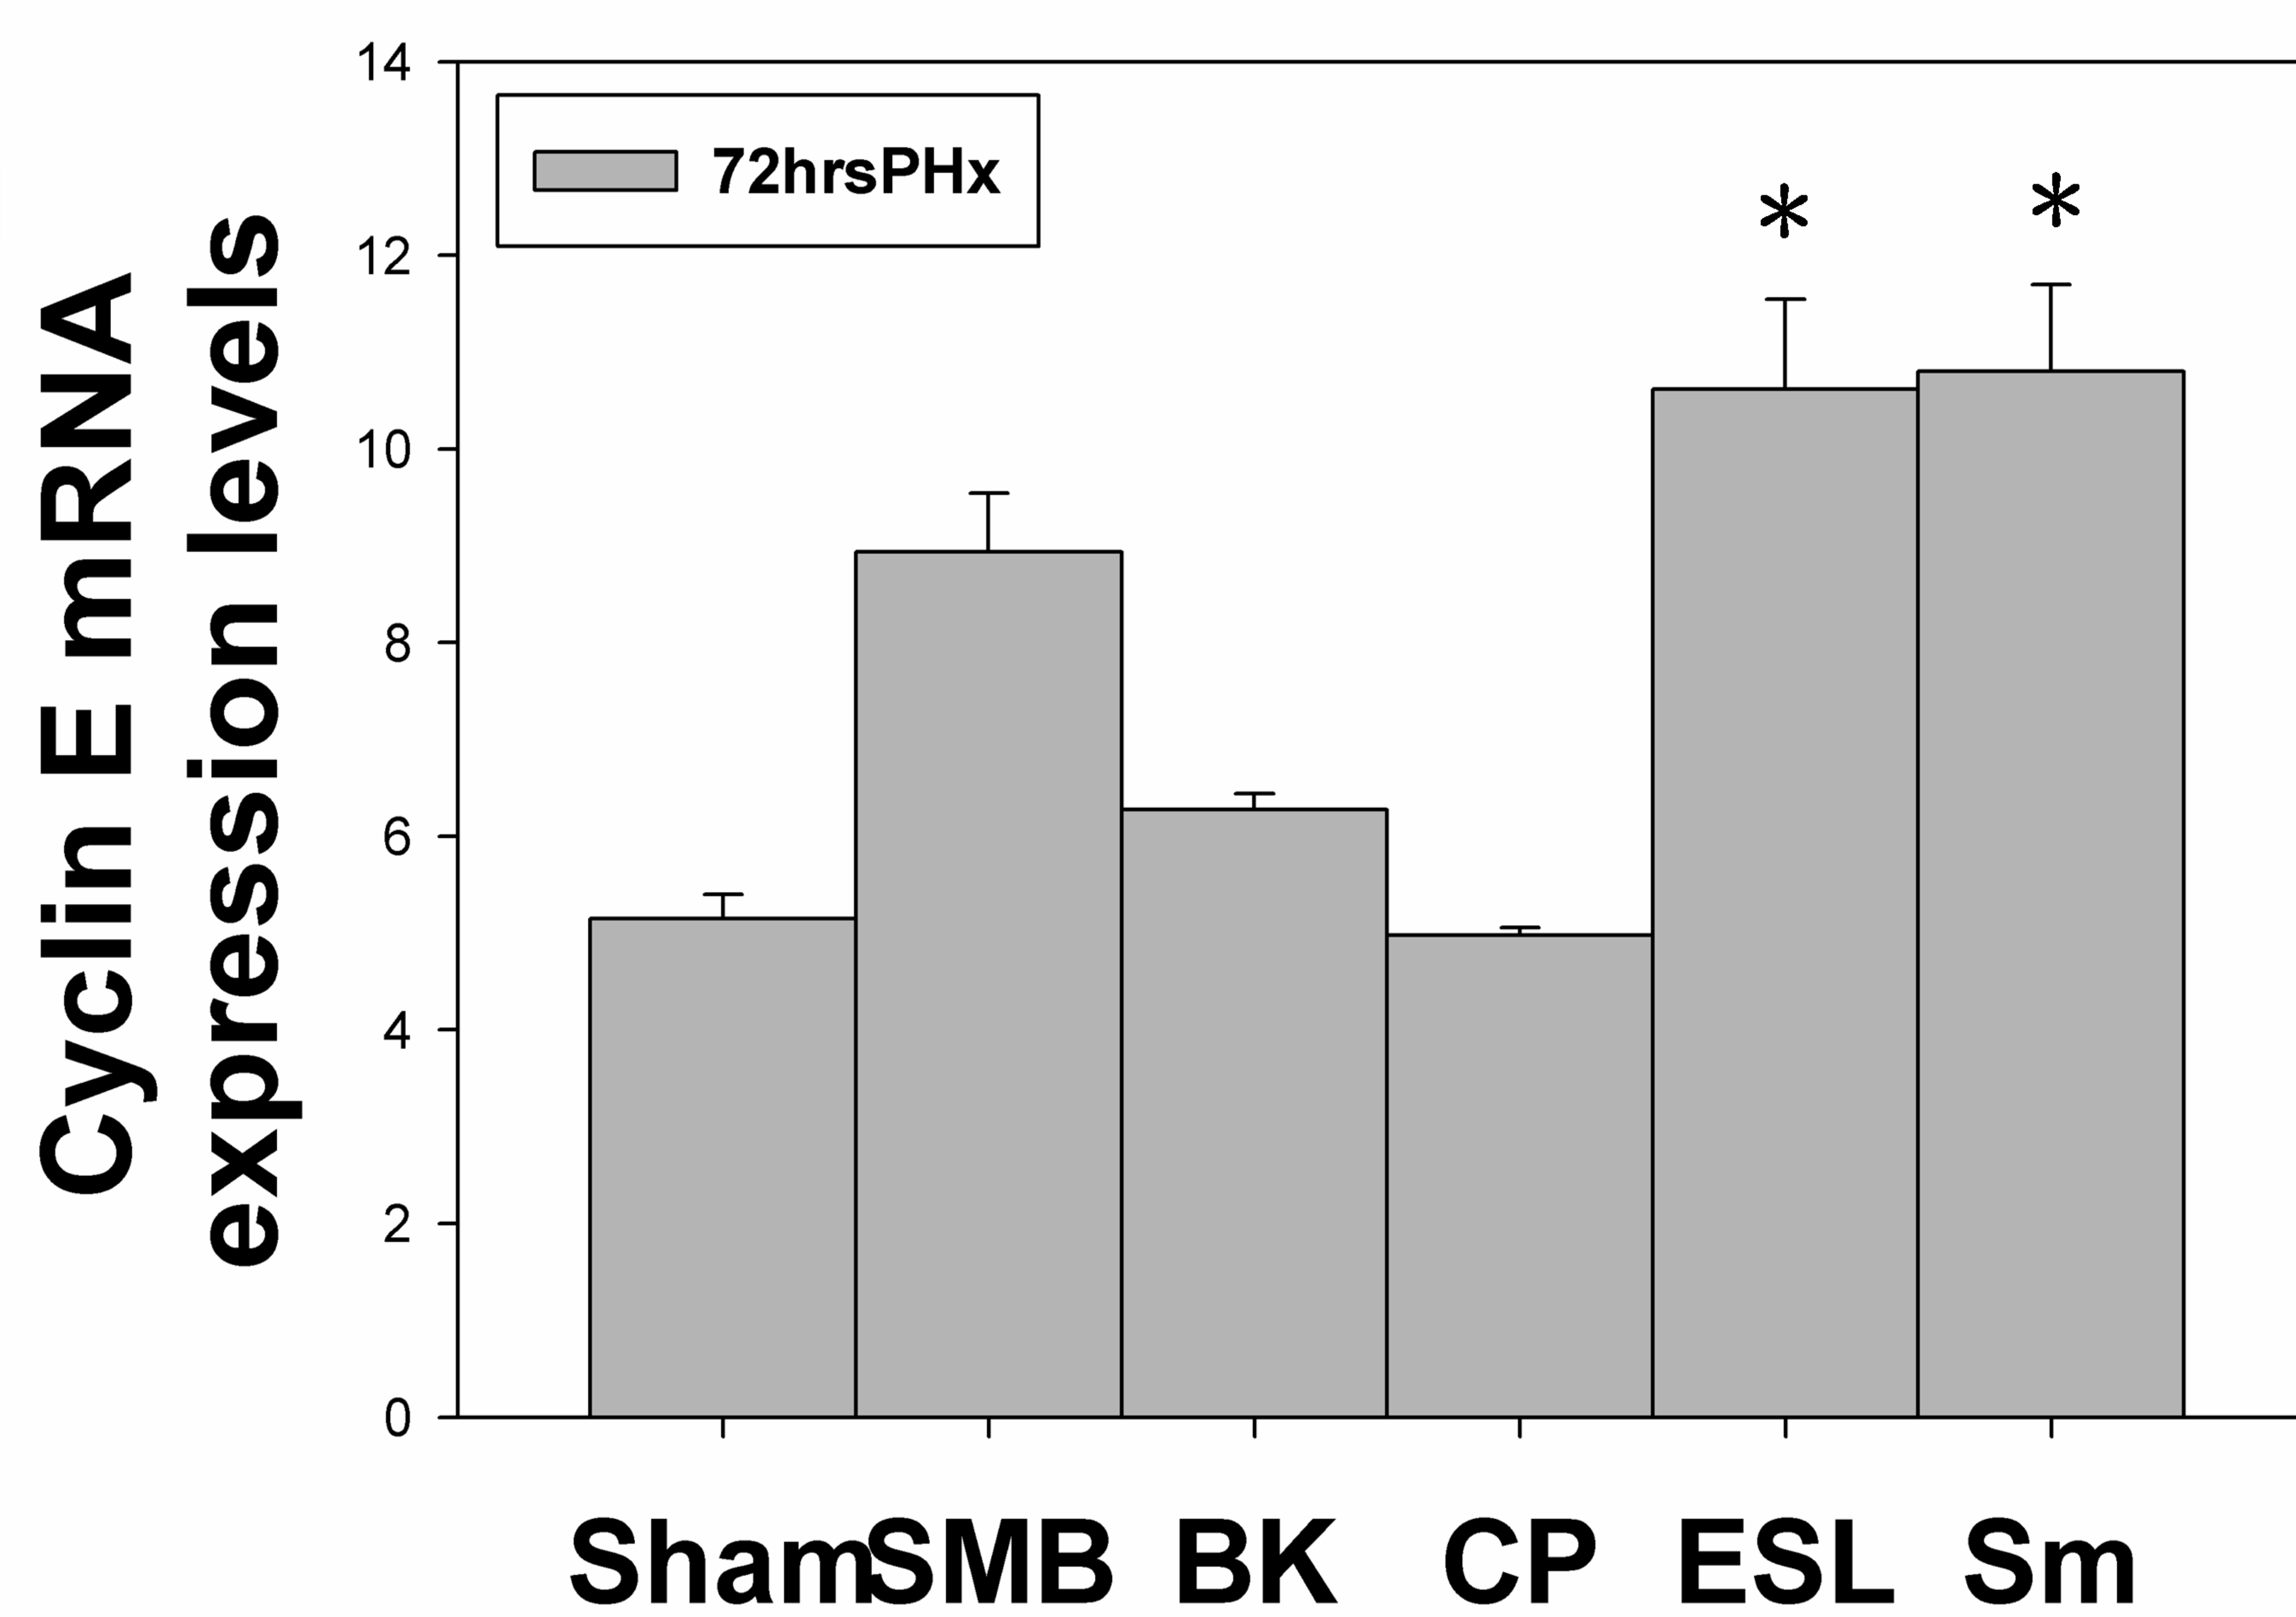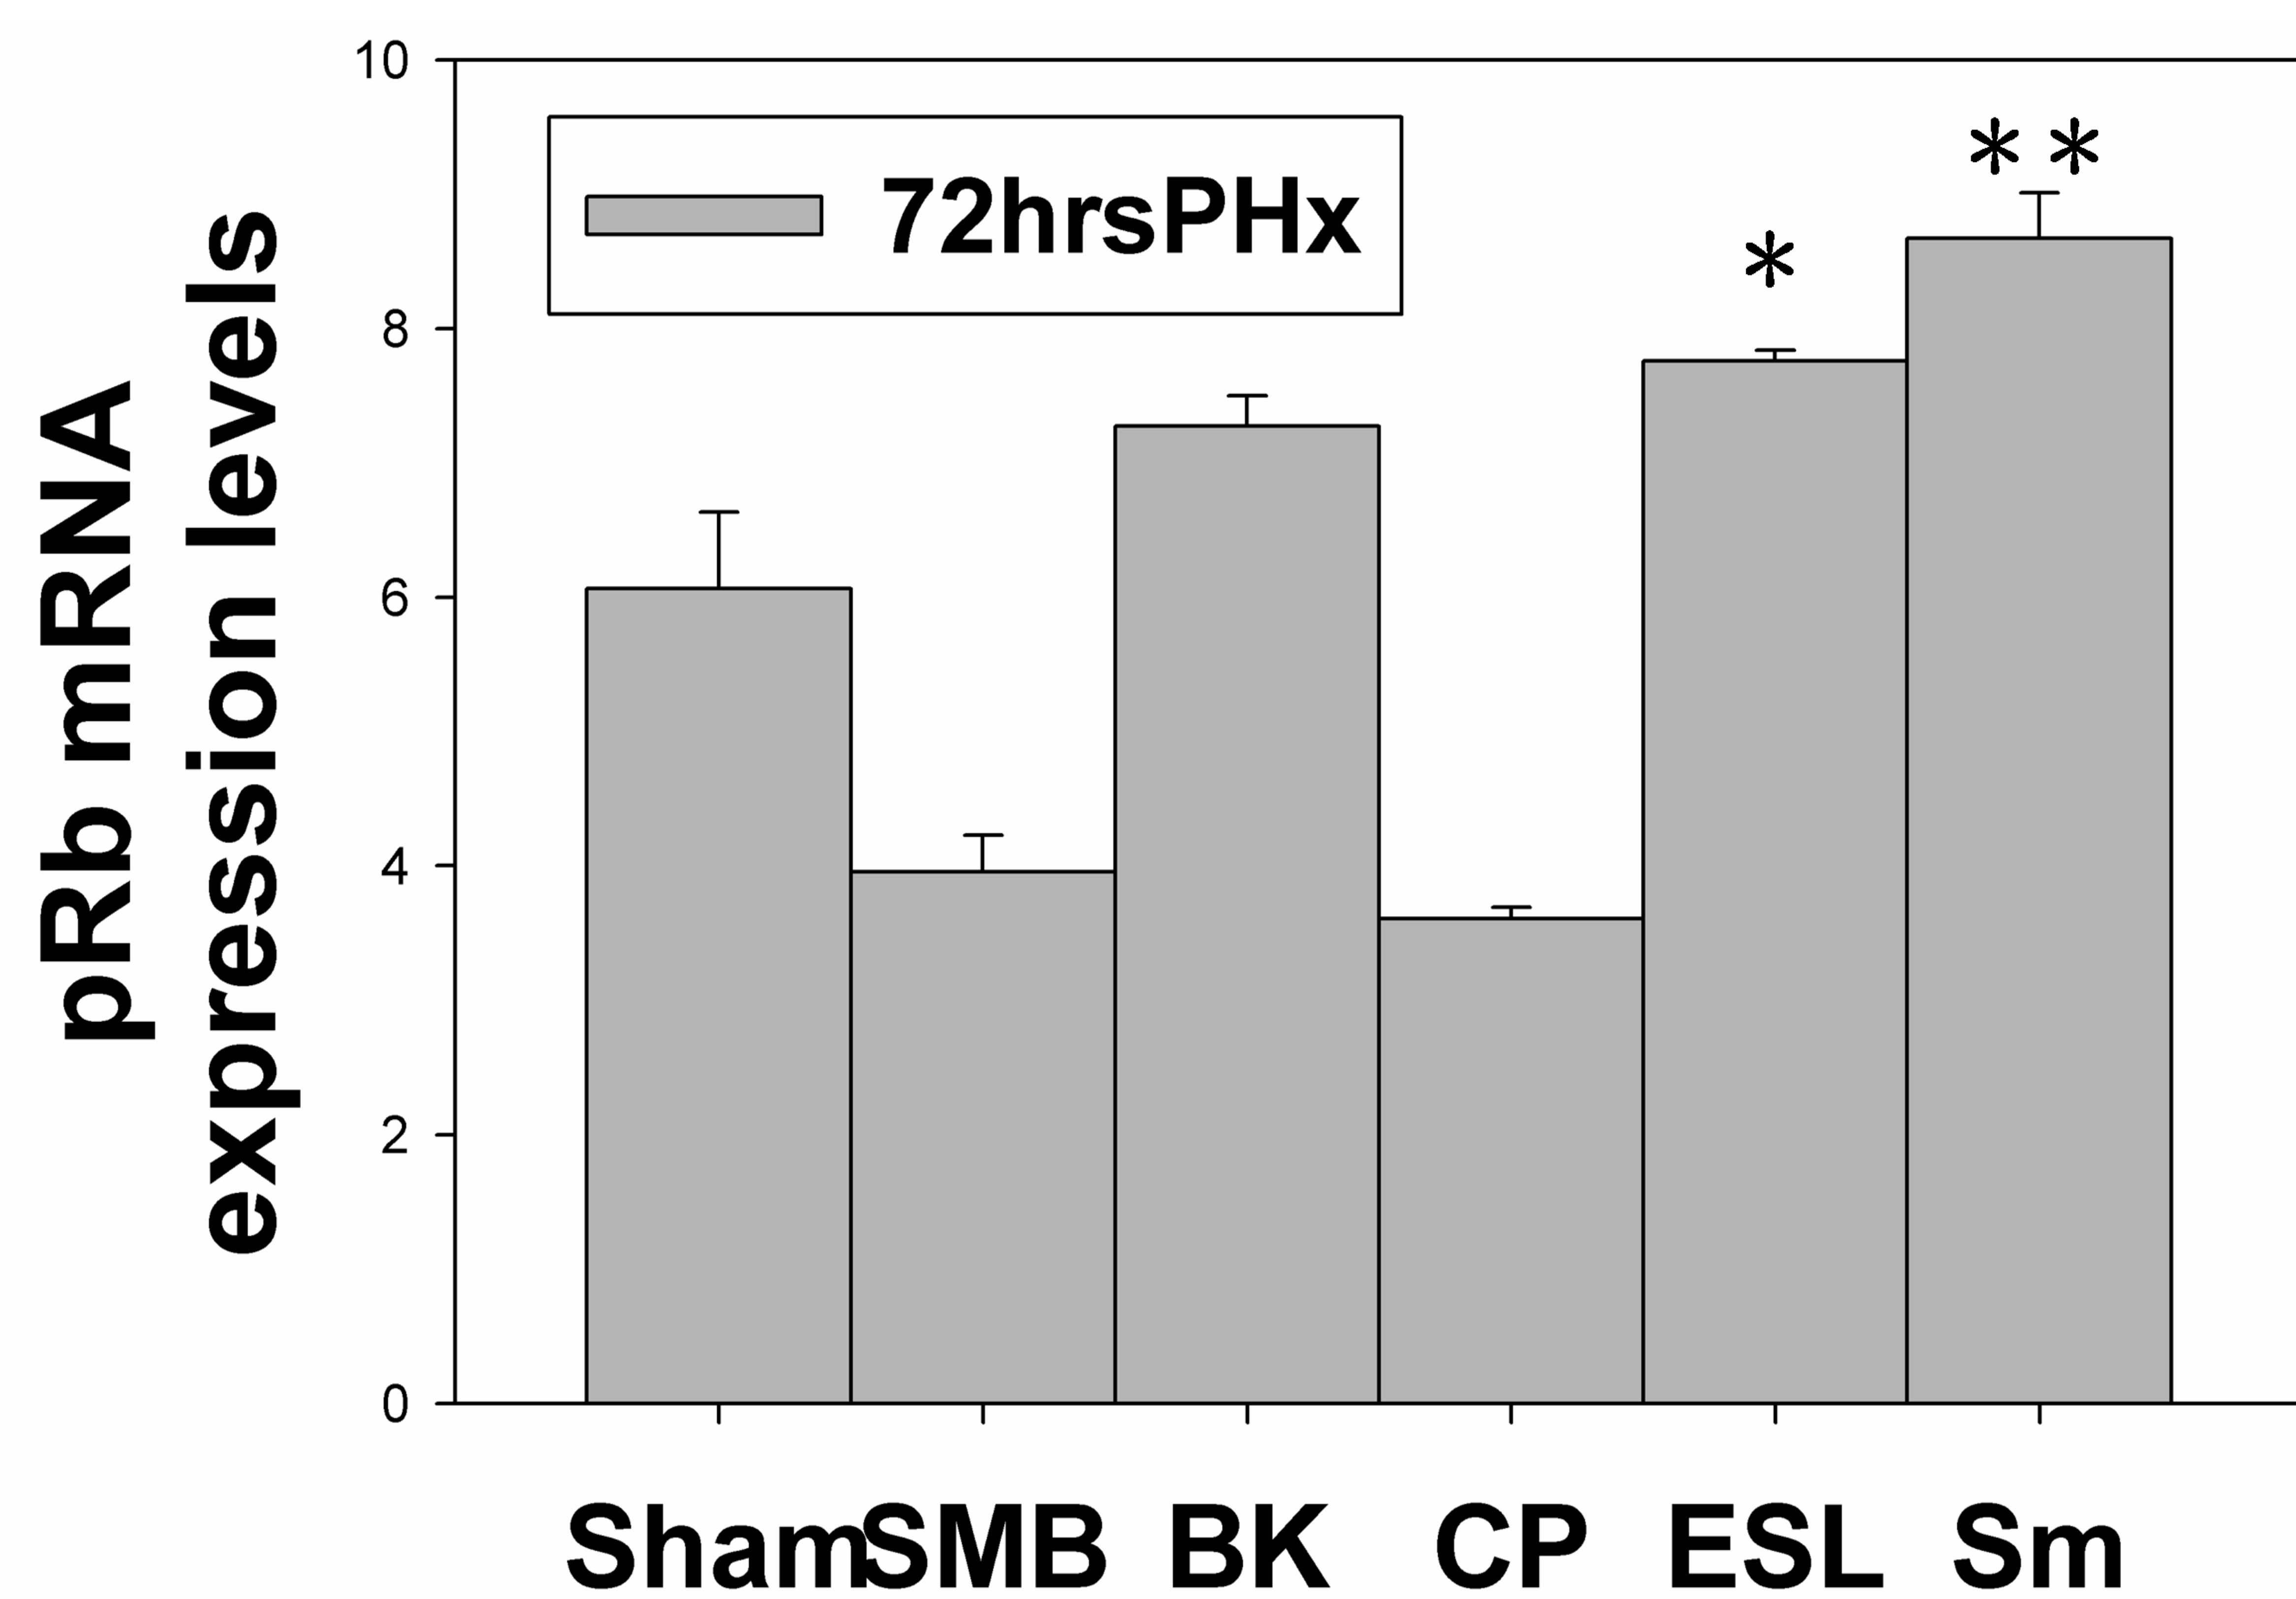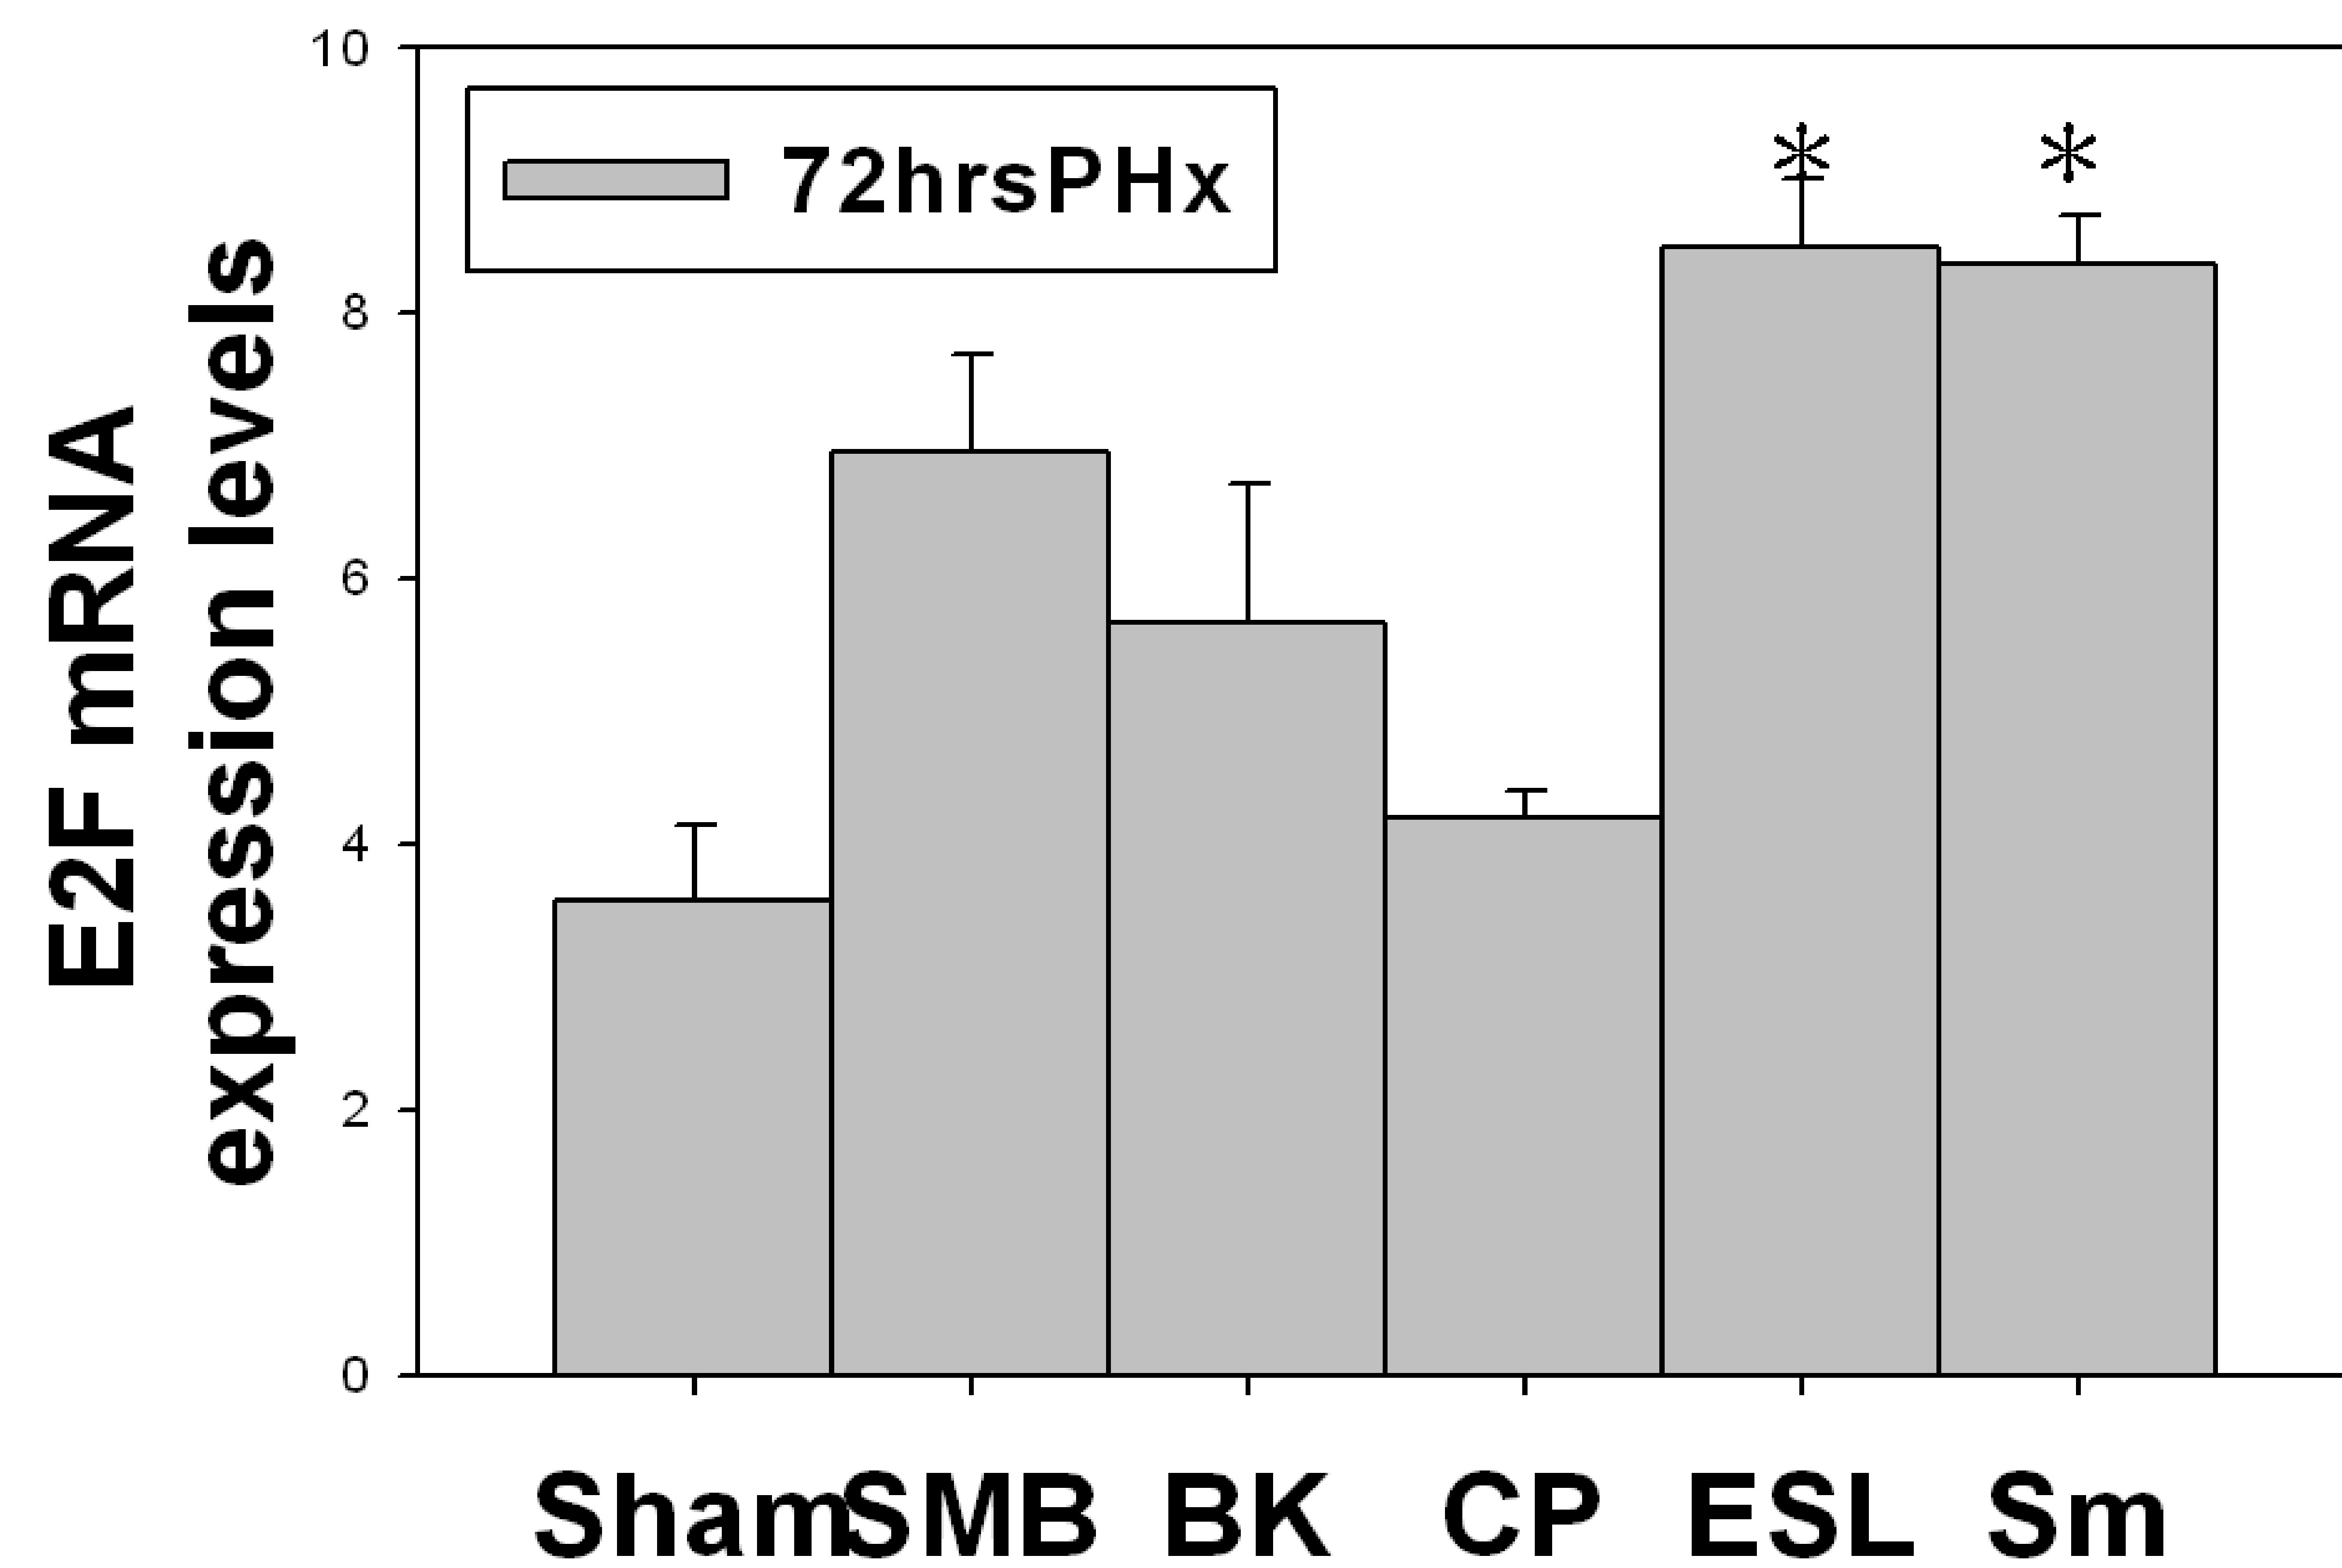

(f)

Supplement: f1 [file 4561243.f1.zip]
